# Supplementary material for: A biomimetic magnetically recoverable palladium nanocatalyst for the Suzuki cross-coupling reaction
Source: Royal Society of Chemistry journal article supplement (doi:10.1039/c6ra03395d), 2016-01-01
Supplement: c6ra03395d1.pdf [file c6ra03395d1.pdf]

## **A biomimetic magnetically recoverable Palladium nanocatalyst for Suzuki cross-coupling reaction**

Abhishek V. Dubey and A. Vijay Kumar\*

Department of Chemistry, Institute of Chemical Technology, Matunga, Mumbai,  
Maharashtra, India - 400019, vijayakki@gmail.com

### **Materials and Methods:**

All reagents and starting materials were obtained commercially sources and were used without additional purification. Thin Layer Chromatography (TLC) was performed on silica (Silica Gel 60 F254) pre-coated aluminium plates and the products were visualized by UV lamp (PHILIPS TUV 8W lamp) and I<sub>2</sub> stain. X-ray powder diffraction (XRD) patterns were recorded on a (Shimadzu XRD-6100 using CuK radiations = 1.5405 Å) powder diffractometer instrument. Transmission Electron Microscopy studies were performed using a PHILIPS CM200 Transmission Electron Microscope (TEM) at 100 kV. ICP-AES (Inductively Coupled Plasma-Atomic Emission Spectrometer) were performed using ARCOS model instrument from M/s Spectro, Germany. The <sup>1</sup>H and <sup>13</sup>C NMR was recorded in CDCl<sub>3</sub> using residual solvent peak as a reference on an Avance III and Bruker NMR spectrophotometer at 400 MHz and 100 MHz respectively.

### **Preparation of Fe<sub>3</sub>O<sub>4</sub>@Polydopamine (PDA) Core-Shell:**

Fe<sub>3</sub>O<sub>4</sub> nanoparticles (1 gram) were dispersed (pre-sonicated for 30 minutes) in 300 ml of de-ionized water and the pH was maintained at 8.5 by adding 10 mM Tris-HCl buffer. To this dopamine (1 gram) pre-dissolved in 200 mL of deionized water was added all at once. The solution is stirred by using a mechanical overhead stirrer fitted with a rod at room temperature for 24 hr. The polydopamine capped Fe<sub>3</sub>O<sub>4</sub> nanoparticles were collected by using laboratory permanent magnet and washed 3 times with water, ethanol and acetone. The as prepared polydopamine capped Fe<sub>3</sub>O<sub>4</sub> nanoparticles are dried overnight at room temperature in a desiccator.

### **Preparation of Pd/Fe<sub>3</sub>O<sub>4</sub>@PDA:**

1 gram of Polydopamine capped Fe<sub>3</sub>O<sub>4</sub> nanoparticles (Fe<sub>3</sub>O<sub>4</sub>@PDA) which were prepared by the above mentioned procedure was dispersed in 500 ml of de-ionized water by sonication for 30 min using an ultrasonication bath. To this, Na<sub>2</sub>PdCl<sub>4</sub> solution [prepared by dissolving 90 mg (0.51mmol) of PdCl<sub>2</sub> and 60 mg (1.03 mmol) of NaCl in 15mL of water] was added. After stirring for 30 minutes, NaBH<sub>4</sub> solution [30 mg (0.79mmol) dissolved in 10

mL of deionized water] was slowly added dropwise and this mixture was stirred overnight at room temperature with the help of a mechanical overhead stirrer. The Pd immobilized  $\text{Fe}_3\text{O}_4@\text{PDA}$  nanoparticles were collected magnetically by using laboratory permanent magnet. The particles were washed thrice with water, ethanol and acetone. The as prepared Pd/ $\text{Fe}_3\text{O}_4@\text{PDA}$  catalyst was dried overnight at room temperature in a desiccator and later completely characterized by spectroscopic and analytical techniques. The loading of Palladium was found to be 3.88wt% as revealed by ICP-AES analysis.

#### **General experimental procedure for Suzuki reaction:**

To a 25mL round bottomed flask (backfilled with nitrogen) equipped with a Teflon coated magnetic bar, aryl halide (0.5 mmol) and arylboronic acid (0.55 mmol) were added. To this,  $\text{K}_2\text{CO}_3$  (1 mmol, 138mg) and Pd/ $\text{Fe}_3\text{O}_4@\text{PDA}$  (0.46 mol % of Pd) were added followed by 4mL of  $\text{H}_2\text{O}$ : EtOH (1:1). The reaction mixture was stirred for the indicated time at 80 °C for aryl iodides and 100°C for aryl bromides till the time taken for complete consumption of the reactants as confirmed by TLC, the solution was extracted four times with ethyl acetate ( $4 \times 10$  mL). The organic solvents were removed under pressure and the residue was column chromatographed using silica gel with petroleum ether/ethyl acetate as eluents to get the desired coupling product (most cases it was only filter column).

#### **Catalyst recyclability study:**

To a 25mL round bottomed flask (backfilled with nitrogen) equipped with a Teflon coated magnetic bar, aryl halide (0.5 mmol) and arylboronic acid (0.55 mmol) were added. To this,  $\text{K}_2\text{CO}_3$  (1 mmol, 138mg) and Pd/ $\text{Fe}_3\text{O}_4@\text{PDA}$  (0.46 mol % of Pd) were added followed by 4mL of  $\text{H}_2\text{O}$ : EtOH (1:1). The reaction mixture was stirred for the indicated time at 80°C. After consumption of the reactants as confirmed by TLC, the solution was extracted four times with ethyl acetate ( $4 \times 10$  mL). The organic solvents were removed under pressure and the residue was column chromatographed using silica gel with petroleum ether/ethyl acetate as eluents to get the desired coupling products (most cases it was only filter column). The magnetically recovered catalyst was washed with water and acetone, dried in a desiccator overnight and subsequently used for the next cycle. As such the catalyst was reused for five more cycles.

**Hot Test Experiment conditions under centrifugation conditions:**

To a 25mL round bottomed flask (backfilled with nitrogen) equipped with a Teflon coated magnetic bar, aryl halide (0.5 mmol) and arylboronic acid (0.55 mmol) were added. To this,  $K_2CO_3$  (1 mmol, 138mg) and Pd/Fe<sub>3</sub>O<sub>4</sub>@PDA (0.46 mol % of Pd) were added followed by 4mL of H<sub>2</sub>O: EtOH (1:1). The reaction was stirred for 2 hours at 80 °C. The reaction mixture was centrifuged at 3000 rpm on an ultracentrifuge machine for 30 minutes and the solution was filtered with 0.44 μm, PTFE syringe filter and the afforded solution was transferred to another flask and reaction was allowed to stir at 80 °C for 24 hours.

**Hot Test Experiment conditions under non-centrifugation conditions:**

To a 25mL round bottomed flask (backfilled with nitrogen) equipped with a Teflon coated magnetic bar, aryl halide (0.5 mmol) and arylboronic acid (0.55 mmol) were added. To this,  $K_2CO_3$  (1 mmol, 138mg) and Pd/Fe<sub>3</sub>O<sub>4</sub>@PDA (0.46 mol % of Pd) were added followed by 4mL of H<sub>2</sub>O: EtOH (1:1). The reaction was stirred for 2 hours at 80 °C. The reaction mixture was filtered with 0.44 μm, PTFE syringe filter and the afforded solution was transferred to another flask and reaction was allowed to stir at 80 °C for 24 hours.

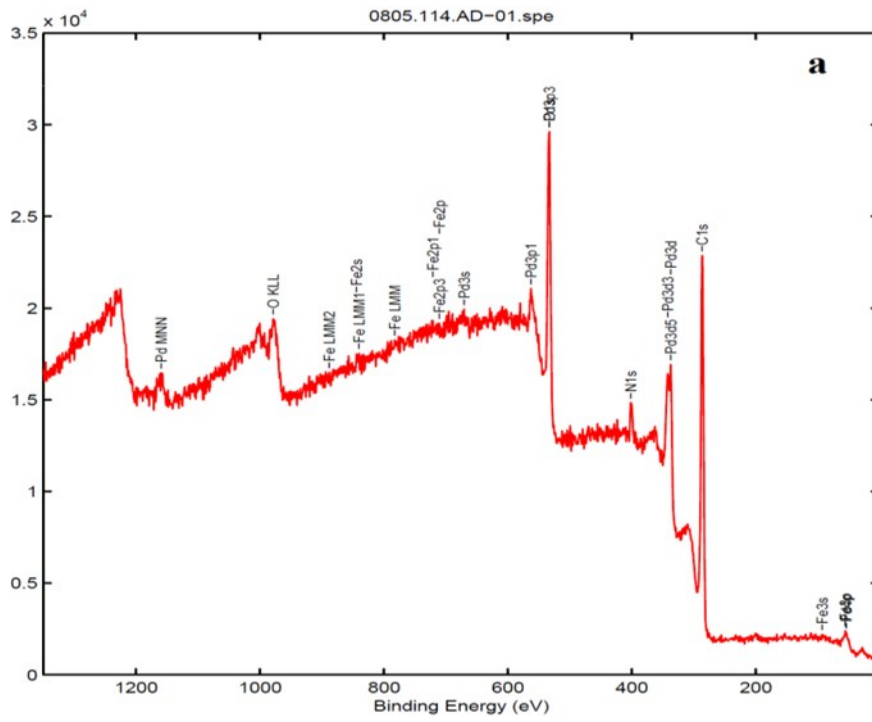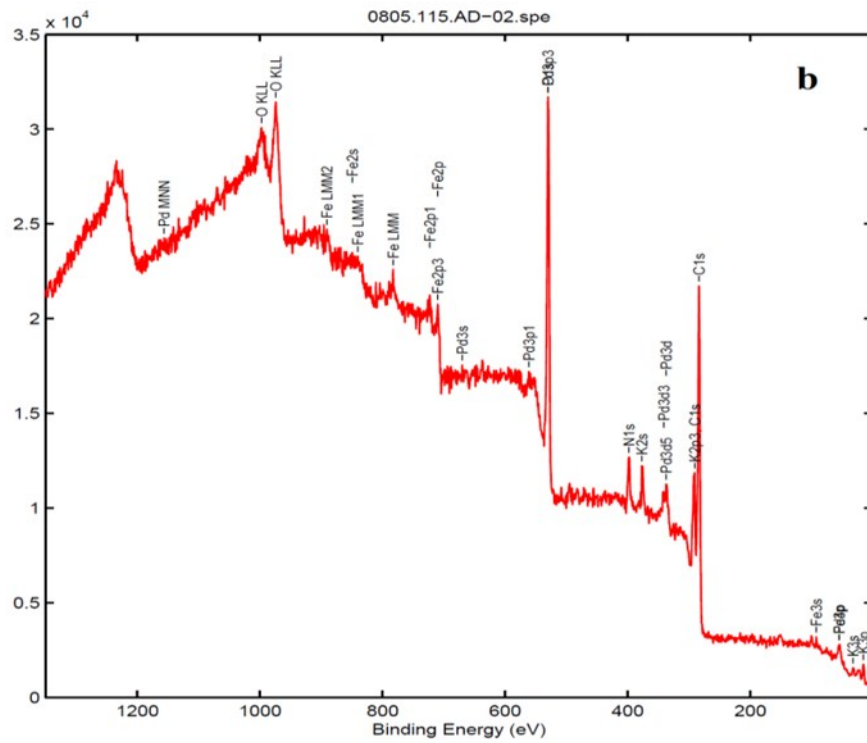

XPS of Pd/Fe<sub>3</sub>O<sub>4</sub>@PDA nanoparticles (a) native (b) after five cycles<sup>1</sup>

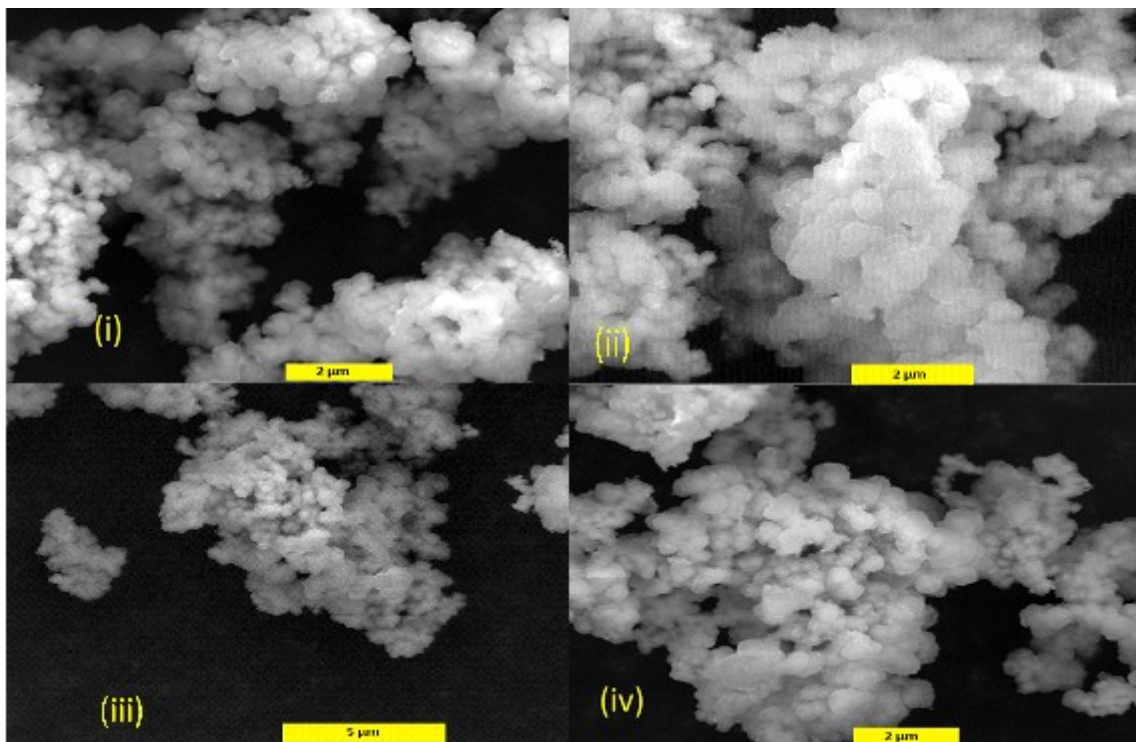

SEM images of Pd/PDA@Fe<sub>3</sub>O<sub>4</sub>: (i-ii) native (iii-iv) after five cycles.

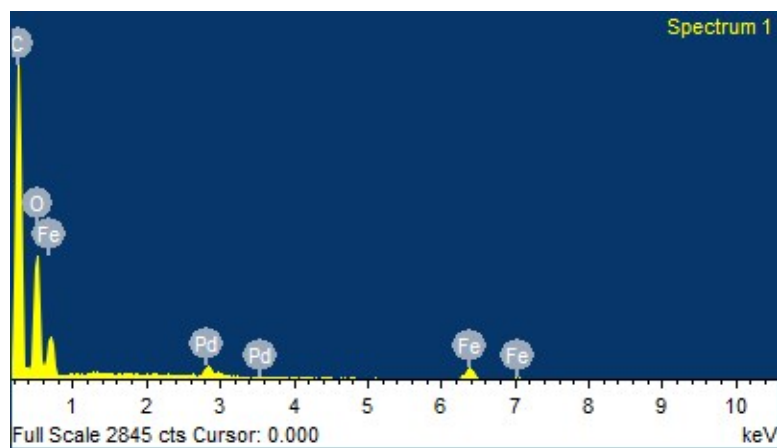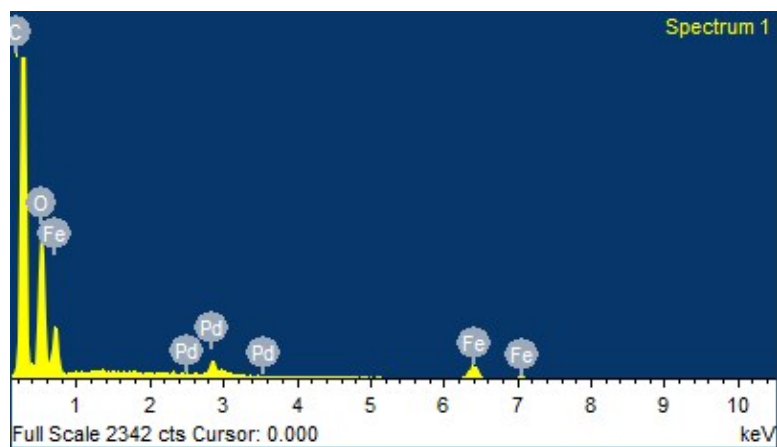

EDAX Spectra of native and recycled Pd/ Fe<sub>3</sub>O<sub>4</sub>@PDA

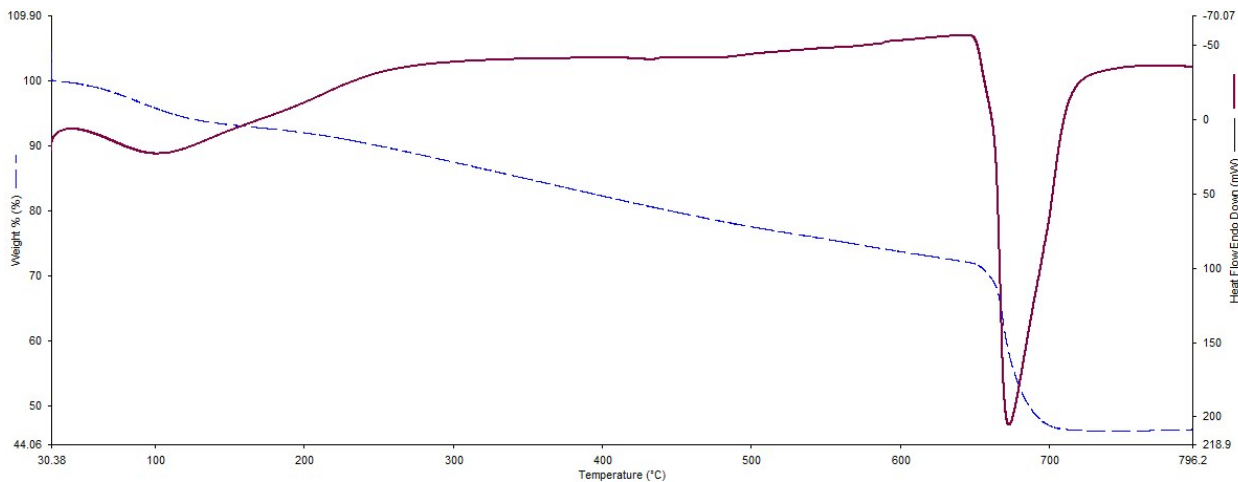

**DSC TGA of Pd/Fe<sub>3</sub>O<sub>4</sub>@PDA native catalyst**

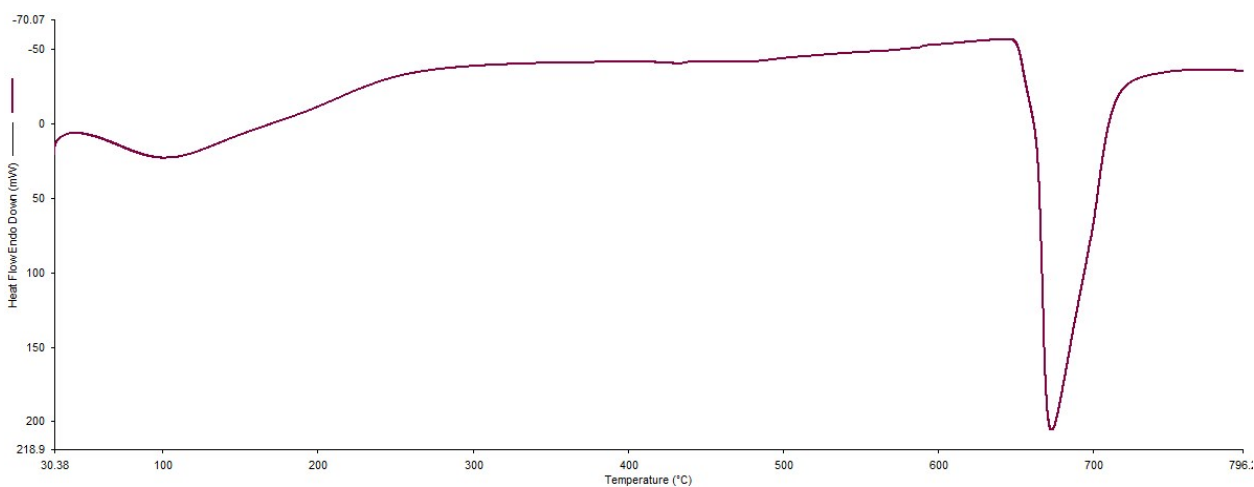

**DSC of Pd/Fe<sub>3</sub>O<sub>4</sub>@PDA native catalyst**

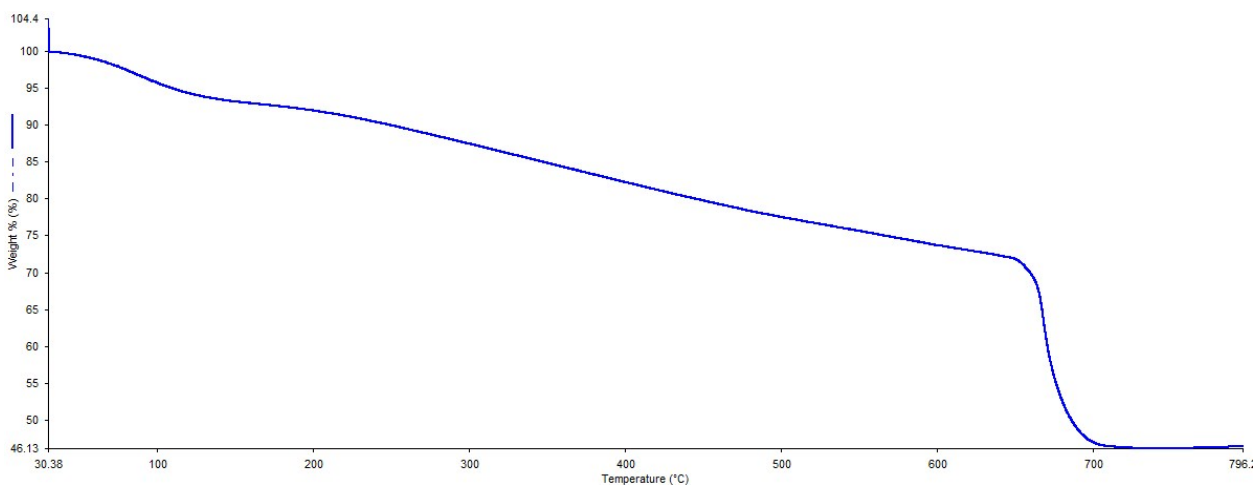

**TGA of Pd/Fe<sub>3</sub>O<sub>4</sub>@PDA native catalyst**

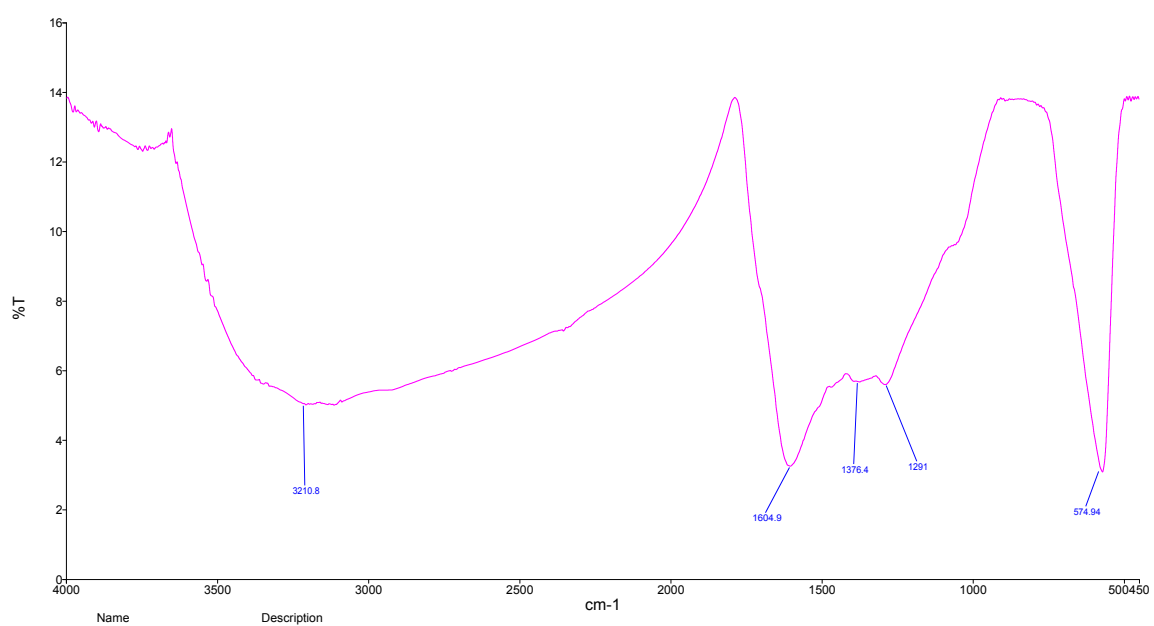

**FT-IR of native Pd/Fe<sub>3</sub>O<sub>4</sub>@PDA catalyst**

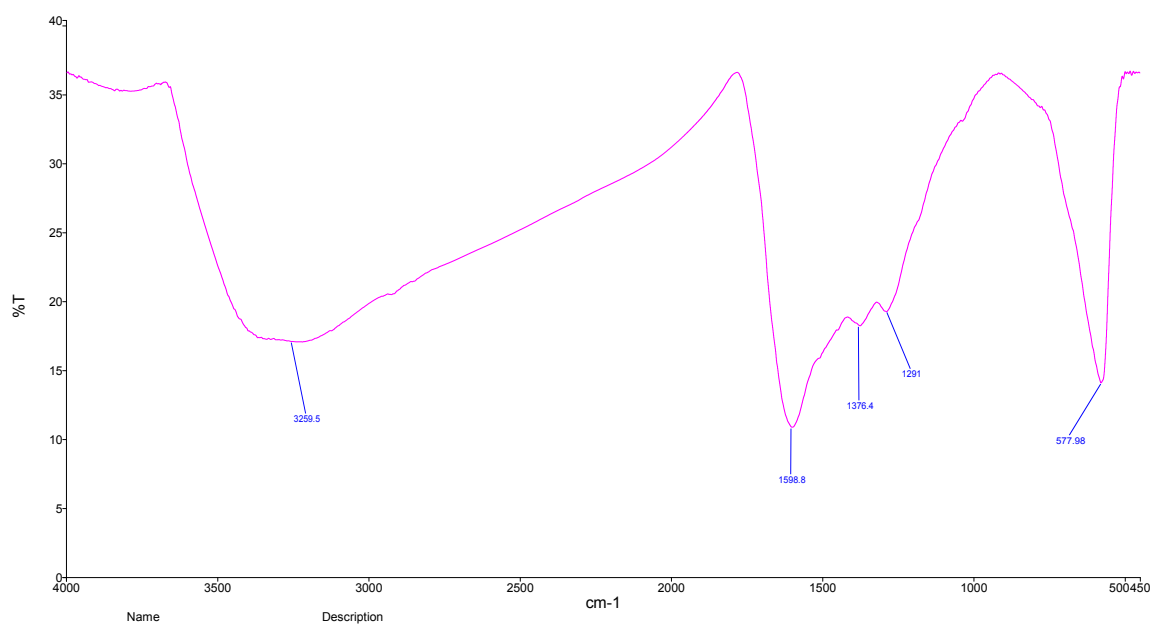

**FT-IR of recycled Pd/Fe<sub>3</sub>O<sub>4</sub>@PDA catalyst**

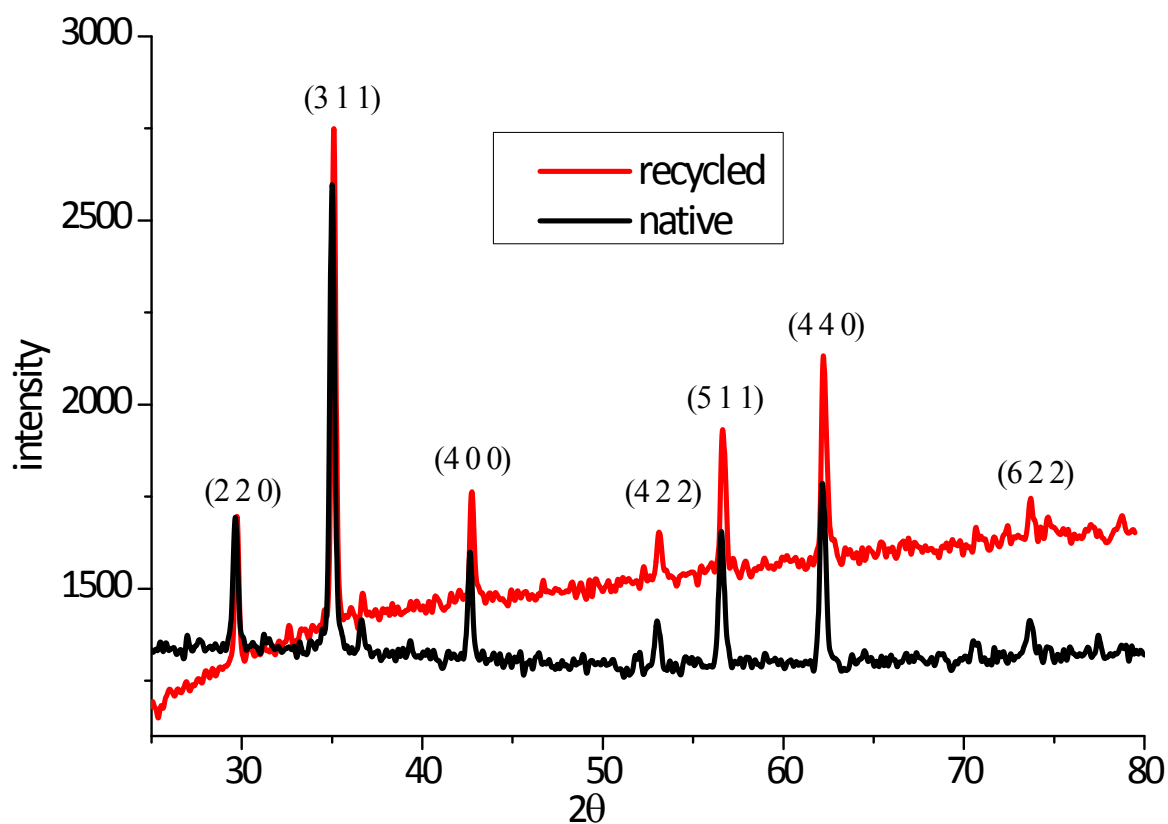

**X-ray powder diffractogram of the fresh and reused Pd/Fe<sub>3</sub>O<sub>4</sub>@PDA nanoparticles**

---

**General experimental procedure for Suzuki reaction: (with aryldiazonium tetrafluoroborate salts )**

To a 25mL round bottomed flask Teflon coated magnetic bar, aryl diazoniumtetrafluoroborate (0.5 mmol) and arylboronic acid (0.55 mmol) were added. To this 0.27 mol % of Pd were added followed by 4mL of Methanol. The reaction mixture was stirred for the indicated time at room temperature in air till the complete consumption of the reactants as confirmed by TLC. After completion of reaction 2ml of water added and solution was extracted four times with ethyl acetate (4 × 10 mL). The organic solvents were removed under pressure and the residue was column chromatographed using silica gel with petroleum ether/ethyl acetate as eluents to get the desired coupling product (most cases it was only filter column).



**Table** Optimization of reaction conditions of Suzuki cross-coupling of aryldiazonium salts with arylboronic acids by Pd/Fe<sub>3</sub>O<sub>4</sub>@PDA nanocatalyst<sup>a</sup>

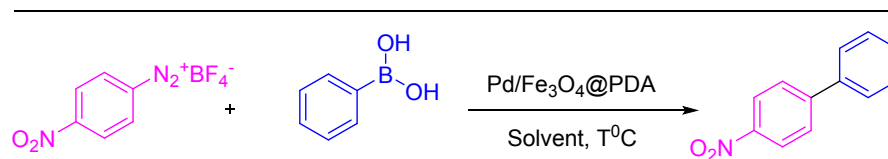

| Entry     | Solvent                         | Time (h) | Yield <sup>b</sup> (%) |
|-----------|---------------------------------|----------|------------------------|
| 1         | CH <sub>3</sub> CN              | 24       | 33                     |
| 2         | DMSO                            | 24       | 51                     |
| 3         | DMF                             | 24       | 46                     |
| 4         | CH <sub>2</sub> Cl <sub>2</sub> | 24       | 28                     |
| 5         | CHCl <sub>3</sub>               | 24       | 32                     |
| 6         | NMP                             | 24       | 38                     |
| 7         | THF                             | 24       | 24                     |
| 8         | 1,4-dioxane                     | 24       | 21                     |
| 9         | H <sub>2</sub> O                | 24       | 10                     |
| 10        | H <sub>2</sub> O                | 24       | 10 <sup>c</sup>        |
| 11        | EtOH:H <sub>2</sub> O(1:1)      | 24       | 26                     |
| 12        | EtOH                            | 3        | 15                     |
| 13        | EtOH                            | 24       | 63                     |
| <b>14</b> | <b>MeOH</b>                     | <b>3</b> | <b>85</b>              |
| 15        | MeOH                            | 24       | 85                     |
| 16        | MeOH                            | 24       | 60 <sup>d</sup>        |
| 17        | MeOH                            | 24       | 0 <sup>e</sup>         |

<sup>a</sup>Reaction conditions: phenylboronic acid (0.55 mmol), arenediazonium salts (0.5 mmol), Pd/Fe<sub>3</sub>O<sub>4</sub>@PDA (0.27 mol % of Pd).

<sup>b</sup>isolated yield.

<sup>c</sup>reaction temperature 60 °C

<sup>d</sup>Pd/Fe<sub>3</sub>O<sub>4</sub>@PDA (0.18 mol % of Pd)

<sup>e</sup>without catalyst

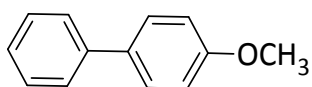

**4-Methoxy-1,1'-biphenyl (1a)**<sup>2</sup>

<sup>1</sup>H NMR (400 MHz, CDCl<sub>3</sub>) δ 7.63 – 7.56 (m, 4H), 7.50 – 7.44 (m, 2H), 7.39 – 7.33 (m, 1H), 7.06 – 7.01 (m, 2H), 3.90 (s, 3H). <sup>13</sup>C NMR (101 MHz, CDCl<sub>3</sub>) δ 159.19, 140.87, 133.82, 128.77, 128.20, 126.78, 126.71, 114.25, 55.37.

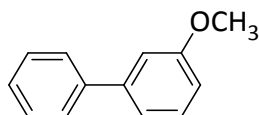

**3-Methoxy-1,1'-biphenyl (1b)**<sup>2</sup>

<sup>1</sup>H NMR (400 MHz, CDCl<sub>3</sub>) δ 7.70 – 7.63 (m, 2H), 7.54 – 7.37 (m, 4H), 7.25 (m, *J* = 17.0, 12.6, 11.9 Hz, 2H), 6.97 (dd, *J* = 8.2, 2.6 Hz, 1H), 3.92 (s, 3H). <sup>13</sup>C NMR (101 MHz, CDCl<sub>3</sub>) δ 160.01, 142.83, 141.17, 129.80, 128.78, 127.46, 127.25, 119.74, 112.97, 112.74, 55.33.

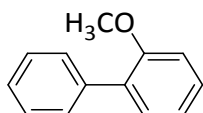

**2-Methoxy-1,1'-biphenyl (1c)**<sup>2</sup>

<sup>1</sup>H NMR (400 MHz, CDCl<sub>3</sub>) δ 7.61 – 7.56 (m, 2H), 7.46 (t, *J* = 7.6 Hz, 2H), 7.37 (m, *J* = 7.0, 4.4, 2.5 Hz, 3H), 7.12 – 7.01 (m, 2H), 3.86 (s, 3H). <sup>13</sup>C NMR (126 MHz, CDCl<sub>3</sub>) δ 156.48, 138.56, 130.89, 130.75, 129.55, 128.61, 127.97, 126.91, 120.84, 111.27, 55.56.

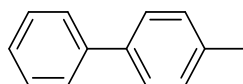

**4-Methyl-1,1'-biphenyl (1d)**<sup>2</sup>

<sup>1</sup>H NMR (400 MHz, CDCl<sub>3</sub>) δ 7.72 – 7.63 (m, 2H), 7.57 (t, *J* = 7.4 Hz, 2H), 7.78 – 7.23 (m, 2H), 7.54 – 7.47 (m, 1H), 7.44 – 7.37 (m, 2H), 2.48 (s, 3H). <sup>13</sup>C NMR (101 MHz, CDCl<sub>3</sub>) δ 141.24, 138.43, 137.07, 129.55, 128.78, 127.06, 21.16.

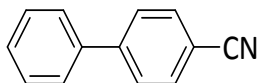

**[1,1'-Biphenyl]-4-carbonitrile (1e)**<sup>3</sup>

<sup>1</sup>H NMR (400 MHz, CDCl<sub>3</sub>) δ 7.73 (m, *J* = 8.5, 4.2 Hz, 4H), 7.62 (dd, *J* = 5.2, 3.3 Hz, 2H), 7.55 – 7.38 (m, 3H). <sup>13</sup>C NMR (101 MHz, CDCl<sub>3</sub>) δ 145.70, 139.20, 132.61, 129.13, 128.68, 127.75, 127.24, 118.95, 110.95.

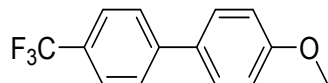

**4-Methoxy-4'-(trifluoromethyl)-1,1'-biphenyl (1f)** <sup>4</sup>

<sup>1</sup>H NMR (400 MHz, CDCl<sub>3</sub>)  $\delta$  7.64 (m, 4H), 7.53 (d,  $J$  = 8.7 Hz, 2H), 6.99 (d,  $J$  = 8.7 Hz, 2H), 3.85 (s, 3H). <sup>13</sup>C NMR (101 MHz, CDCl<sub>3</sub>)  $\delta$  159.81, 144.24, 132.14, 128.30, 126.82, 125.68, 125.64, 125.60, 114.39, 55.34.

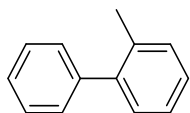

**2-Methyl-1,1'-biphenyl (1g)** <sup>2</sup>

<sup>1</sup>H NMR (400 MHz, CDCl<sub>3</sub>)  $\delta$  7.51 – 7.25 (m, 9H), 2.33 (s, 3H). <sup>13</sup>C NMR (101 MHz, CDCl<sub>3</sub>)  $\delta$  142.00, 141.97, 135.37, 130.33, 129.82, 129.22, 128.78, 128.09, 127.27, 127.20, 126.78, 125.78, 20.49.

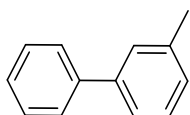

**3-Methyl-1,1'-biphenyl (1h)** <sup>2</sup>

<sup>1</sup>H NMR (400 MHz, CDCl<sub>3</sub>)  $\delta$  7.67 – 7.60 (m, 2H), 7.42 (m,  $J$  = 10.6, 7.4, 1.5 Hz, 6H), 7.21 (d,  $J$  = 7.6 Hz, 1H), 2.47 (s, 3H). <sup>13</sup>C NMR (126 MHz, CDCl<sub>3</sub>)  $\delta$  141.37, 141.25, 138.32, 128.69, 128.66, 127.99, 127.18, 124.27, 21.55.

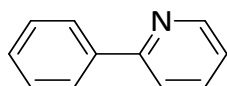

**2-Phenylpyridine (1i)** <sup>5</sup>

<sup>1</sup>H NMR (500 MHz, CDCl<sub>3</sub>)  $\delta$  8.72 – 8.67 (m, 1H), 8.02 – 7.96 (m, 2H), 7.79 – 7.69 (m, 2H), 7.51 – 7.38 (m, 3H), 7.27 – 7.18 (m, 1H). <sup>13</sup>C NMR (101 MHz, CDCl<sub>3</sub>)  $\delta$  157.49, 149.69, 139.43, 136.76, 128.97, 128.77, 126.94, 122.12, 120.60.

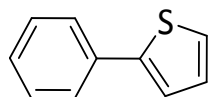

**2-Phenylthiophene (1j)** <sup>6</sup>

<sup>1</sup>H NMR (400 MHz, CDCl<sub>3</sub>)  $\delta$  7.69 – 7.62 (m, 2H), 7.46 – 7.27 (m, 5H), 7.12 (dd,  $J$  = 5.0, 3.6 Hz, 1H). <sup>13</sup>C NMR (101 MHz, CDCl<sub>3</sub>)  $\delta$  144.47, 134.44, 128.91, 128.14, 127.48, 125.88, 124.82, 123.10.

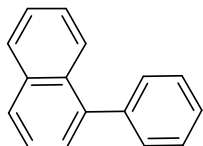

**1-Phenylnaphthalene (1k)** <sup>6</sup>

<sup>1</sup>H NMR (400 MHz, CDCl<sub>3</sub>) δ 8.00 – 7.86 (m, 3H), 7.61 – 7.44 (m, 9H). <sup>13</sup>C NMR (101 MHz, CDCl<sub>3</sub>) δ 140.79, 140.29, 133.82, 131.65, 130.10, 128.28, 127.65, 127.26, 126.95, 126.04, 125.78, 125.40.

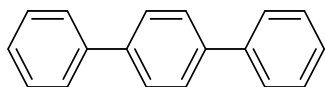

**1,1':4',1''-Terphenyl (1l)** <sup>7</sup>

<sup>1</sup>H NMR (500 MHz, CDCl<sub>3</sub>) δ 7.69 – 7.62 (m, 8H), 7.49 – 7.43 (m, 4H), 7.39 – 7.34 (m, 2H). <sup>13</sup>C NMR (101 MHz, CDCl<sub>3</sub>) δ 140.73, 140.15, 128.84, 127.53, 127.37, 127.08.

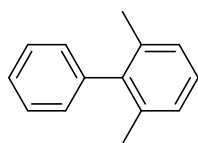

**2,6-dimethyl-1,1'-biphenyl (1m)** <sup>11</sup>

<sup>1</sup>H NMR (400 MHz, CDCl<sub>3</sub>) δ 7.43 (m, *J* = 45.4, 27.3, 7.7 Hz, 6H), 6.98 (d, *J* = 8.8 Hz, 2H), 3.84 (s, 6H). <sup>13</sup>C NMR (101 MHz, CDCl<sub>3</sub>) δ 159.10, 140.79, 133.74, 128.70, 128.13, 126.71, 126.63, 114.17, 55.32.

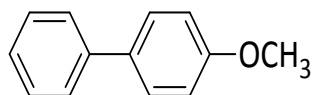

**4-Methoxy-1,1'-biphenyl (1n)** <sup>2</sup>

<sup>1</sup>H NMR (400 MHz, CDCl<sub>3</sub>) δ 7.66 – 7.55 (m, 4H), 7.47 (m, *J* = 7.6, 3.5 Hz, 2H), 7.36 (m, *J* = 10.9, 5.6, 2.6 Hz, 1H), 7.03 (dd, *J* = 8.7, 3.2 Hz, 2H), 3.90 (s, *J* = 1.8 Hz, 3H). <sup>13</sup>C NMR (101 MHz, CDCl<sub>3</sub>) δ 159.20, 140.87, 133.82, 128.77, 128.19, 126.78, 126.70, 114.26, 55.37.

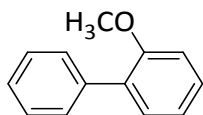

**2-Methoxy-1,1'-biphenyl (1o)** <sup>2</sup>

<sup>1</sup>H NMR (400 MHz, CDCl<sub>3</sub>) δ 7.62 – 7.56 (m, 2H), 7.47 (dd, *J* = 10.3, 4.7 Hz, 2H), 7.38 (m, *J* = 7.6, 4.2, 1.1 Hz, 3H), 7.14 – 7.01 (m, 2H), 3.86 (s, 3H). <sup>13</sup>C NMR (126 MHz, CDCl<sub>3</sub>) δ 156.47, 138.54, 130.88, 130.74, 129.53, 128.59, 127.96, 126.89, 120.82, 111.25, 55.55.

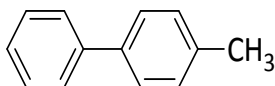

**4-Methyl-1,1'-biphenyl (1p)**<sup>2</sup>

<sup>1</sup>H NMR (400 MHz, CDCl<sub>3</sub>) δ 7.69 – 7.25 (m, 9H), 2.45 (s, 3H). <sup>13</sup>C NMR (101 MHz, CDCl<sub>3</sub>) δ 141.16, 138.36, 137.03, 129.50, 128.73, 126.99, 21.13.

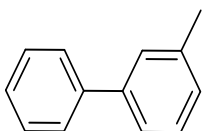

**3-Methyl-1,1'-biphenyl (1q)**<sup>2</sup>

<sup>1</sup>H NMR (400 MHz, CDCl<sub>3</sub>) δ 7.66 – 7.58 (m, 2H), 7.42 (m, *J* = 29.7, 11.1, 4.6 Hz, 6H), 7.20 (d, *J* = 7.3 Hz, 1H), 2.46 (s, 3H). <sup>13</sup>C NMR (101 MHz, CDCl<sub>3</sub>) δ 141.39, 141.27, 138.34, 128.71, 128.68, 128.00, 127.18, 124.30, 21.57.

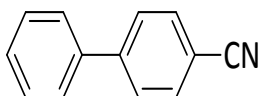

**[1,1'-Biphenyl]-4-carbonitrile (1r)**<sup>3</sup>

<sup>1</sup>H NMR (400 MHz, CDCl<sub>3</sub>) δ 7.79 – 7.68 (m, 4H), 7.66 – 7.57 (m, 2H), 7.56 – 7.42 (m, 3H). <sup>13</sup>C NMR (101 MHz, CDCl<sub>3</sub>) δ 145.70, 139.20, 132.61, 129.13, 128.68, 127.75, 127.25, 118.96, 110.94.

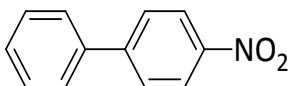

**4-Nitro-1,1'-biphenyl (1s)**<sup>3</sup>

<sup>1</sup>H NMR (400 MHz, CDCl<sub>3</sub>) δ 8.32 (d, *J* = 7.0 Hz, 2H), 7.76 (d, *J* = 7.2 Hz, 2H), 7.64 (t, *J* = 9.7 Hz, 2H), 7.57 – 7.43 (m, 3H). <sup>13</sup>C NMR (101 MHz, CDCl<sub>3</sub>) δ 147.64, 147.11, 138.78, 129.18, 128.95, 127.81, 127.40, 124.12.

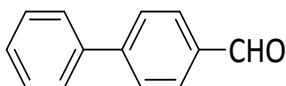

**[1,1'-Biphenyl]-4-carbaldehyde (1t)**<sup>5</sup>

<sup>1</sup>H NMR (400 MHz, CDCl<sub>3</sub>) δ 10.09 (s, 1H), 7.98 (d, *J* = 8.2 Hz, 2H), 7.78 (d, *J* = 8.3 Hz, 2H), 7.67 (dd, *J* = 5.3, 3.4 Hz, 2H), 7.55 – 7.41 (m, 3H). <sup>13</sup>C NMR (126 MHz, CDCl<sub>3</sub>) δ 191.89, 147.19, 139.71, 135.21, 130.25, 129.01, 128.46, 127.68, 127.36.

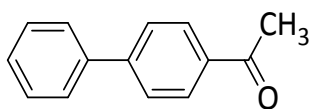

**1-([1,1'-Biphenyl]-4-yl)ethanone (1u)** <sup>8</sup>

<sup>1</sup>H NMR (400 MHz, CDCl<sub>3</sub>)  $\delta$  8.11 – 8.02 (m, 2H), 7.76 – 7.62 (m, 4H), 7.54 – 7.39 (m, 3H), 2.67 (s, 3H). <sup>13</sup>C NMR (101 MHz, CDCl<sub>3</sub>)  $\delta$  197.76, 145.80, 139.90, 135.88, 128.97, 128.93, 128.25, 127.29, 127.24, 26.67.

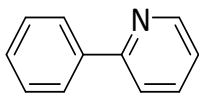

**2-Phenylpyridine (1v)** <sup>5</sup>

<sup>1</sup>H NMR (400 MHz, CDCl<sub>3</sub>)  $\delta$  8.73 (d,  $J$  = 4.8 Hz, 1H), 8.03 (d,  $J$  = 7.2 Hz, 2H), 7.82 – 7.72 (m, 2H), 7.58 – 7.39 (m, 3H), 7.25 (m,  $J$  = 8.2, 7.4, 5.5 Hz, 1H). <sup>13</sup>C NMR (101 MHz, CDCl<sub>3</sub>)  $\delta$  157.51, 149.81, 149.59, 139.45, 136.87, 136.60, 128.86, 128.66, 127.08, 126.79, 122.11, 121.75, 120.72, 120.58, 120.44.

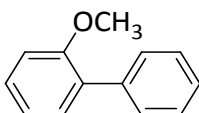

**2-Methoxy-1,1'-biphenyl (1w)** <sup>2</sup>

<sup>1</sup>H NMR (400 MHz, CDCl<sub>3</sub>)  $\delta$  7.60 – 7.54 (m, 2H), 7.45 (t,  $J$  = 7.5 Hz, 2H), 7.40 – 7.33 (m, 3H), 7.11 – 6.99 (m, 2H), 3.85 (s, 3H). <sup>13</sup>C NMR (126 MHz, CDCl<sub>3</sub>)  $\delta$  156.47, 138.55, 130.89, 130.74, 129.54, 128.60, 127.96, 126.90, 120.83, 111.25, 55.56.

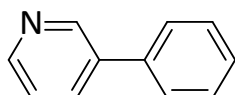

**3-Phenylpyridine (1x)** <sup>9</sup>

<sup>1</sup>H NMR (400 MHz, CDCl<sub>3</sub>)  $\delta$  8.88 (s, 1H), 8.62 (d,  $J$  = 3.7 Hz, 1H), 7.94 – 7.86 (m, 1H), 7.66 – 7.35 (m, 6H). <sup>13</sup>C NMR (101 MHz, CDCl<sub>3</sub>)  $\delta$  148.54, 148.39, 148.30, 148.21, 137.85, 136.71, 134.56, 134.28, 129.20, 128.11, 127.28, 127.05, 123.60.

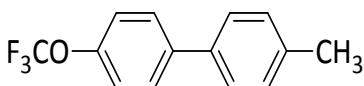

**4-Methyl-4'-(trifluoromethoxy)-1,1'-biphenyl (1y)** <sup>10</sup>

<sup>1</sup>H NMR (400 MHz, CDCl<sub>3</sub>)  $\delta$  7.62 (d,  $J$  = 8.7 Hz, 2H), 7.50 (d,  $J$  = 8.1 Hz, 2H), 7.30 (dd,  $J$  = 8.0, 3.9 Hz, 4H), 2.44 (s, 3H). <sup>13</sup>C NMR (101 MHz, CDCl<sub>3</sub>)  $\delta$  148.48, 139.95, 137.55, 137.00, 129.63, 128.24, 126.96, 121.22, 21.10.

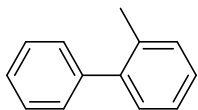

**2-methyl-1,1'-biphenyl (1z)**<sup>2</sup>

<sup>1</sup>H NMR (400 MHz, CDCl<sub>3</sub>) δ 7.48 – 7.23 (m, 9H), 2.30 (s, 3H). <sup>13</sup>C NMR (101 MHz, CDCl<sub>3</sub>) δ 141.95, 141.92, 135.33, 130.30, 129.79, 129.19, 128.06, 127.24, 126.75, 125.75, 20.48.

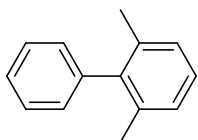

**2,6-dimethyl-1,1'-biphenyl (1aa)**<sup>11</sup>

<sup>1</sup>H NMR (400 MHz, CDCl<sub>3</sub>) δ 7.51 – 7.19 (m, 6H), 6.65 (d, *J* = 8.4 Hz, 2H), 3.72 (s, 6H). <sup>13</sup>C NMR (101 MHz, CDCl<sub>3</sub>) δ 157.63, 134.09, 130.86, 128.61, 127.64, 126.74, 104.16, 55.89.

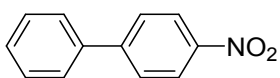

**4-nitro-1,1'-biphenyl (1ab)**<sup>12</sup>

<sup>1</sup>H NMR (400 MHz, CDCl<sub>3</sub>) δ 8.28 (d, *J* = 8.6 Hz, 2H), 7.78 – 7.37 (m, 7H). <sup>13</sup>C NMR (101 MHz, CDCl<sub>3</sub>) δ 147.59, 147.03, 138.72, 129.12, 128.89, 127.76, 127.35, 124.07.

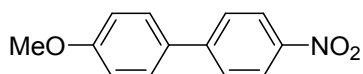

**4-methoxy-4'-nitro-1,1'-biphenyl (1ac)**<sup>12</sup>

<sup>1</sup>H NMR (400 MHz, CDCl<sub>3</sub>) δ 8.25 (d, *J* = 8.3 Hz, 2H), 7.61 (dd, *J* = 43.6, 8.2 Hz, 4H), 7.00 (d, *J* = 8.2 Hz, 2H), 3.85 (s, 3H). <sup>13</sup>C NMR (101 MHz, CDCl<sub>3</sub>) δ 160.39, 147.17, 146.49, 131.03, 128.53, 127.03, 124.11, 114.56, 55.40.

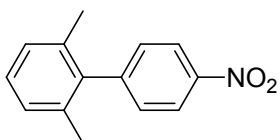

**2,6-dimethyl-4'-nitro-1,1'-biphenyl (1ad)**<sup>12</sup>

<sup>1</sup>H NMR (400 MHz, CDCl<sub>3</sub>) δ 8.31 (d, *J* = 9.0 Hz, 2H), 7.85 (dd, *J* = 55.9, 9.0 Hz, 3H), 6.56 (dd, *J* = 11.7, 5.5 Hz, 2H), 4.01 (s, 3H), 3.89 (s, 3H). <sup>13</sup>C NMR (101 MHz, CDCl<sub>3</sub>) δ 147.89, 145.67, 139.26, 136.83, 130.90, 128.80, 127.44, 123.06, 20.51.

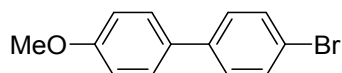

**4-bromo-4'-methoxy-1,1'-biphenyl (1ae)**<sup>13</sup>

<sup>1</sup>H NMR (400 MHz, CDCl<sub>3</sub>)  $\delta$  7.55 – 7.35 (m, 6H), 6.95 (d,  $J$  = 8.6 Hz, 2H), 3.83 (s, 3H). <sup>13</sup>C NMR (101 MHz, CDCl<sub>3</sub>)  $\delta$  159.35, 139.69, 132.44, 131.75, 128.26, 127.95, 120.75, 114.29, 55.34.

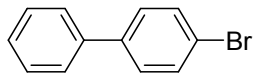

**4-bromo-1,1'-biphenyl (1af)**<sup>14</sup>

<sup>1</sup>H NMR (400 MHz, CDCl<sub>3</sub>)  $\delta$  7.63 – 7.30 (m, 9H). <sup>13</sup>C NMR (101 MHz, CDCl<sub>3</sub>)  $\delta$  139.95, 139.63, 133.34, 128.88, 128.85, 128.36, 127.56, 126.96.

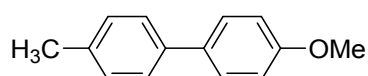

**4-methoxy-4'-methyl-1,1'-biphenyl (1ag)**<sup>15</sup>

<sup>1</sup>H NMR (400 MHz, CDCl<sub>3</sub>)  $\delta$  7.58 – 7.42 (m, 4H), 7.23 (d,  $J$  = 7.8 Hz, 2H), 7.02 – 6.91 (m, 2H), 3.84 (s, 3H), 2.39 (s, 3H). <sup>13</sup>C NMR (101 MHz, CDCl<sub>3</sub>)  $\delta$  158.91, 137.94, 136.33, 133.72, 129.42, 127.93, 126.56, 114.14, 55.31, 21.04.

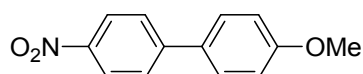

**4-methoxy-4'-nitro-1,1'-biphenyl (1ah)**<sup>12</sup>

<sup>1</sup>H NMR (400 MHz, CDCl<sub>3</sub>)  $\delta$  8.24 (d,  $J$  = 8.4 Hz, 2H), 7.61 (dd,  $J$  = 43.2, 8.5 Hz, 4H), 6.99 (d,  $J$  = 8.5 Hz, 2H), 3.85 (s, 3H). <sup>13</sup>C NMR (101 MHz, CDCl<sub>3</sub>)  $\delta$  160.39, 147.16, 146.48, 131.01, 128.53, 127.02, 124.11, 114.56, 55.40.

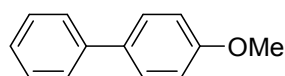

**4-methoxy-1,1'-biphenyl (1ai)**<sup>12</sup>

<sup>1</sup>H NMR (400 MHz, CDCl<sub>3</sub>)  $\delta$  7.43 (m,  $J$  = 45.4, 27.3, 7.7 Hz, 7H), 6.98 (d,  $J$  = 8.8 Hz, 2H), 3.84 (s, 3H). <sup>13</sup>C NMR (101 MHz, CDCl<sub>3</sub>)  $\delta$  159.10, 140.79, 133.74, 128.70, 128.13, 126.71, 126.63, 114.17, 55.32.

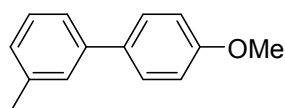

**4-methoxy-3-methyl-1,1'-biphenyl (1aj)**<sup>16</sup>

<sup>1</sup>H NMR (400 MHz, CDCl<sub>3</sub>)  $\delta$  7.52 (d,  $J$  = 8.5 Hz, 2H), 7.39 – 7.27 (m, 3H), 7.12 (d,  $J$  = 7.0 Hz, 1H),



6.96 (d,  $J = 8.5$  Hz, 2H), 3.84 (s, 3H), 2.41 (s, 3H).  $^{13}\text{C}$  NMR (101 MHz,  $\text{CDCl}_3$ )  $\delta$  159.03, 140.78, 138.24, 133.86, 128.60, 128.13, 127.53, 127.39, 123.82, 114.10, 55.31, 21.54.

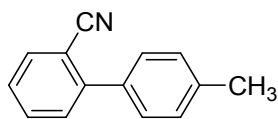

**4'-Methyl-[1, 1'-biphenyl]-2-carbonitrile (1ak)**<sup>10</sup>

$^1\text{H}$  NMR (400 MHz,  $\text{CDCl}_3$ )  $\delta$  7.74 (d,  $J = 7.7$  Hz, 1H), 7.61 (dd,  $J = 12.1, 4.5$  Hz, 1H), 7.53 – 7.37 (m, 4H), 7.33 – 7.23 (m, 3H), 2.41 (s, 3H).  $^{13}\text{C}$  NMR (126 MHz,  $\text{CDCl}_3$ )  $\delta$  145.53, 138.68, 135.27, 133.70, 132.73, 129.96, 129.43, 128.60, 127.25, 118.84, 111.21, 21.24.

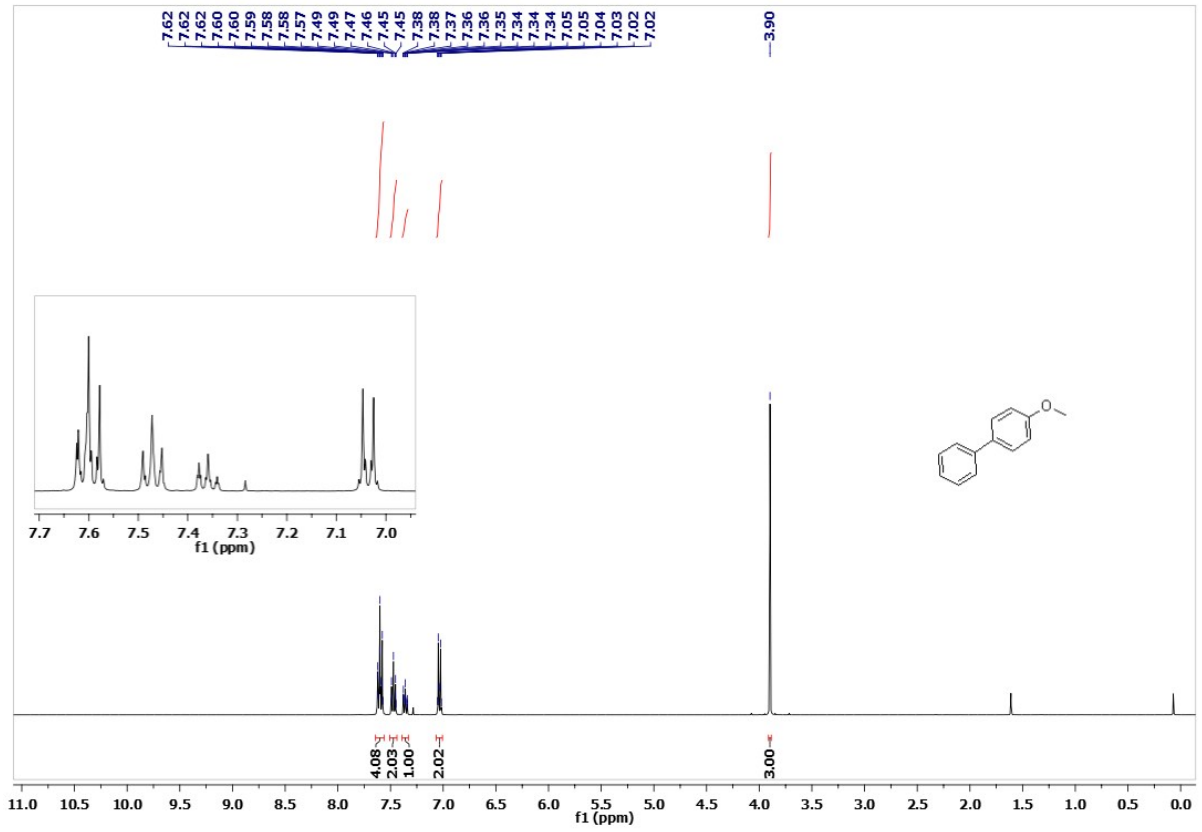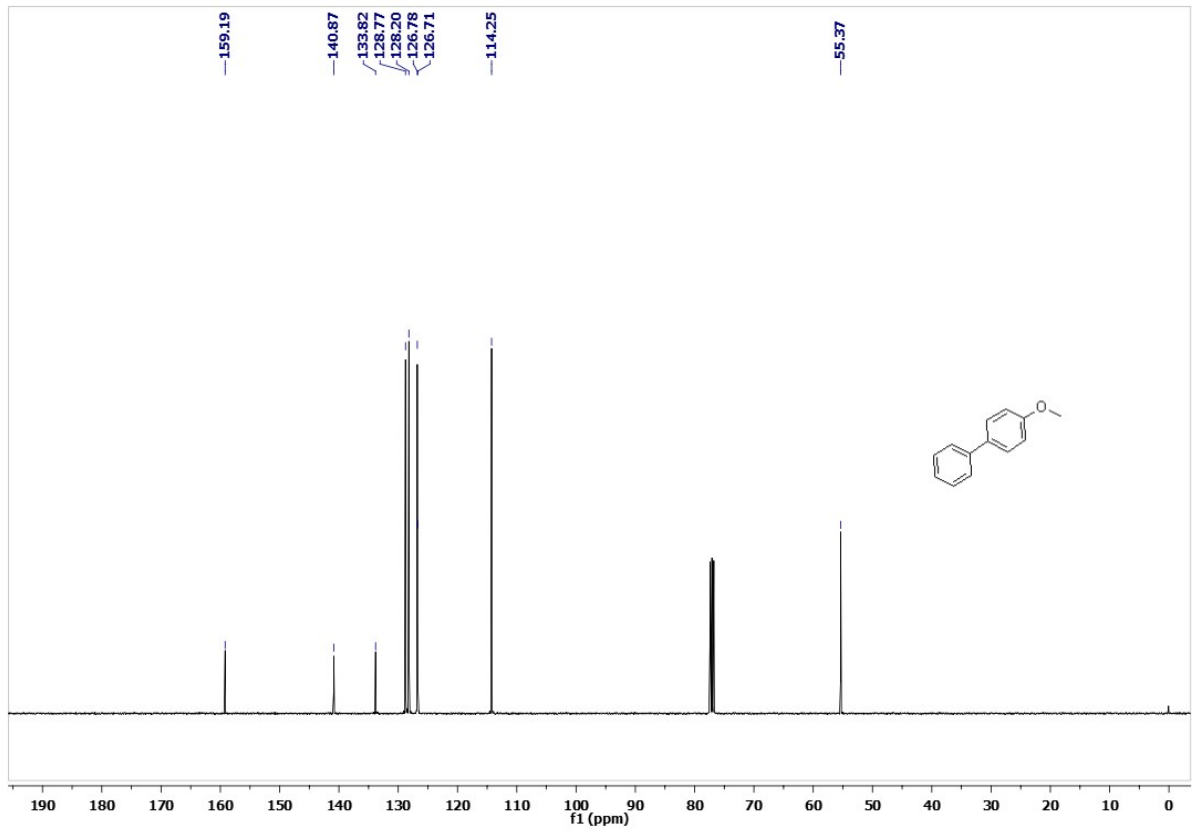

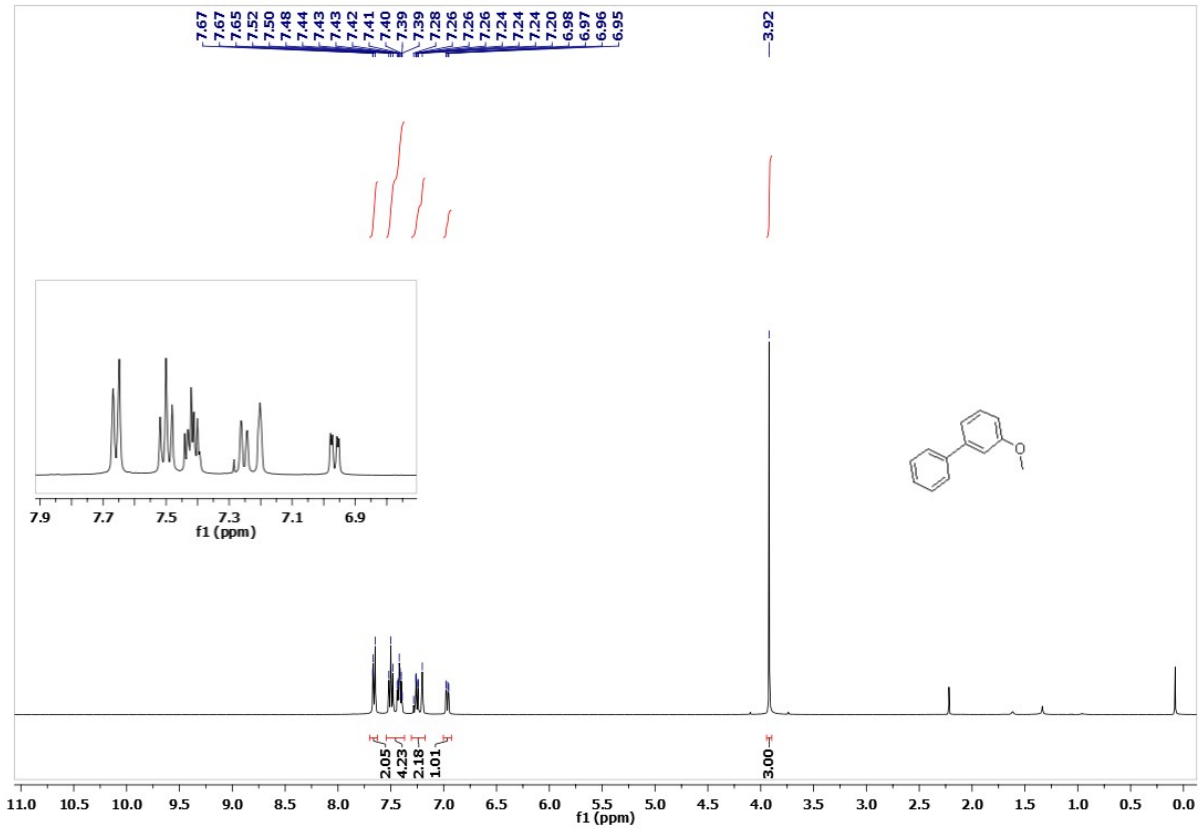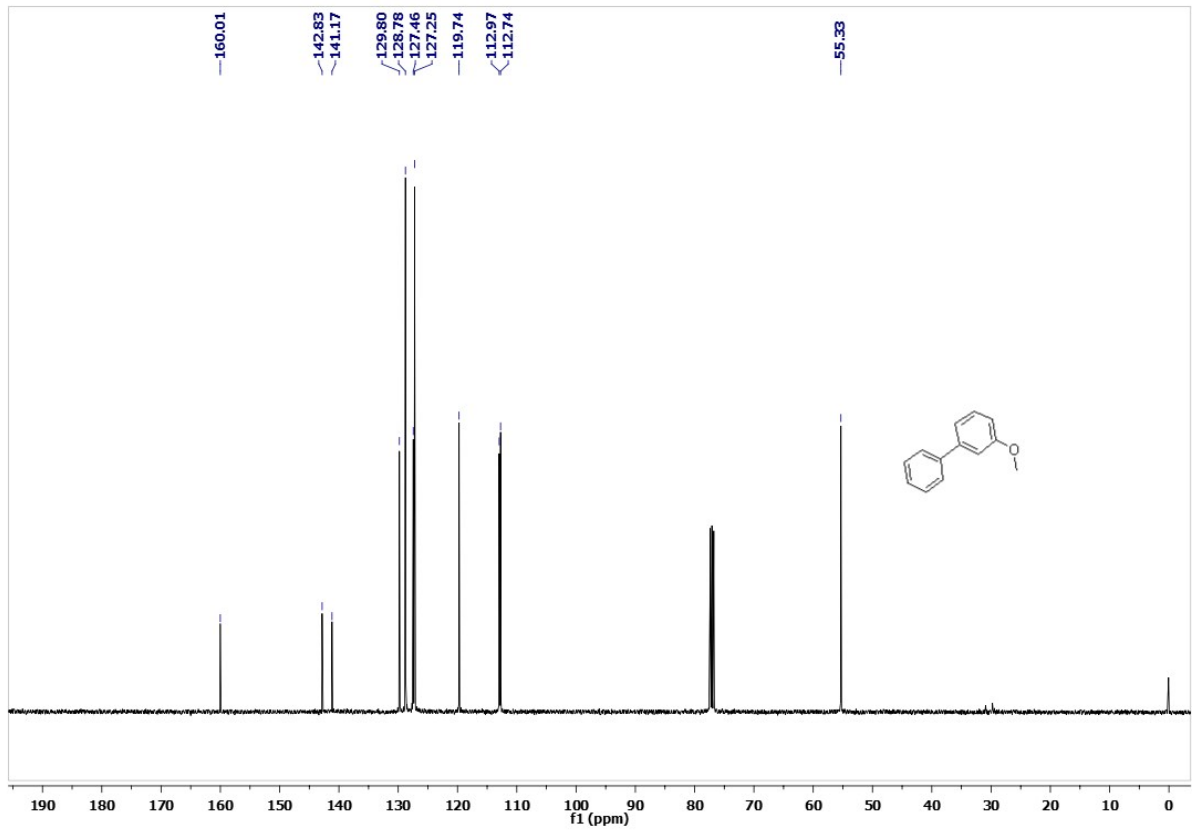

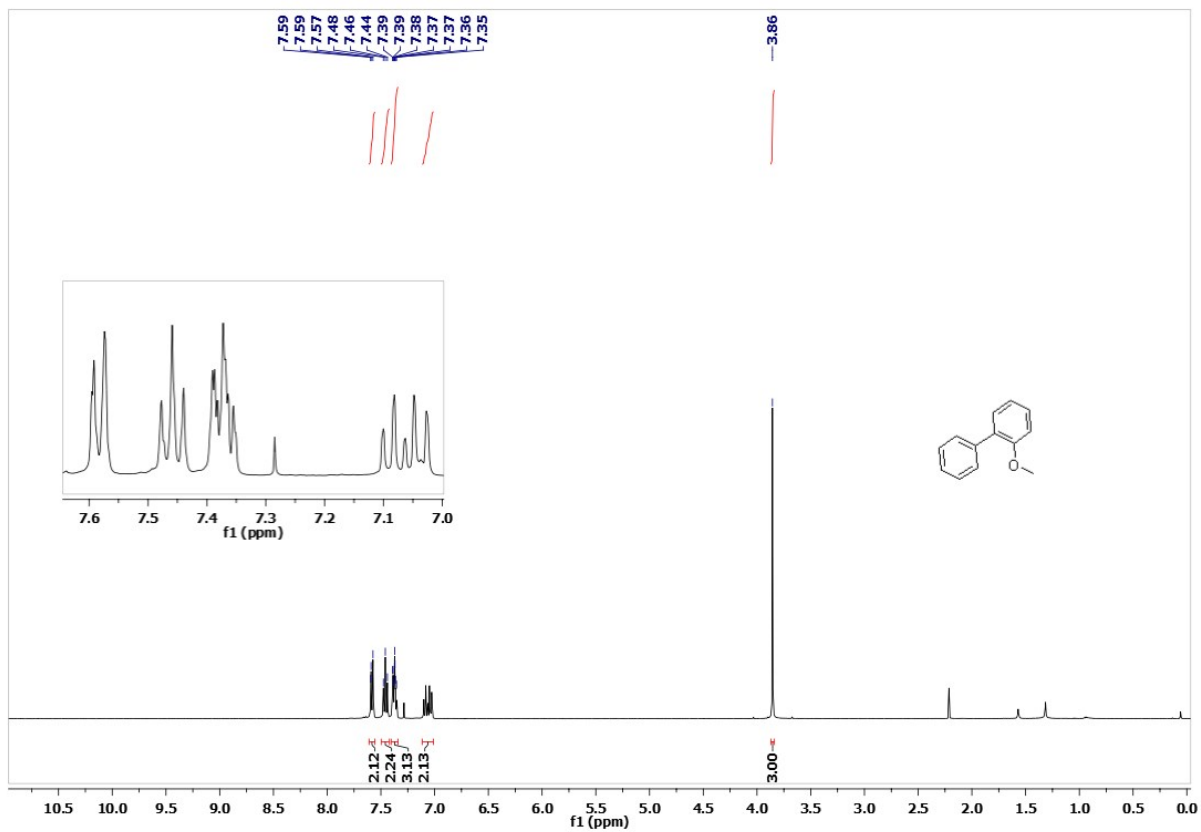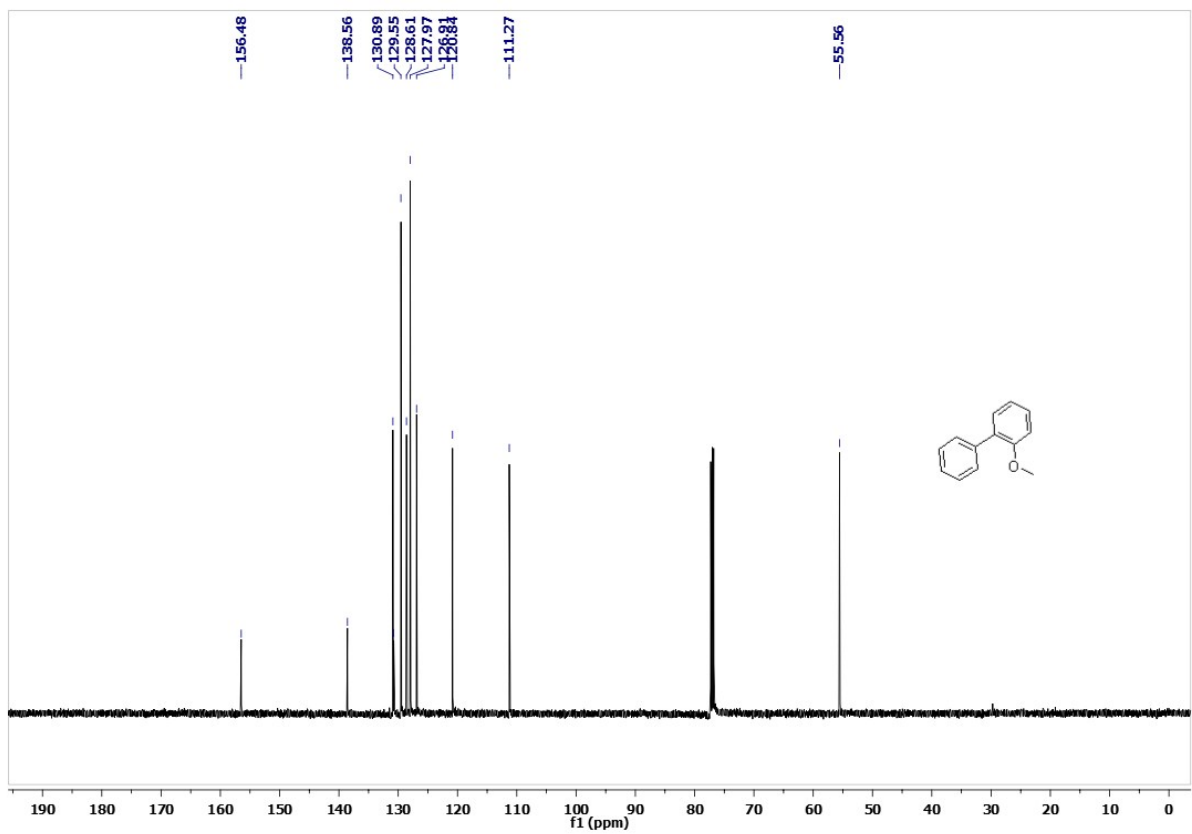

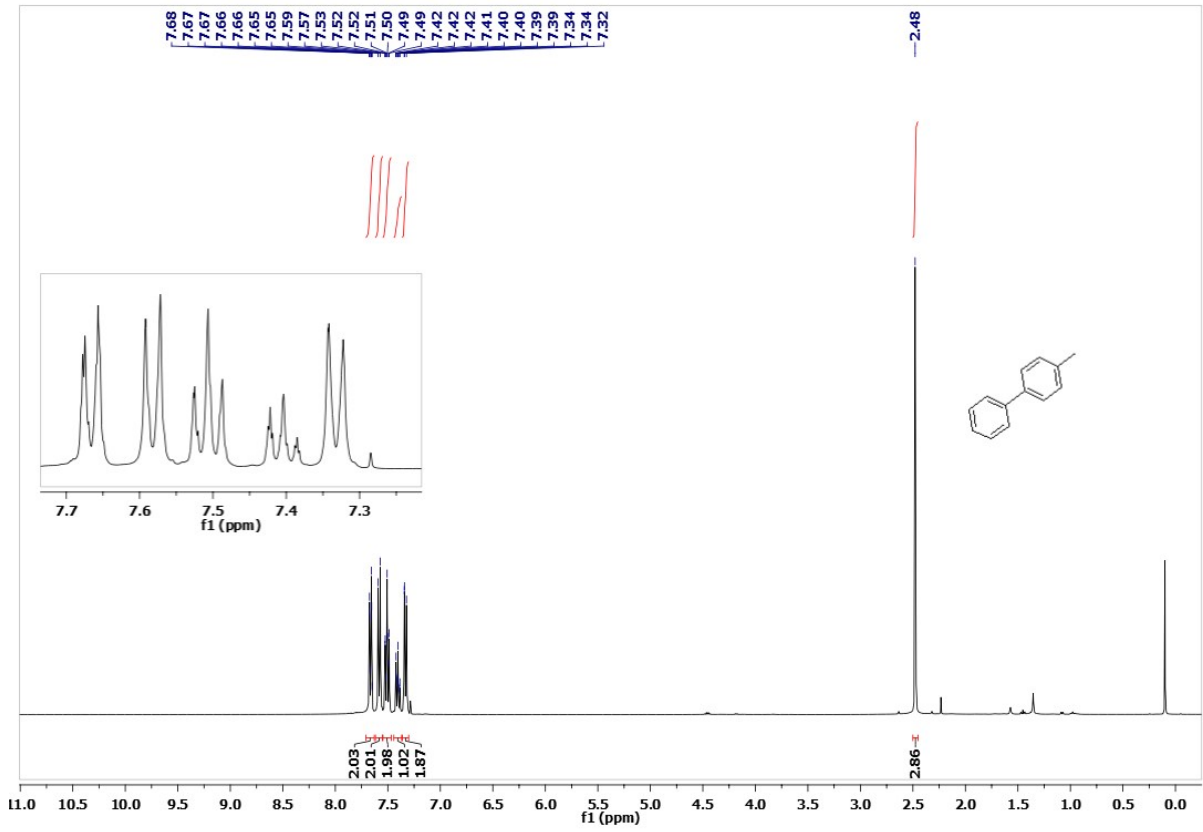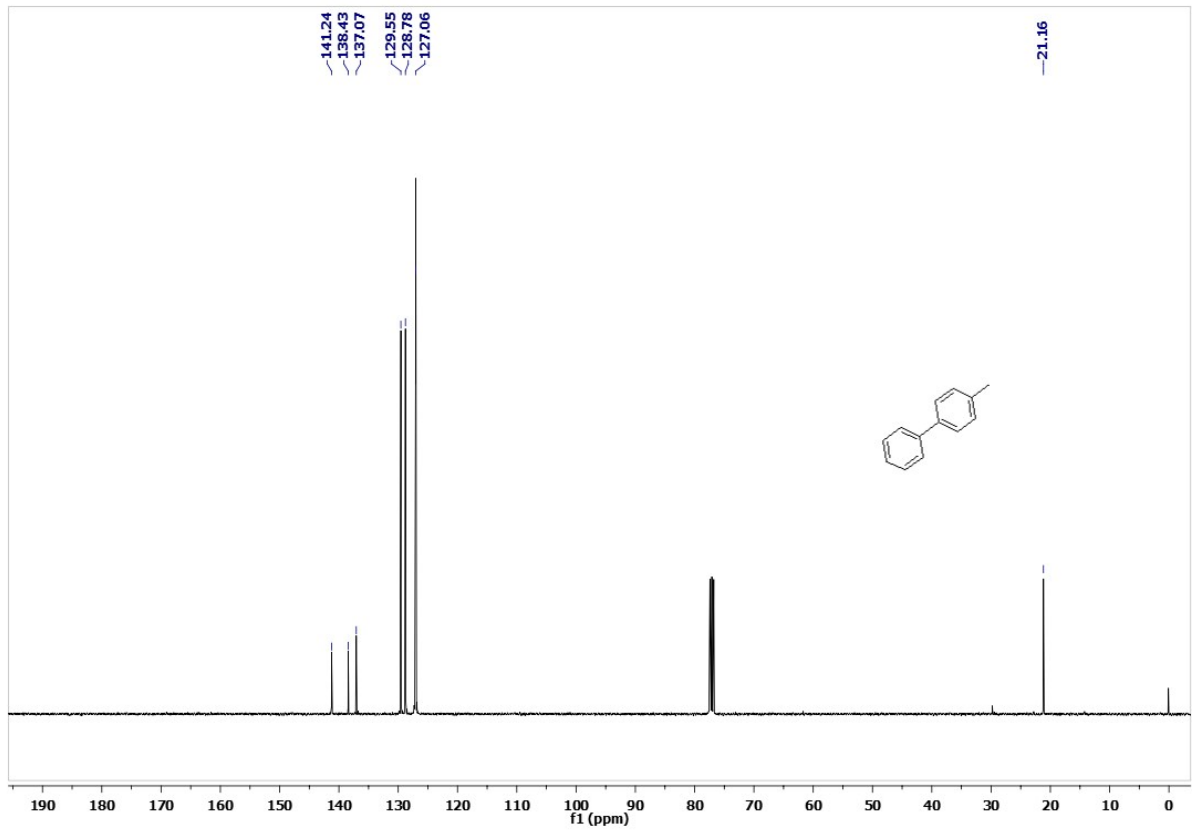

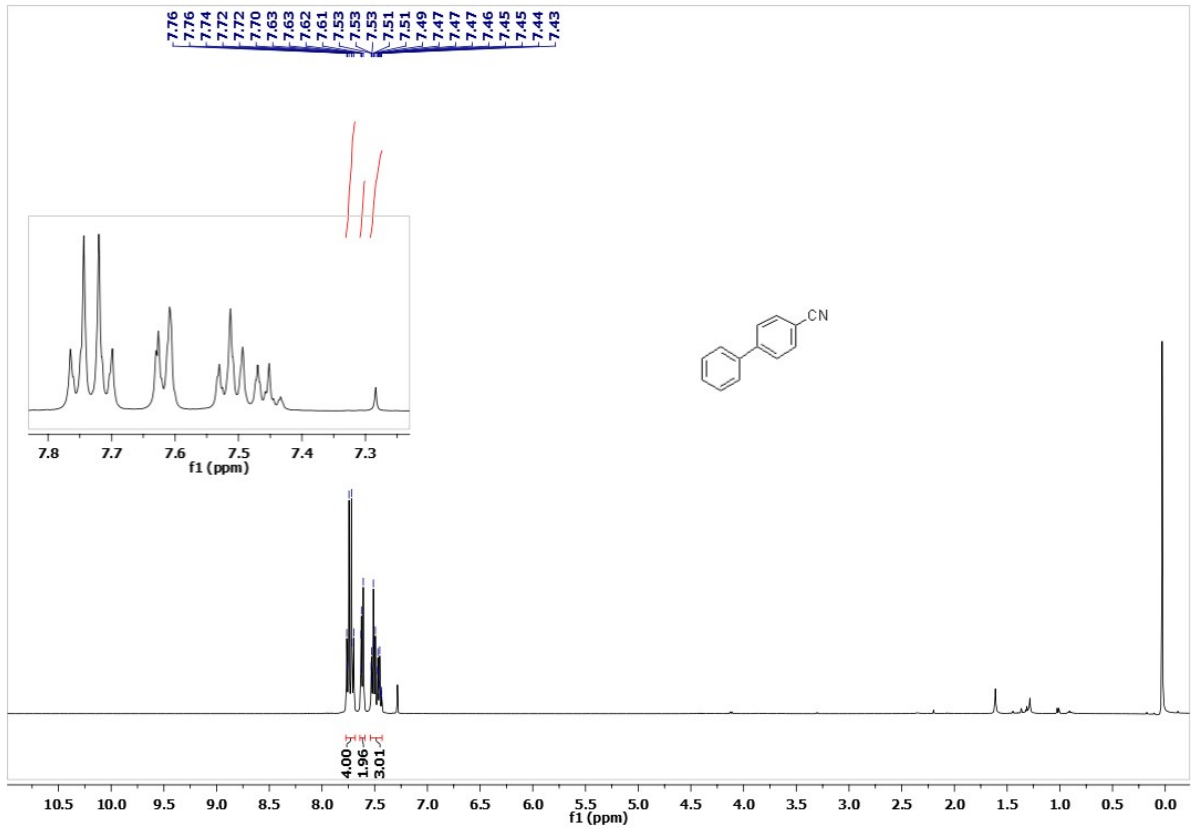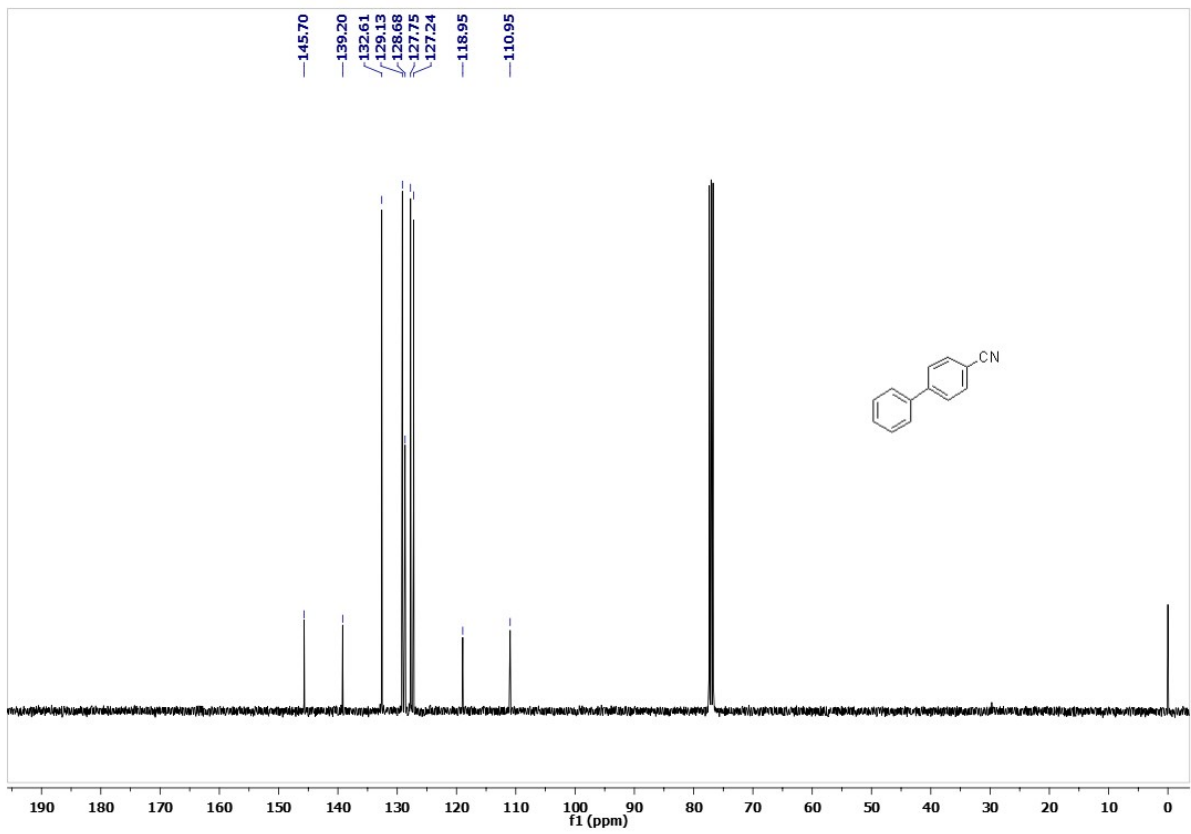

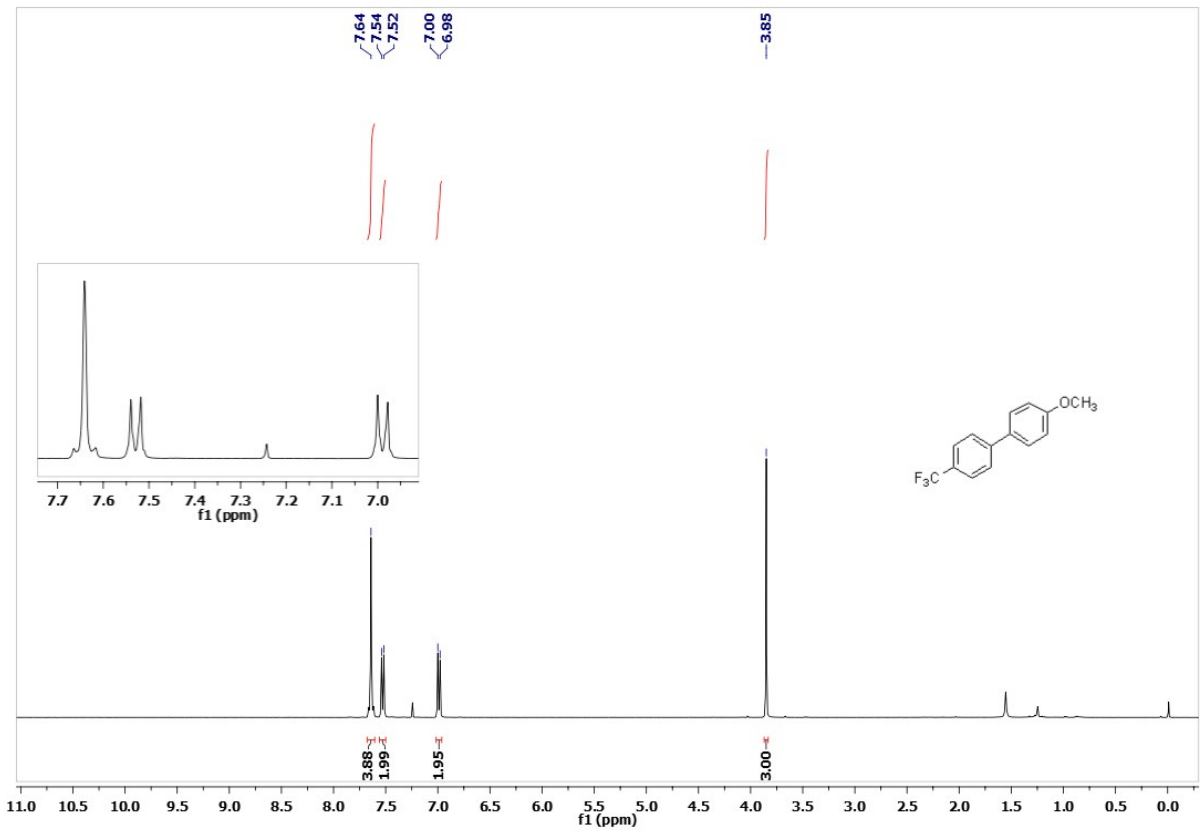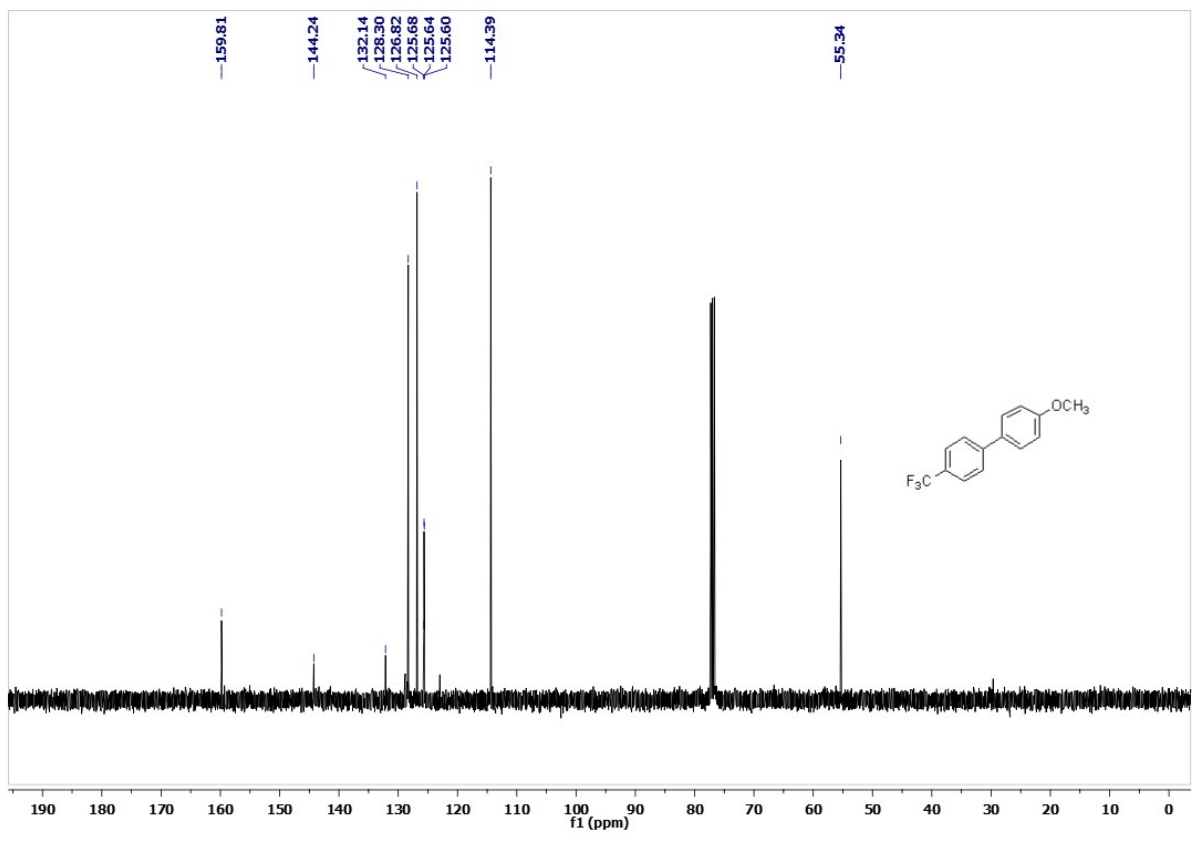

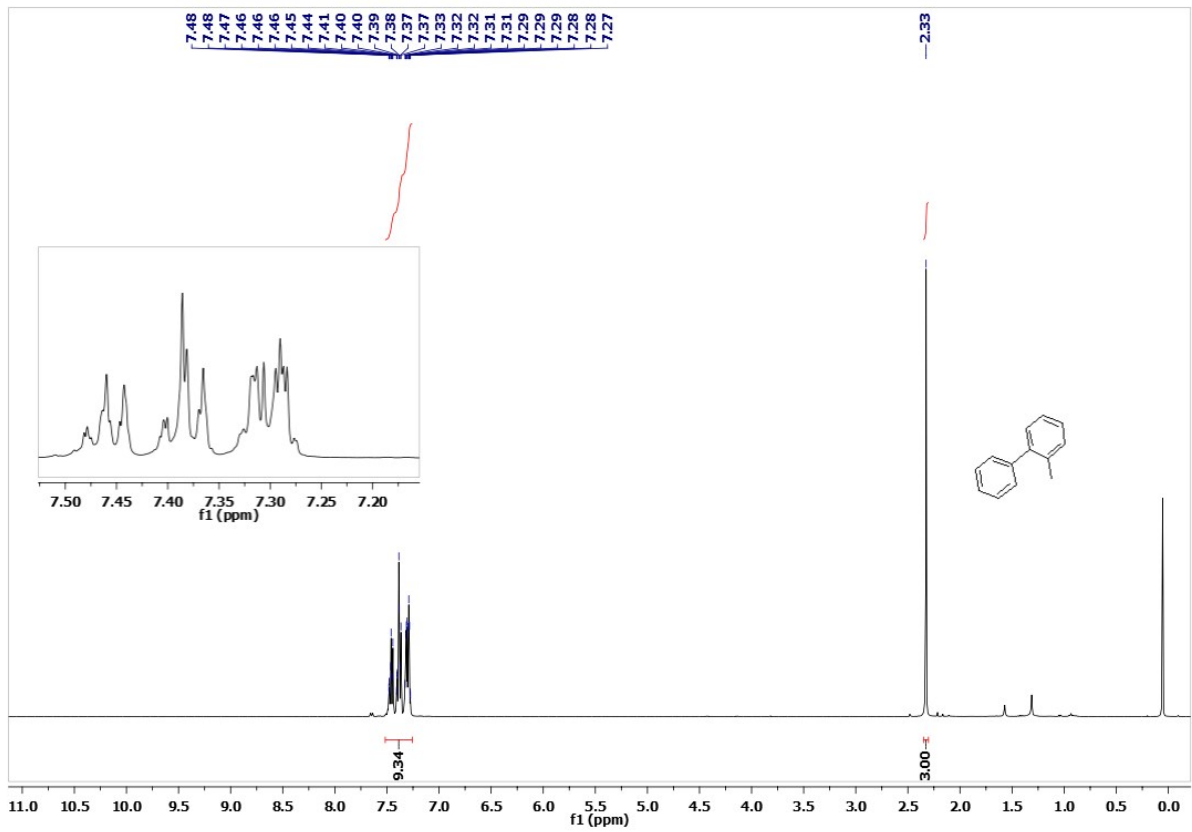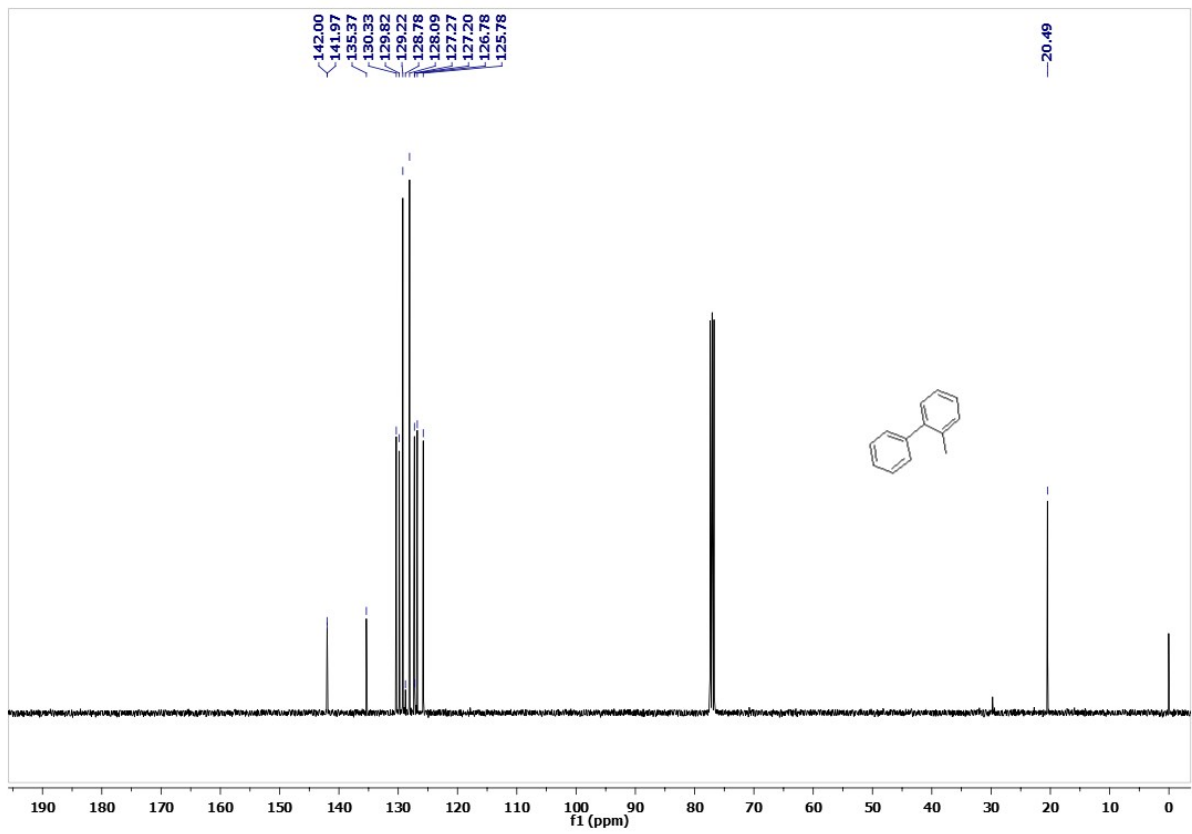



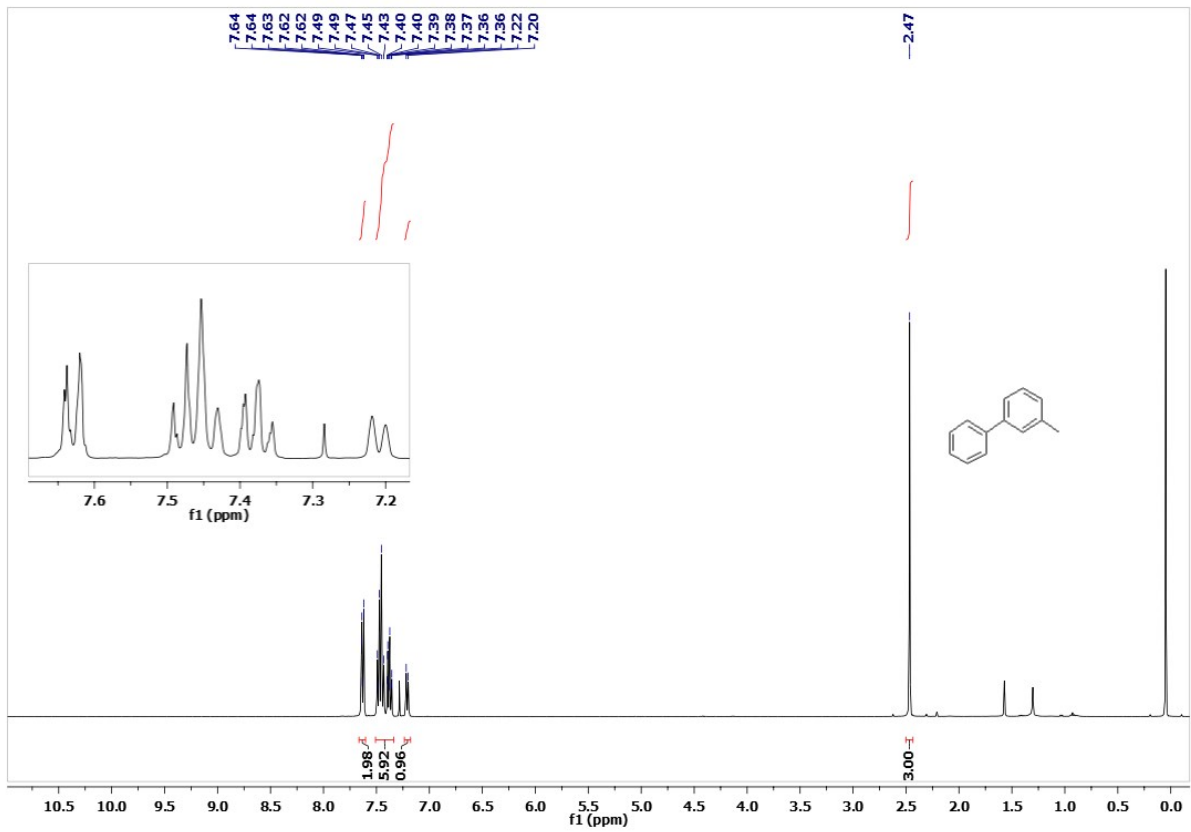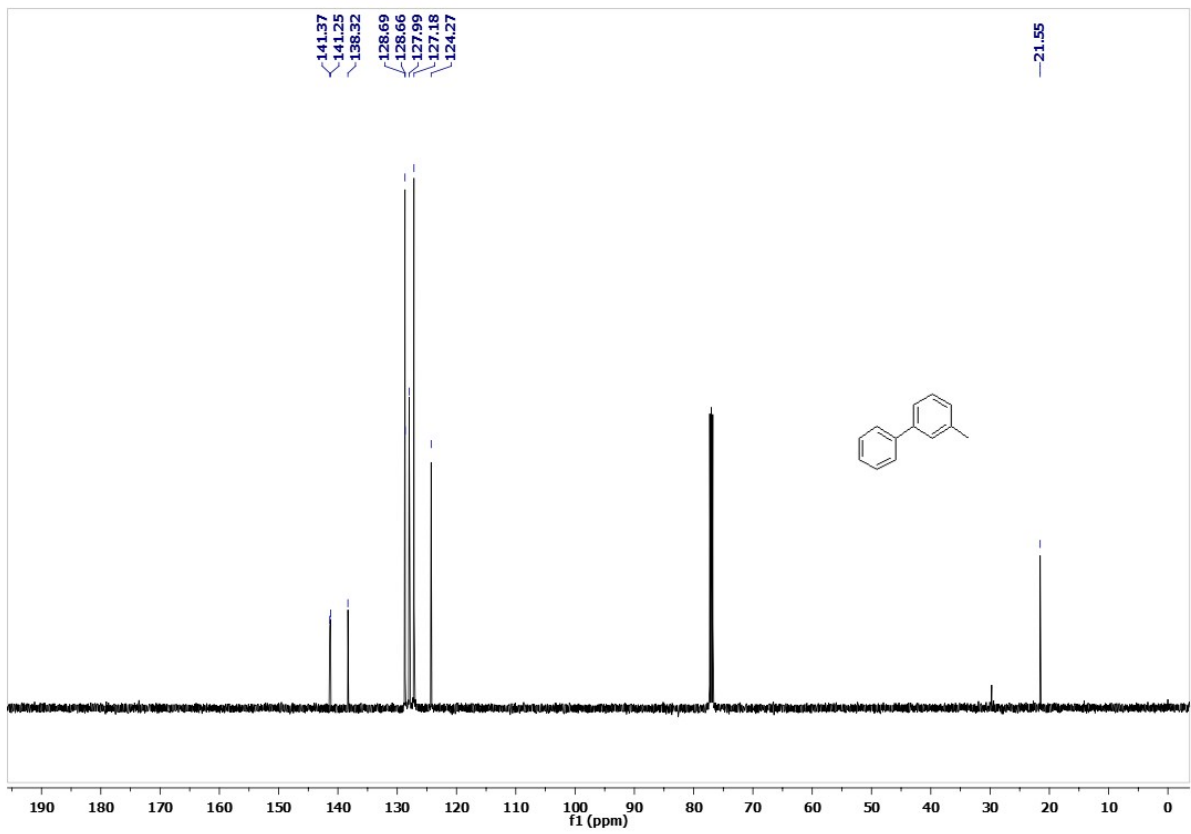

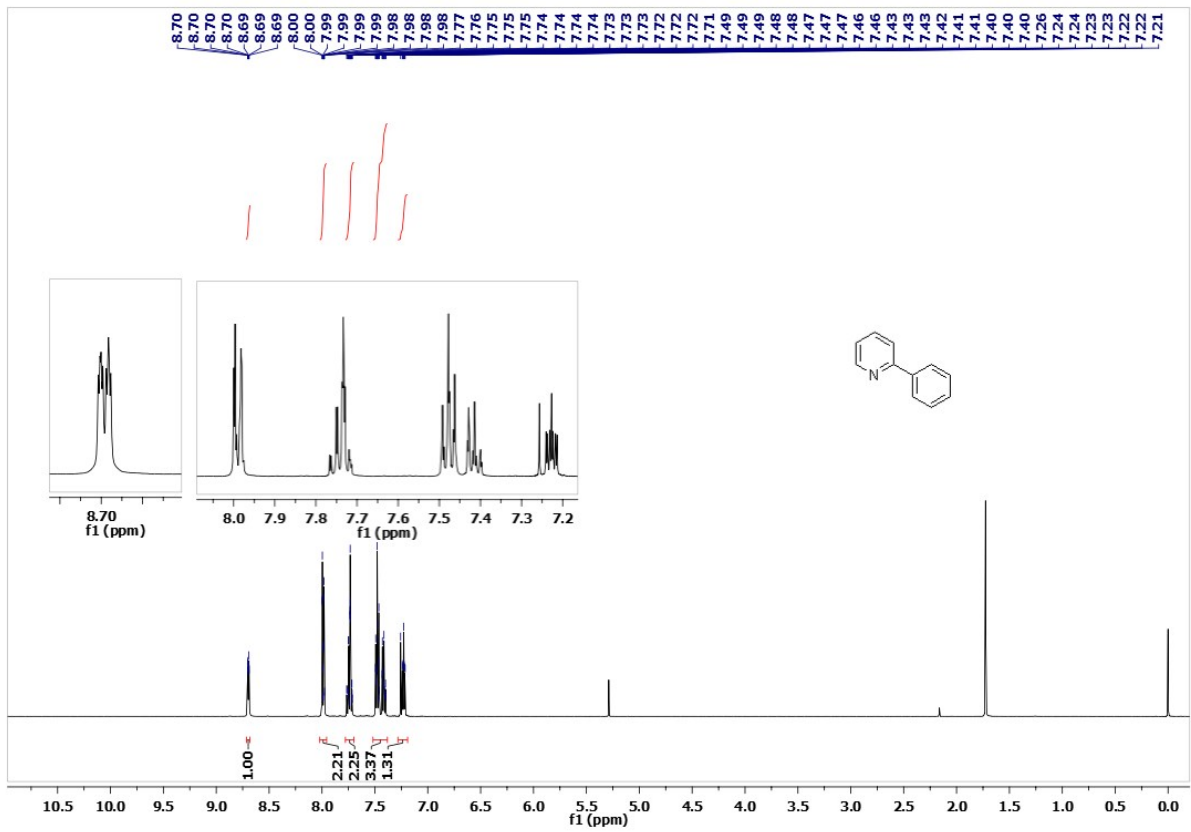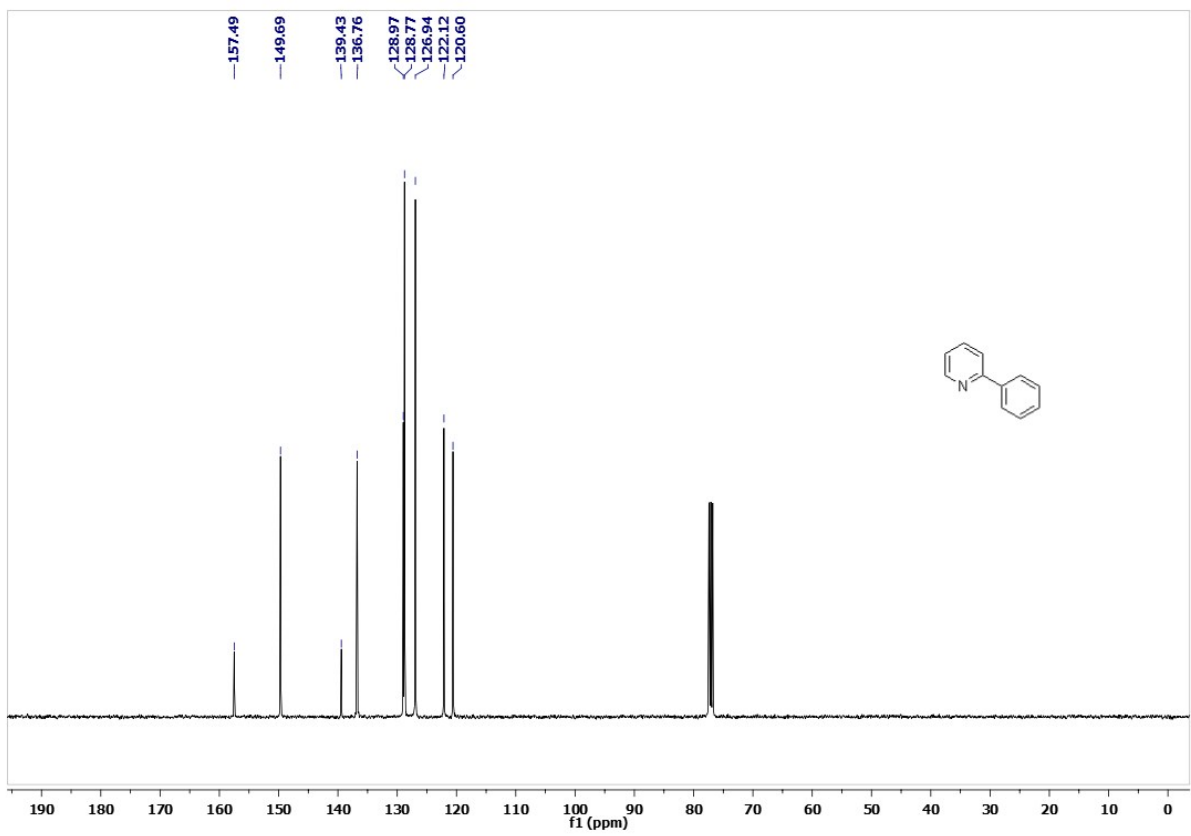

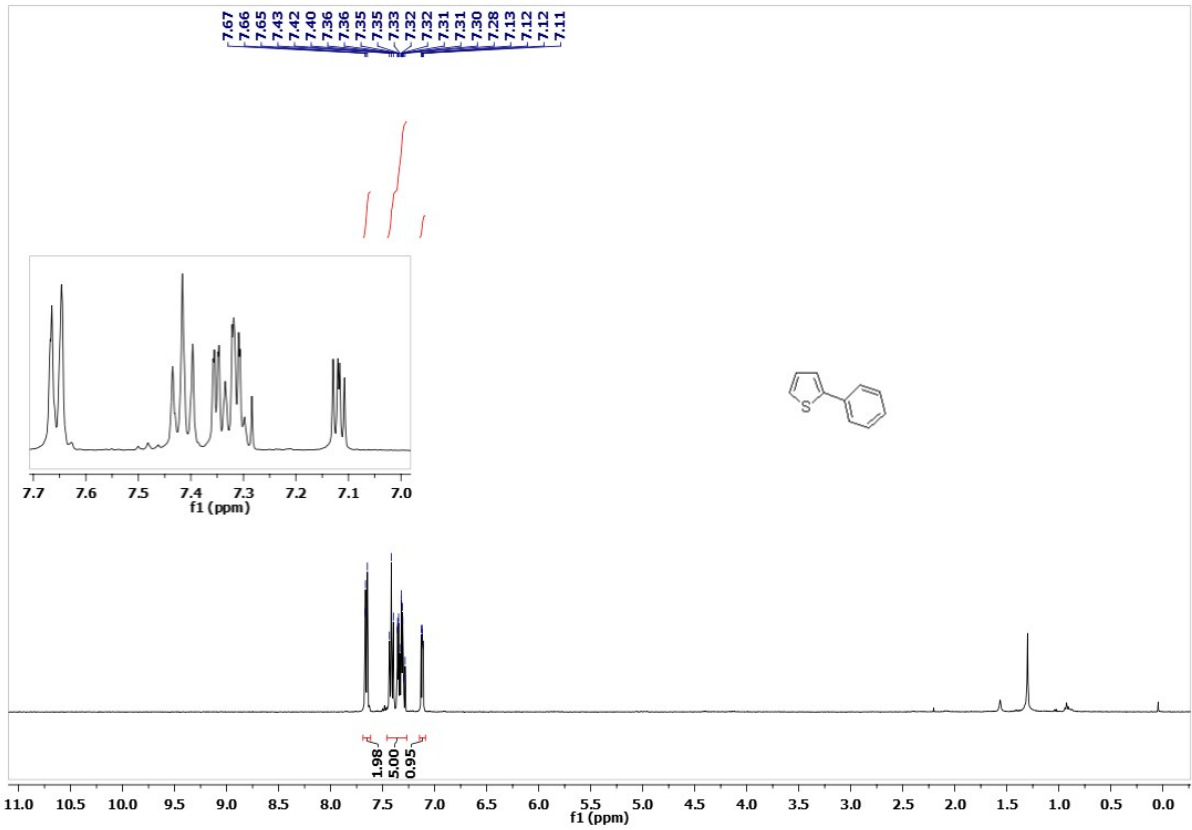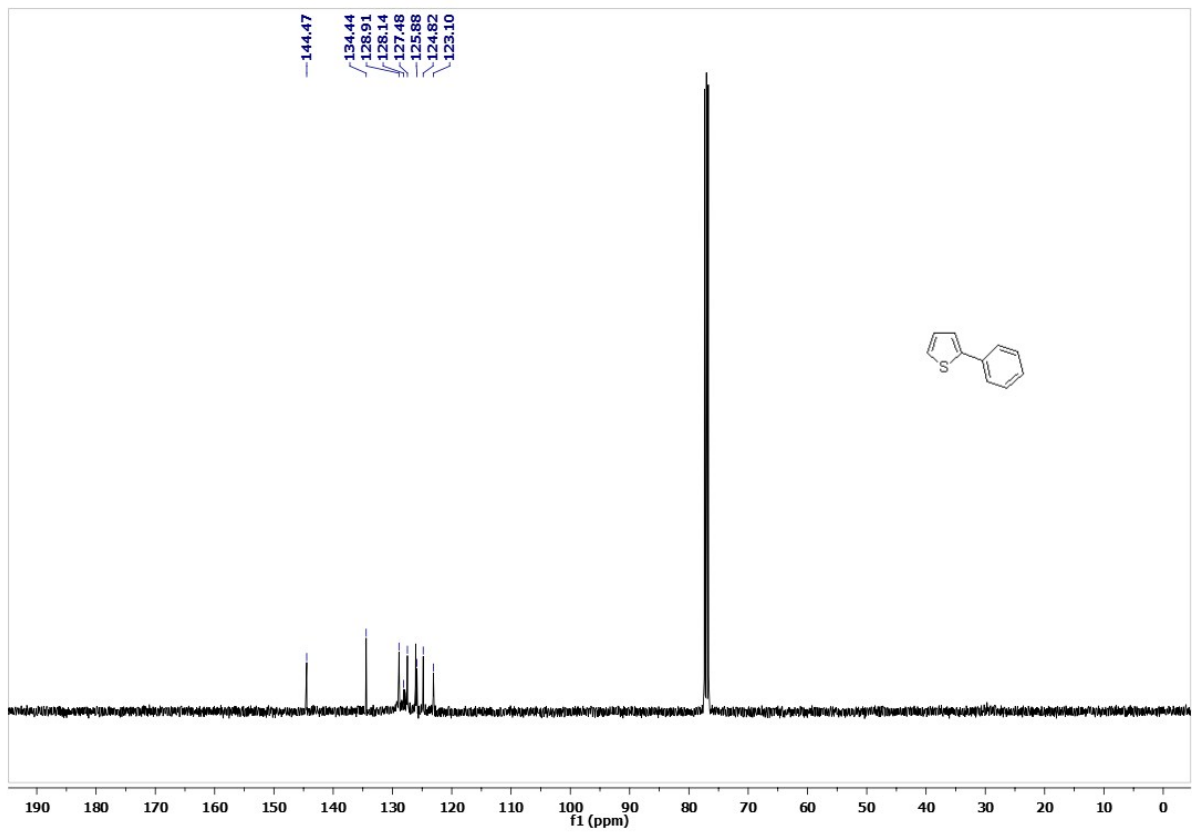

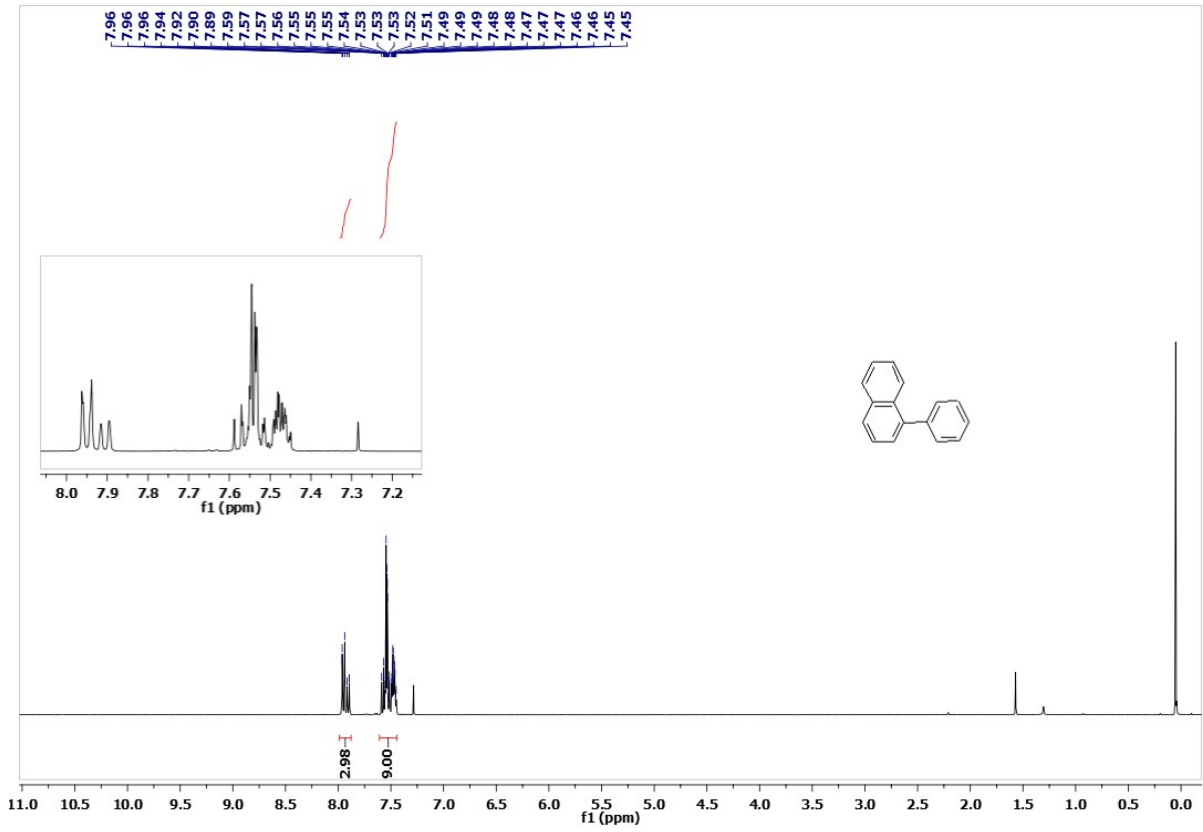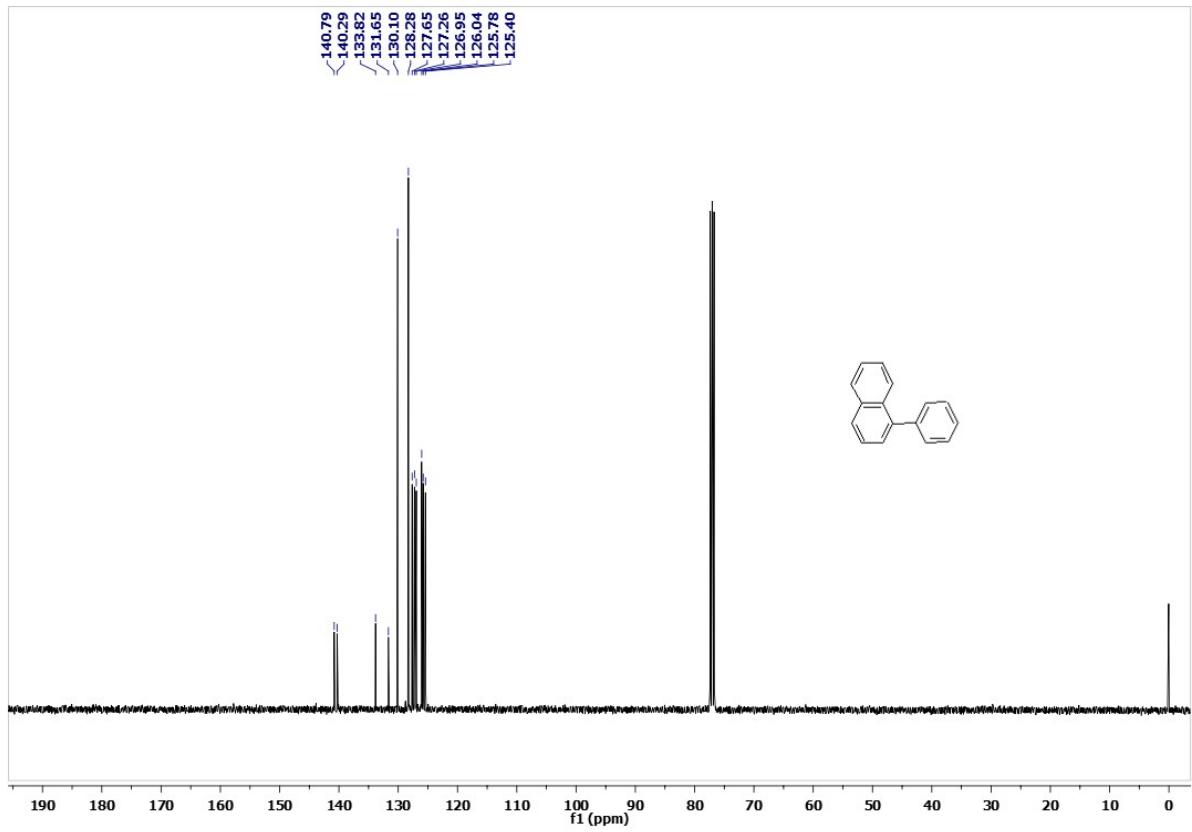

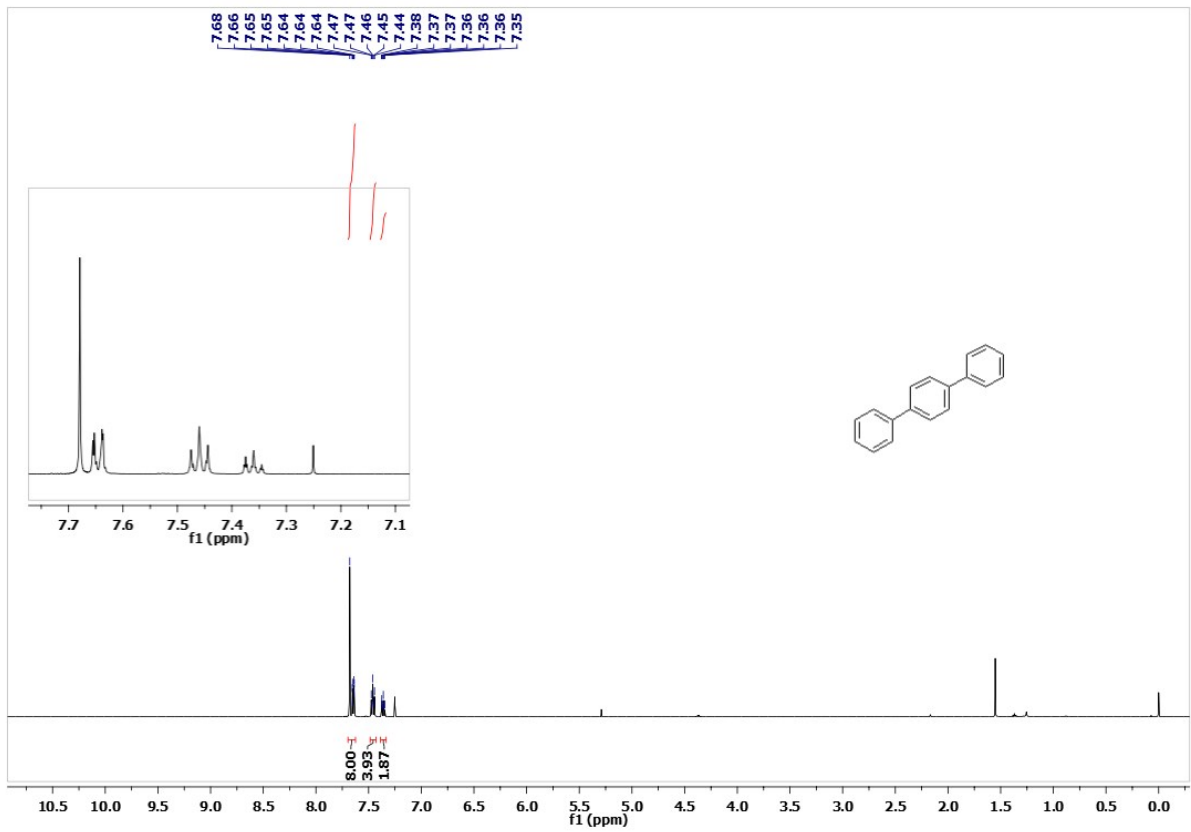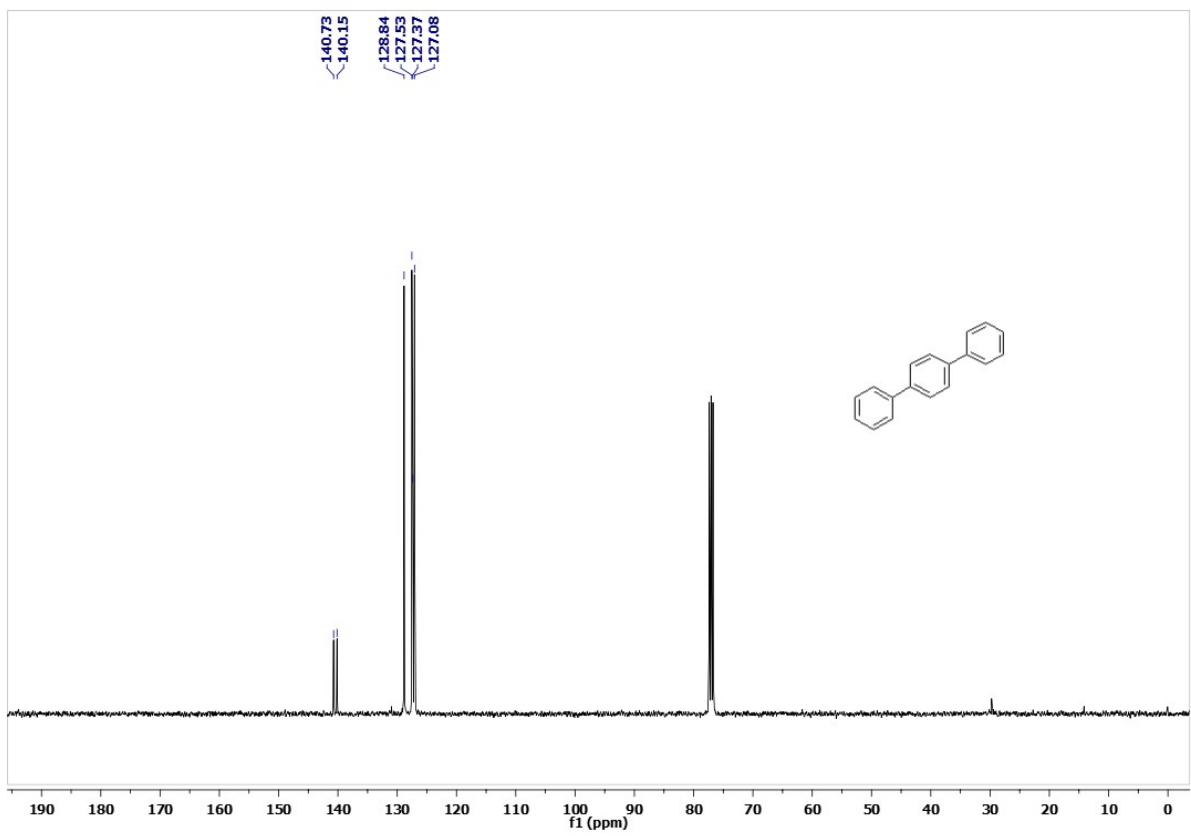

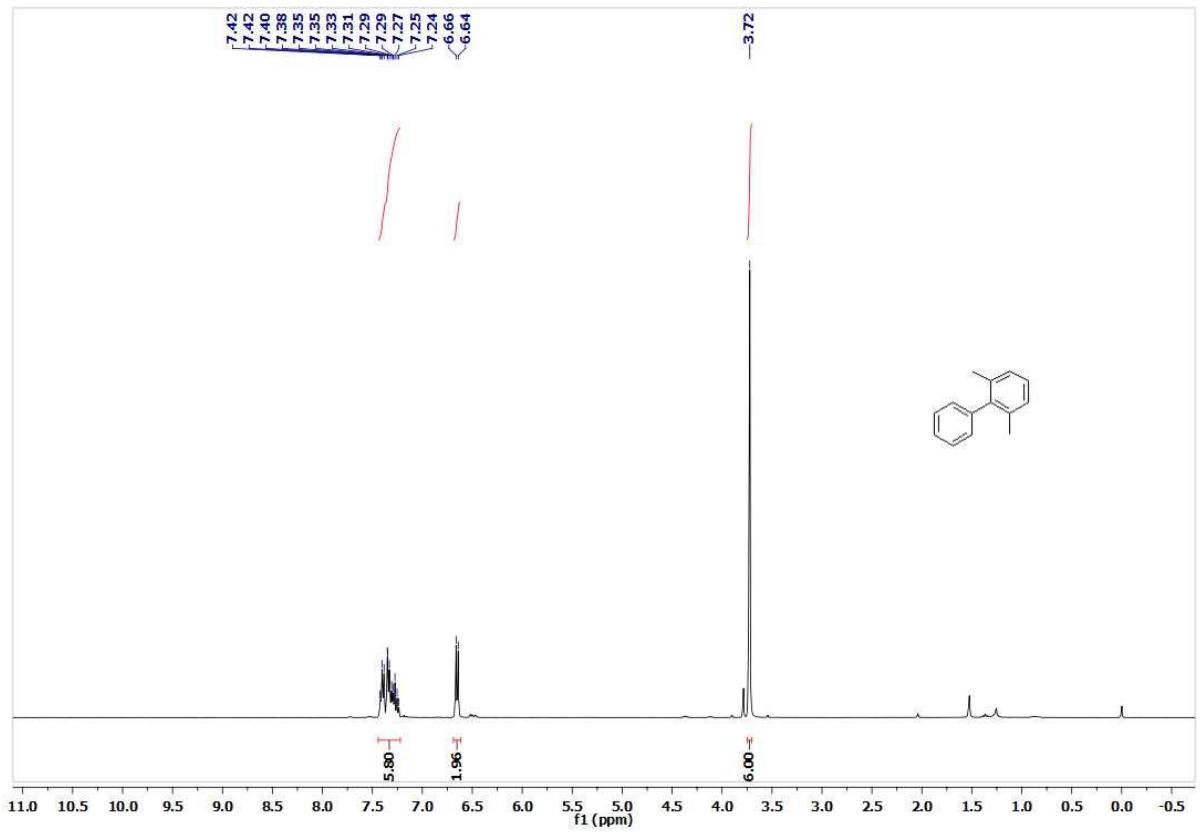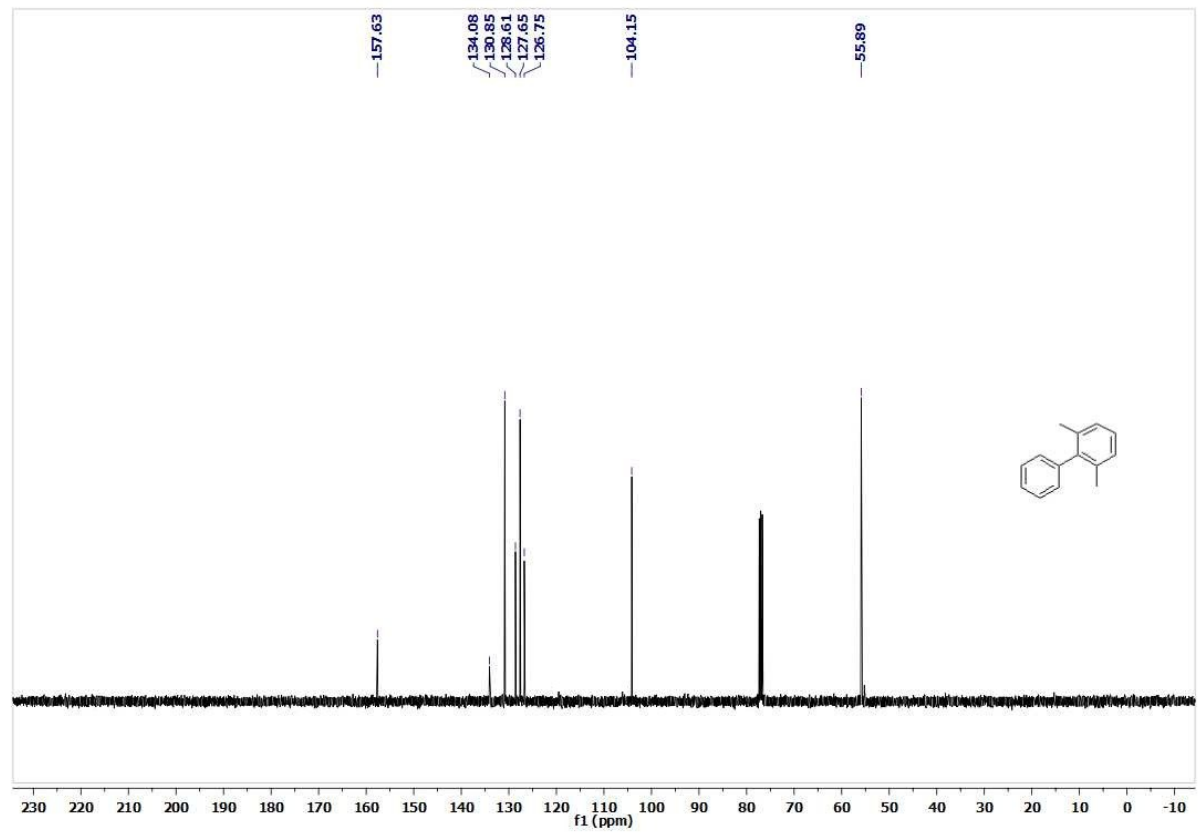

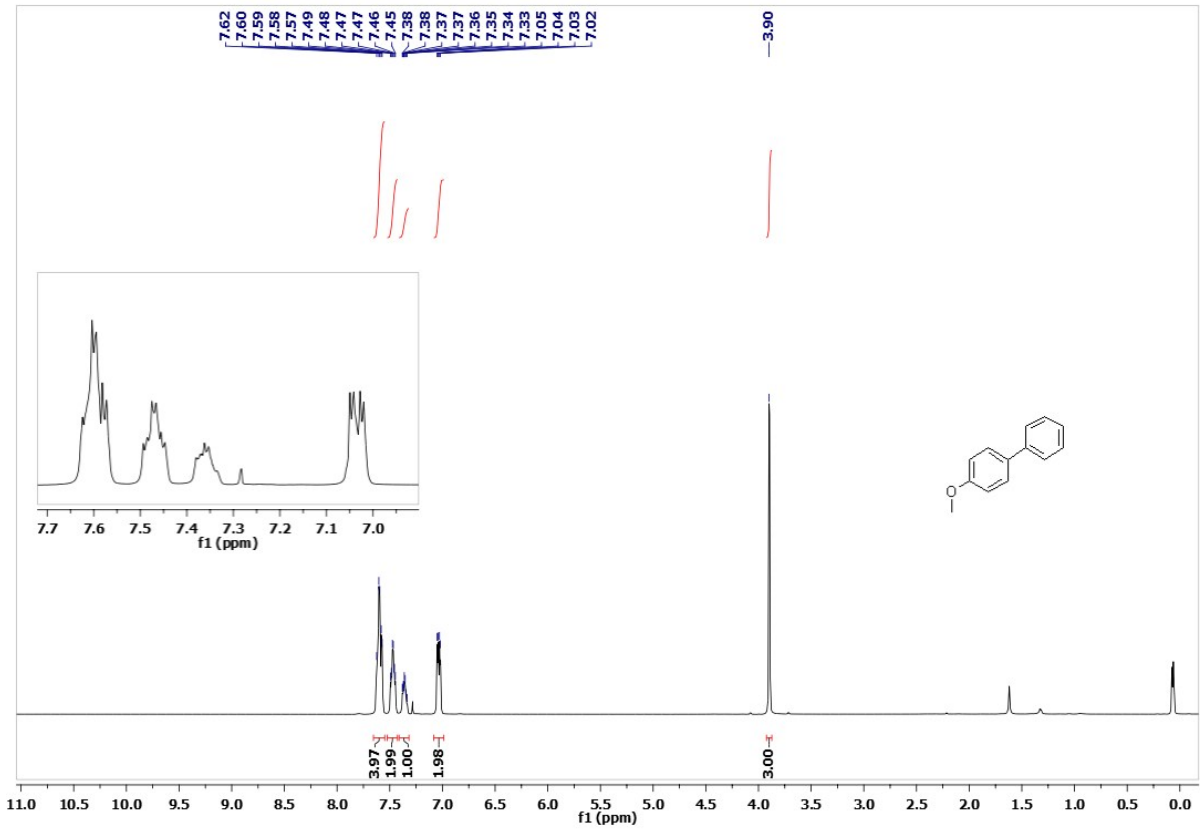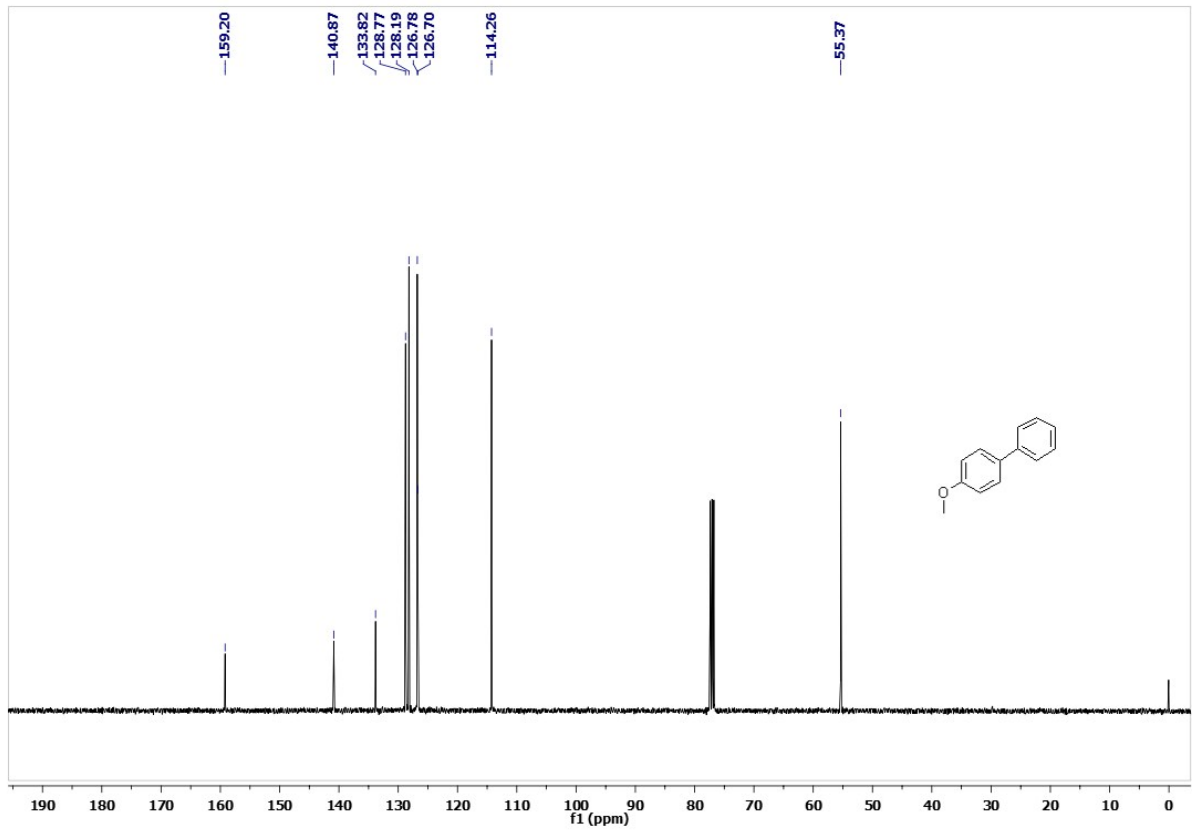

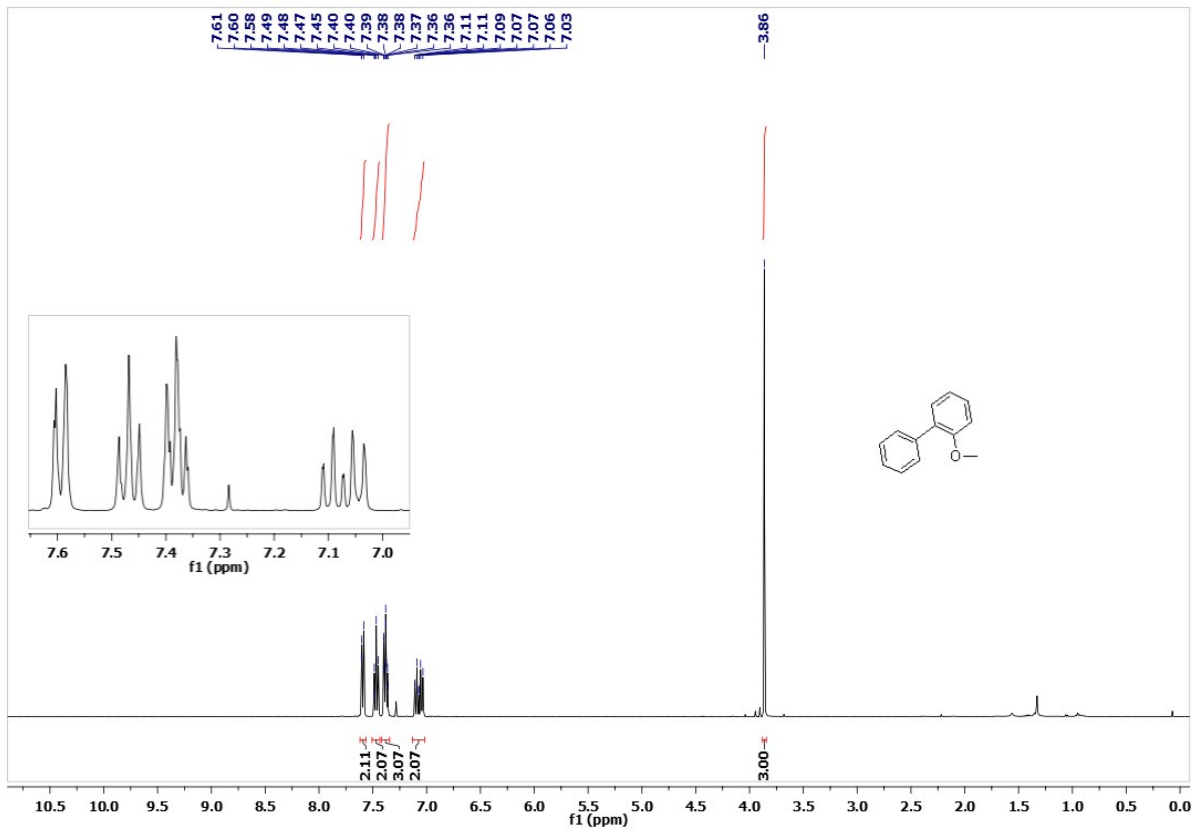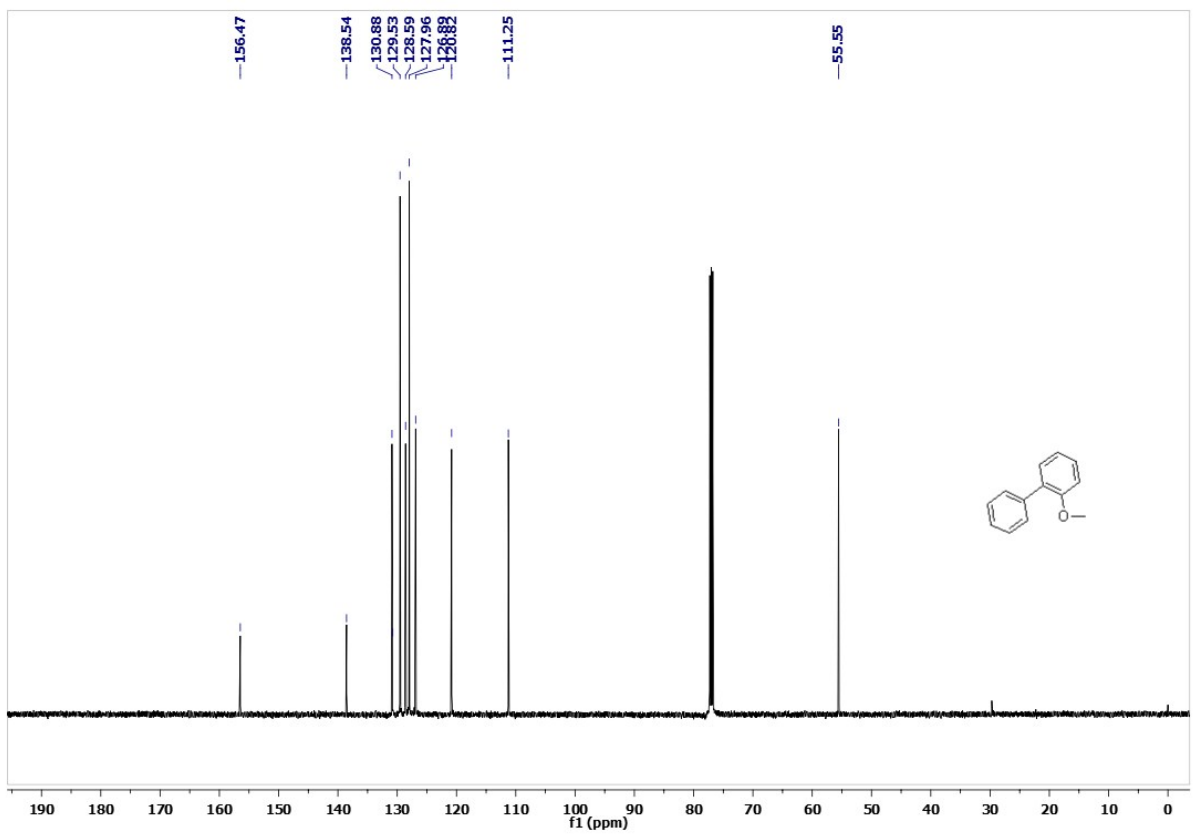



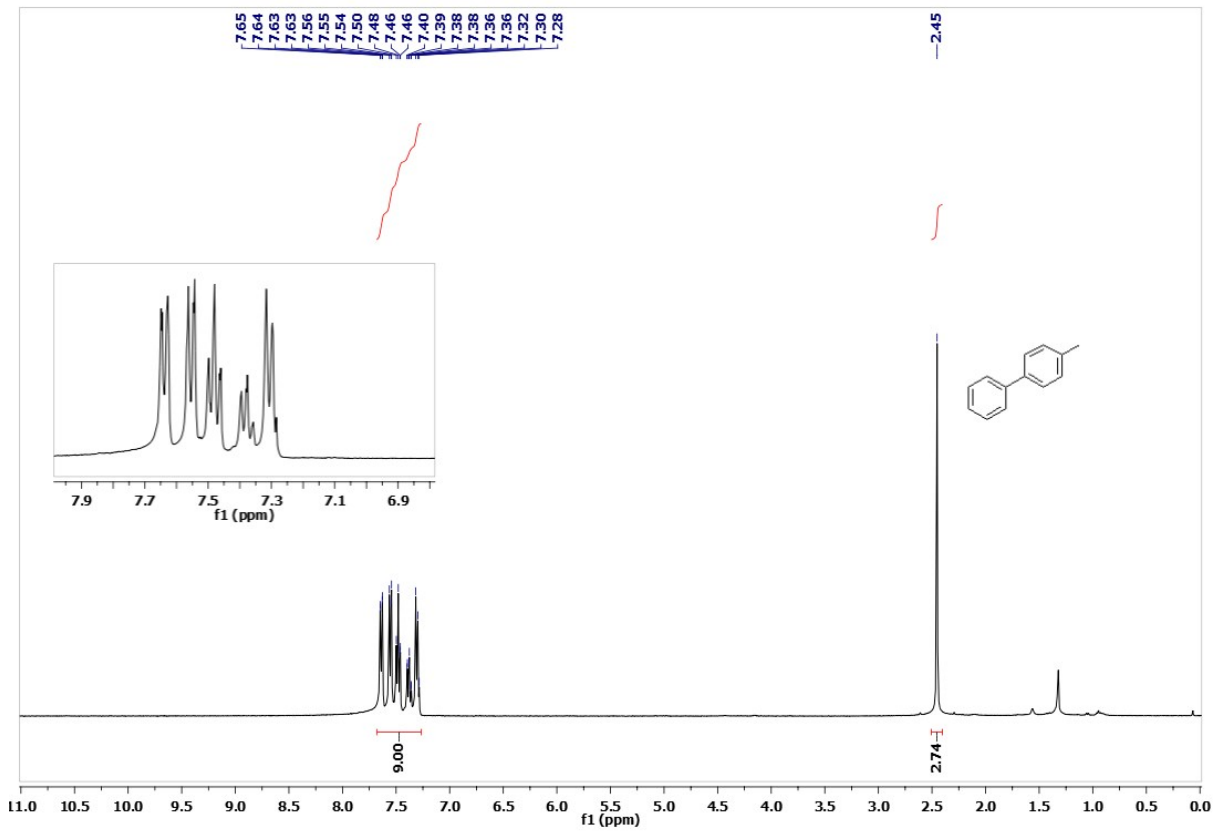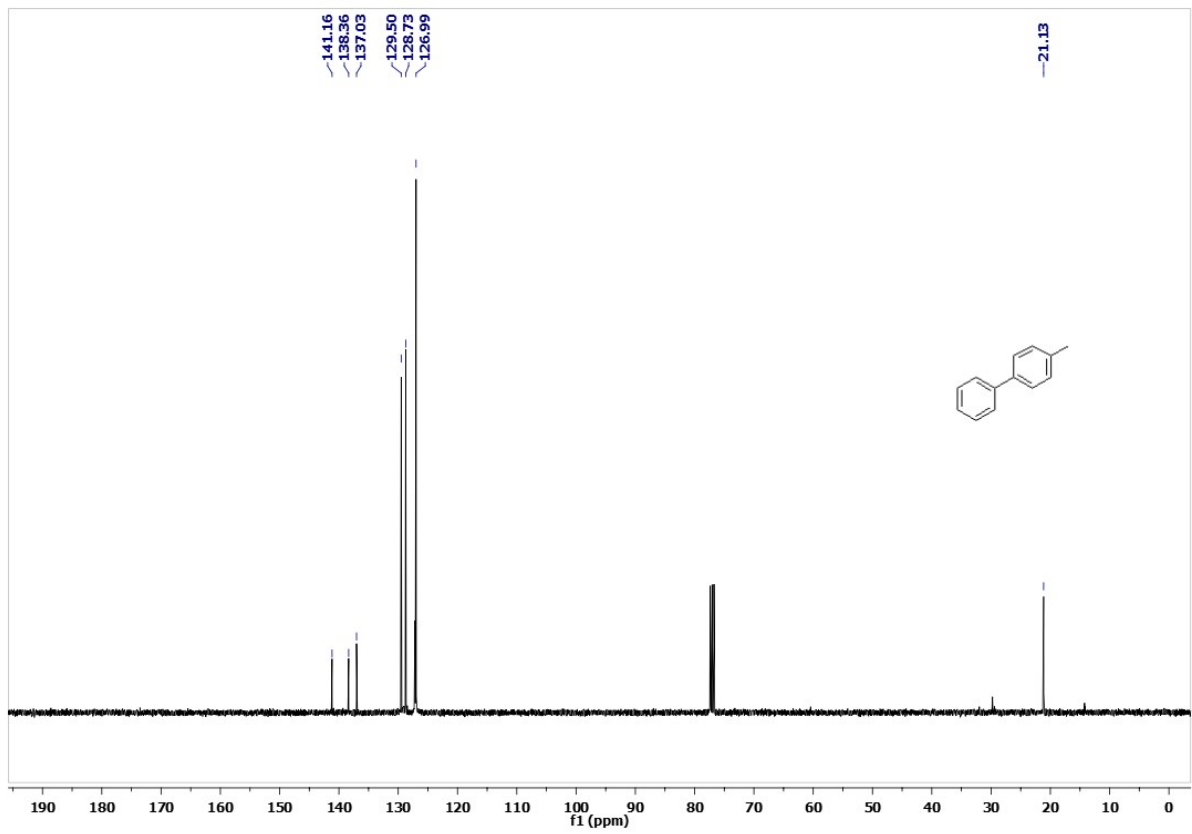

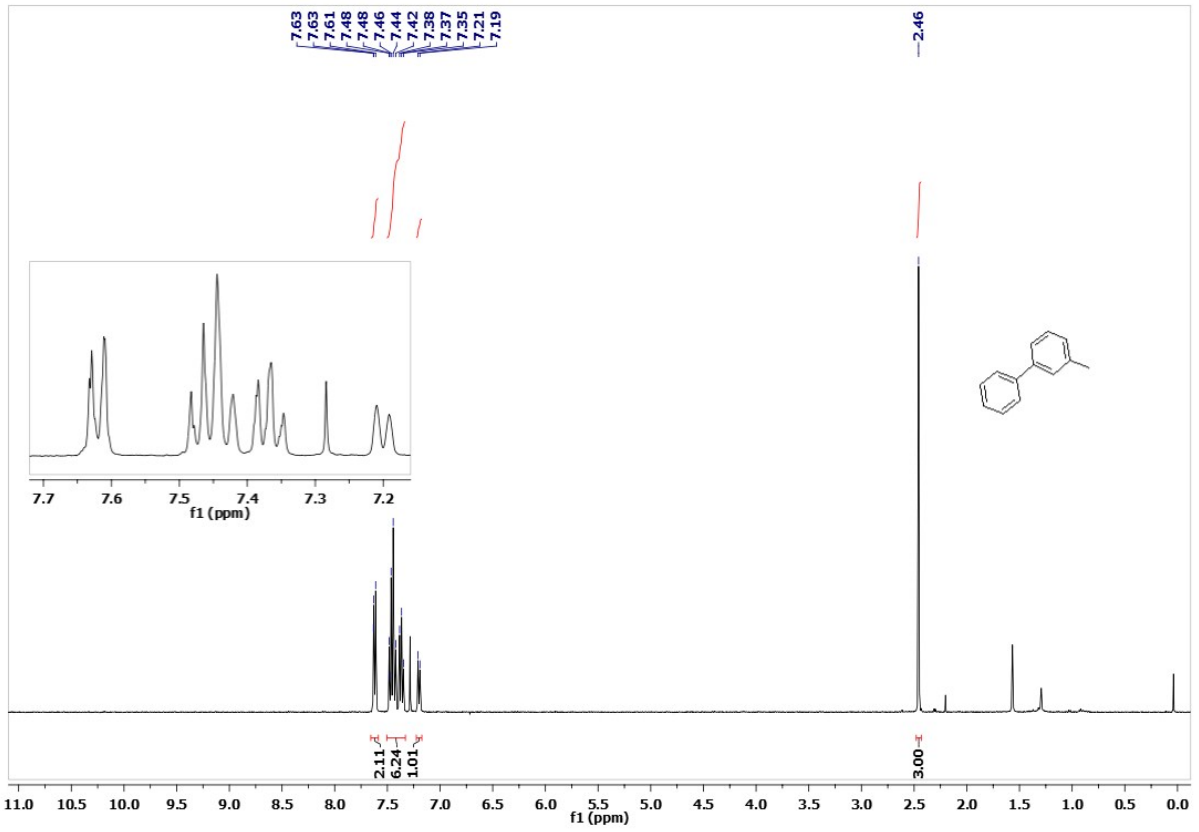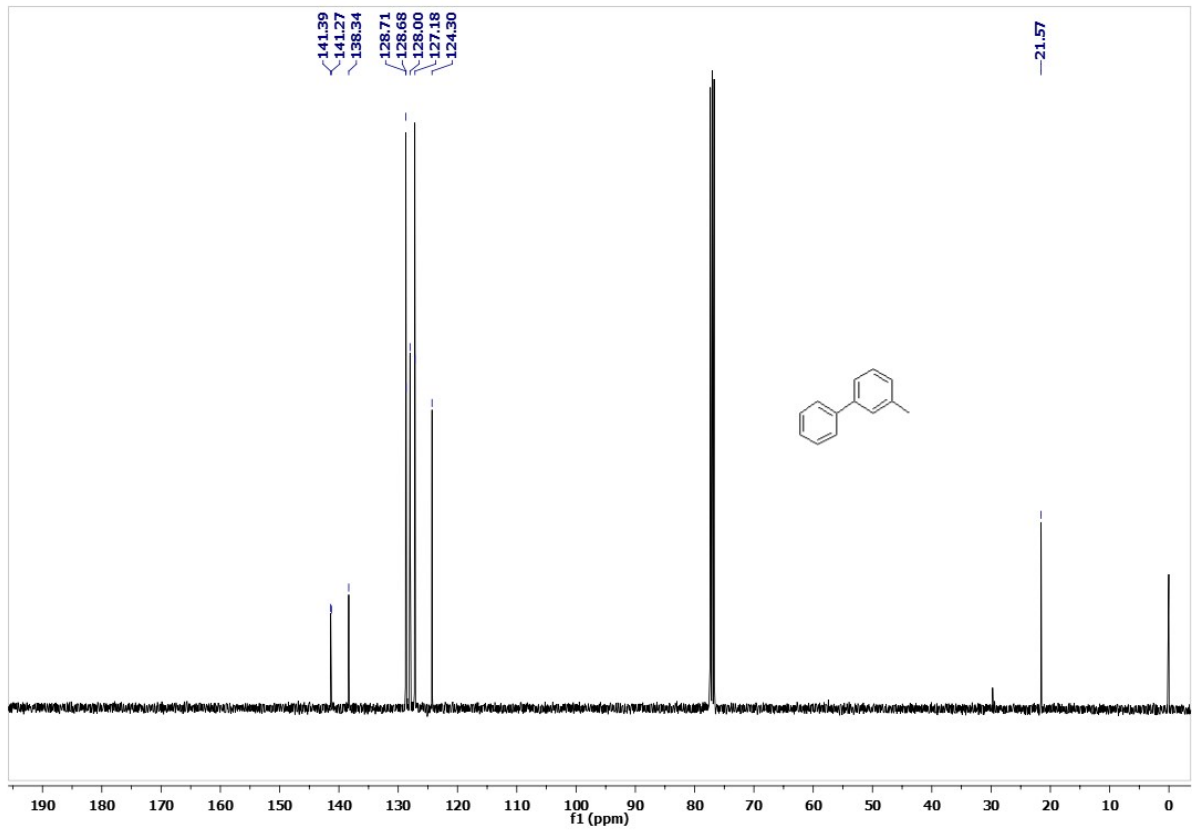

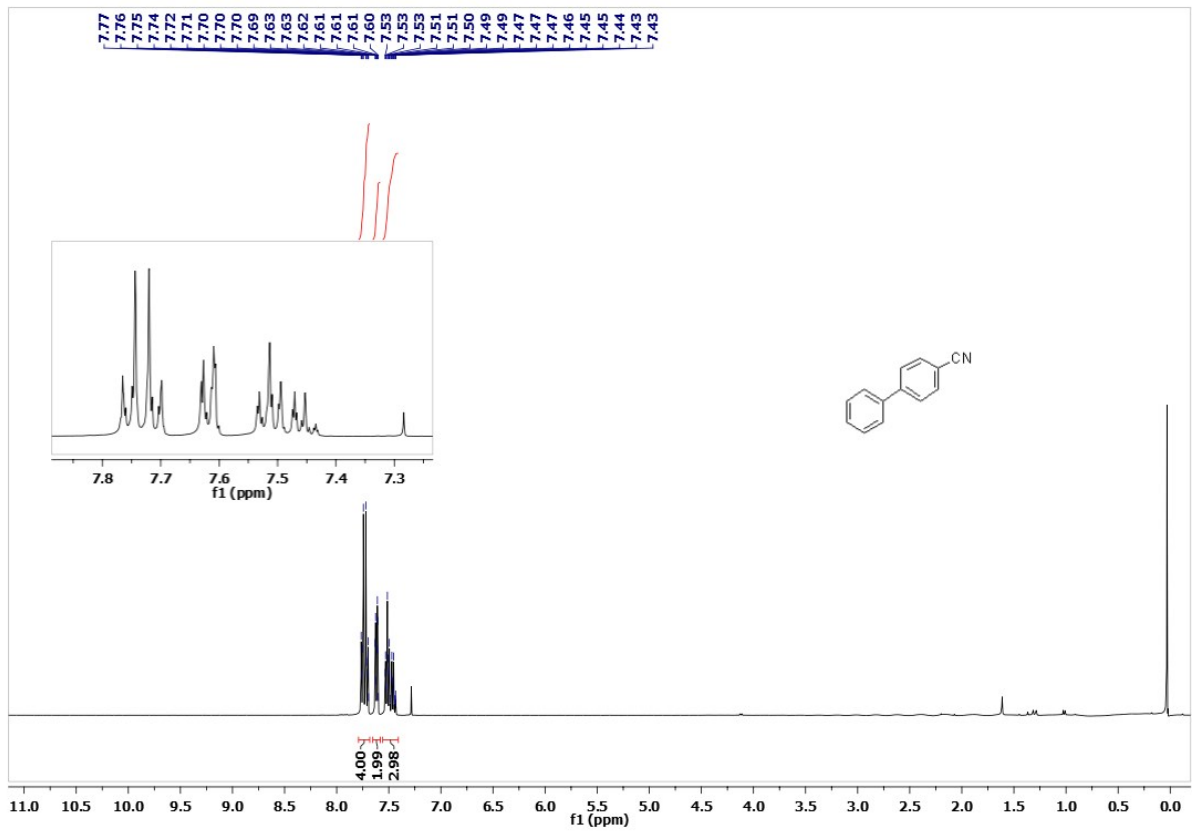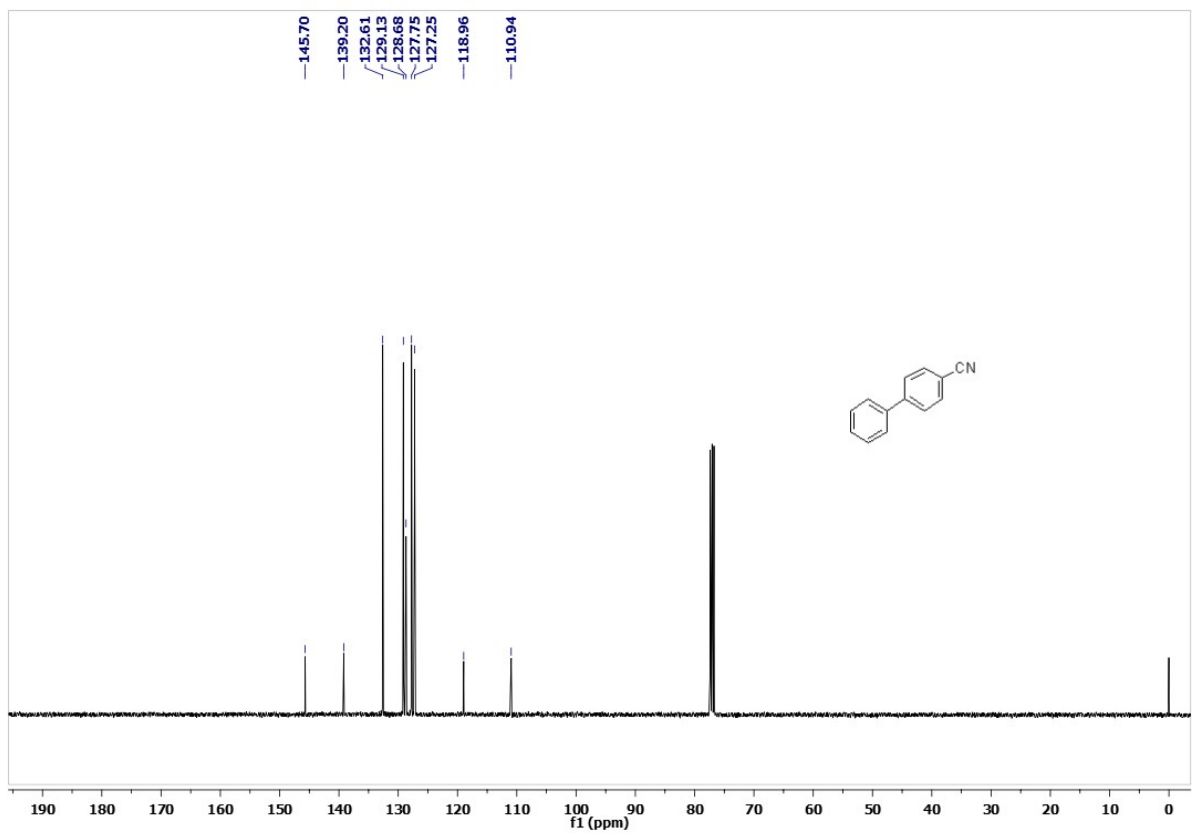

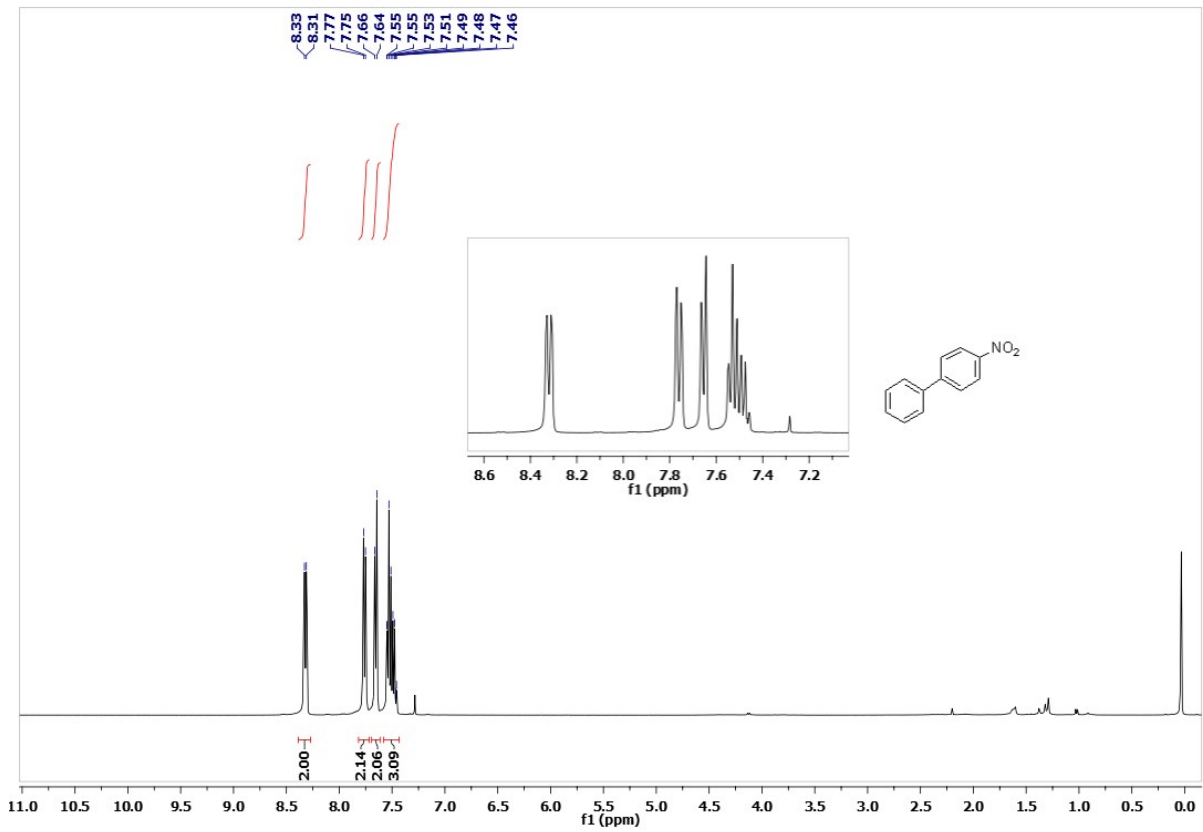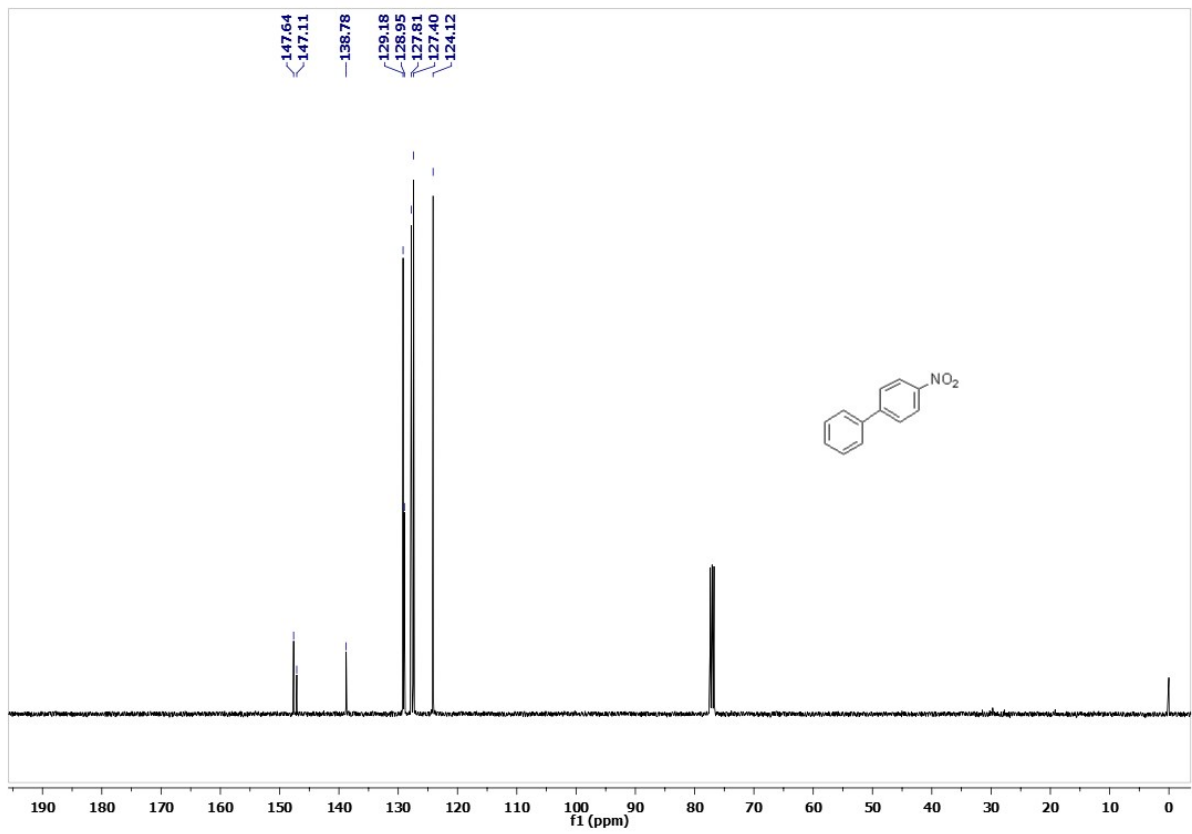

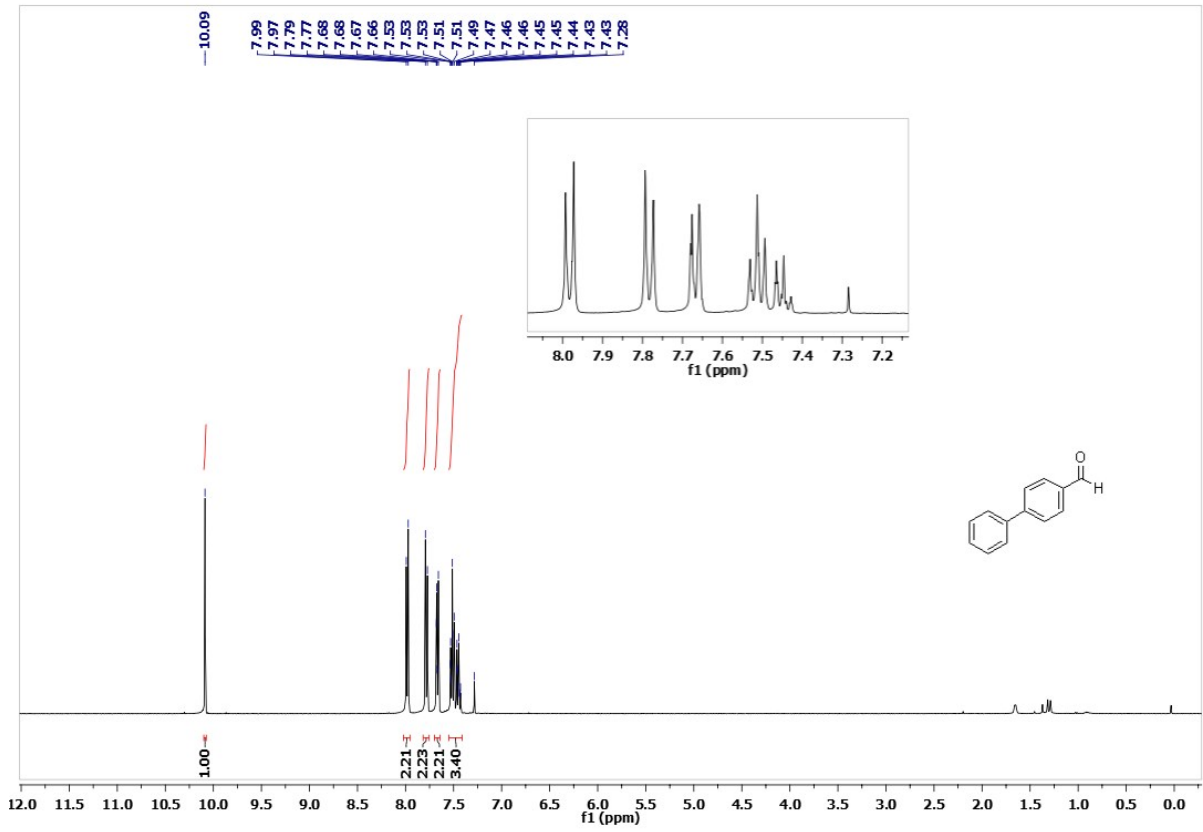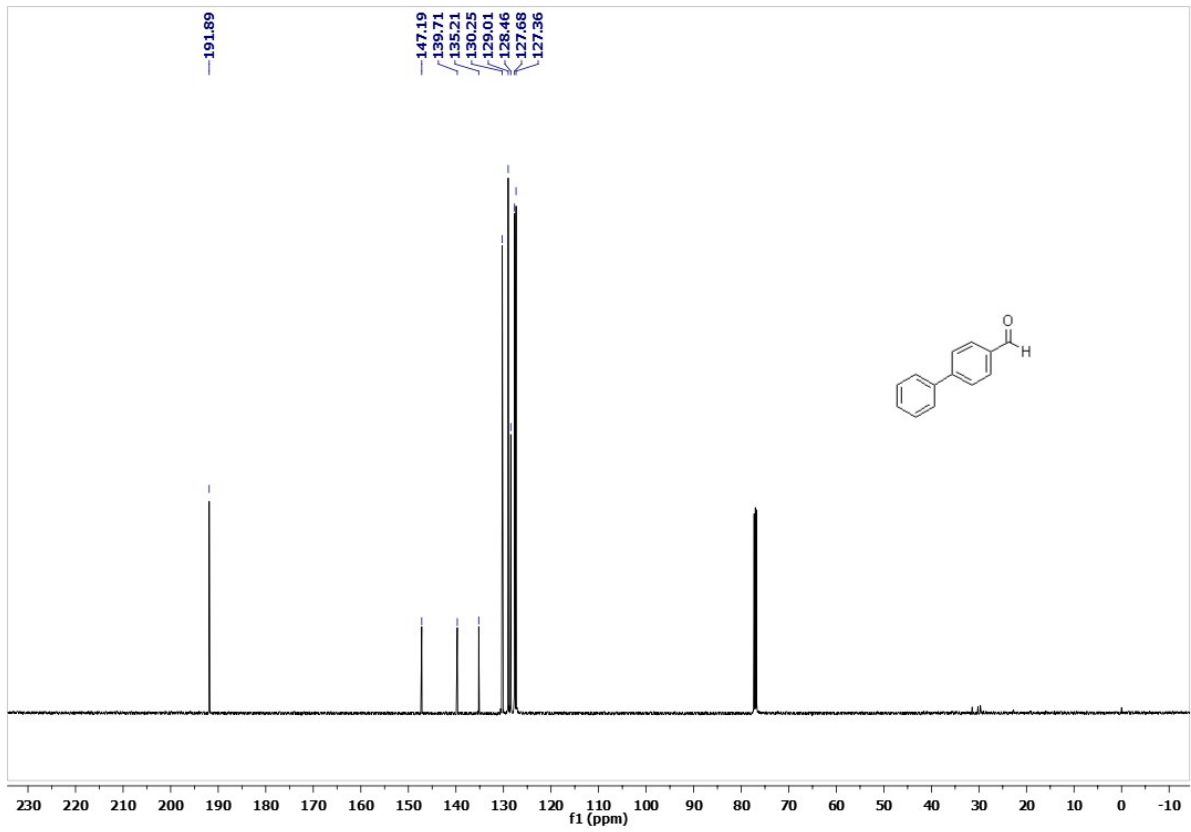

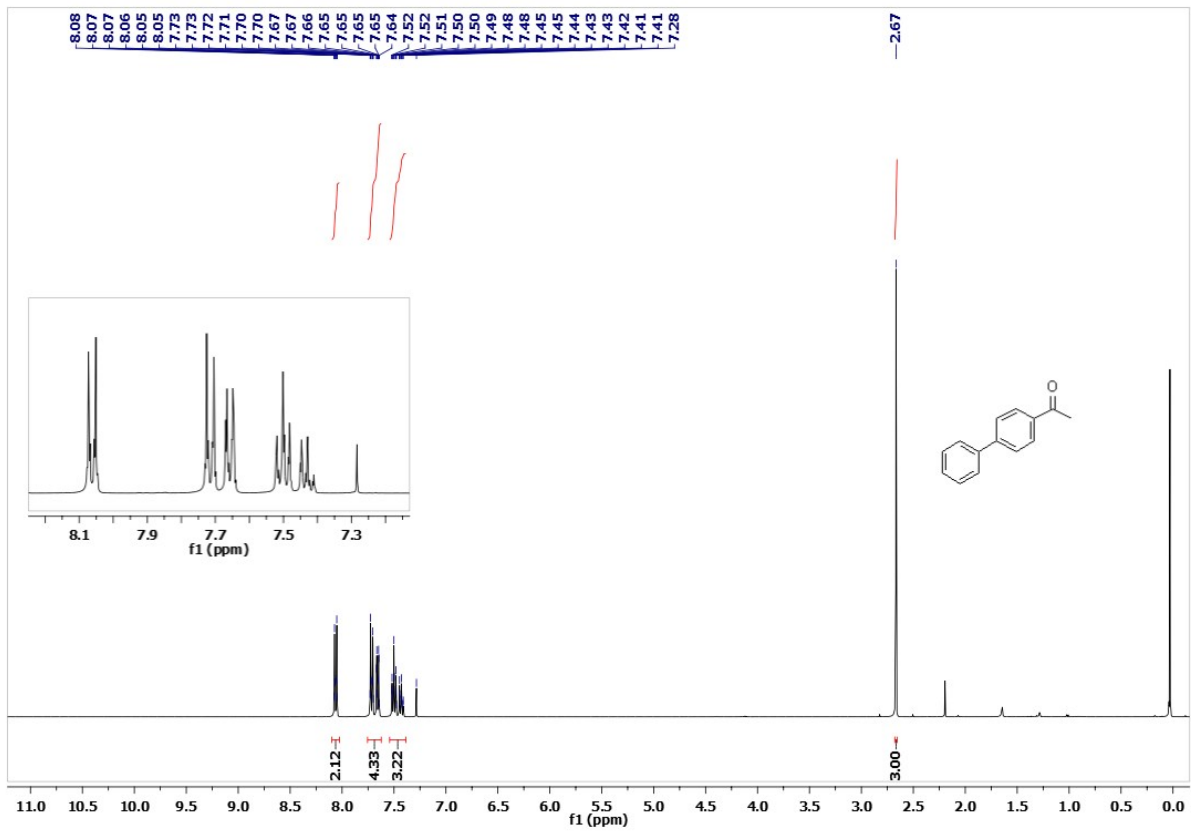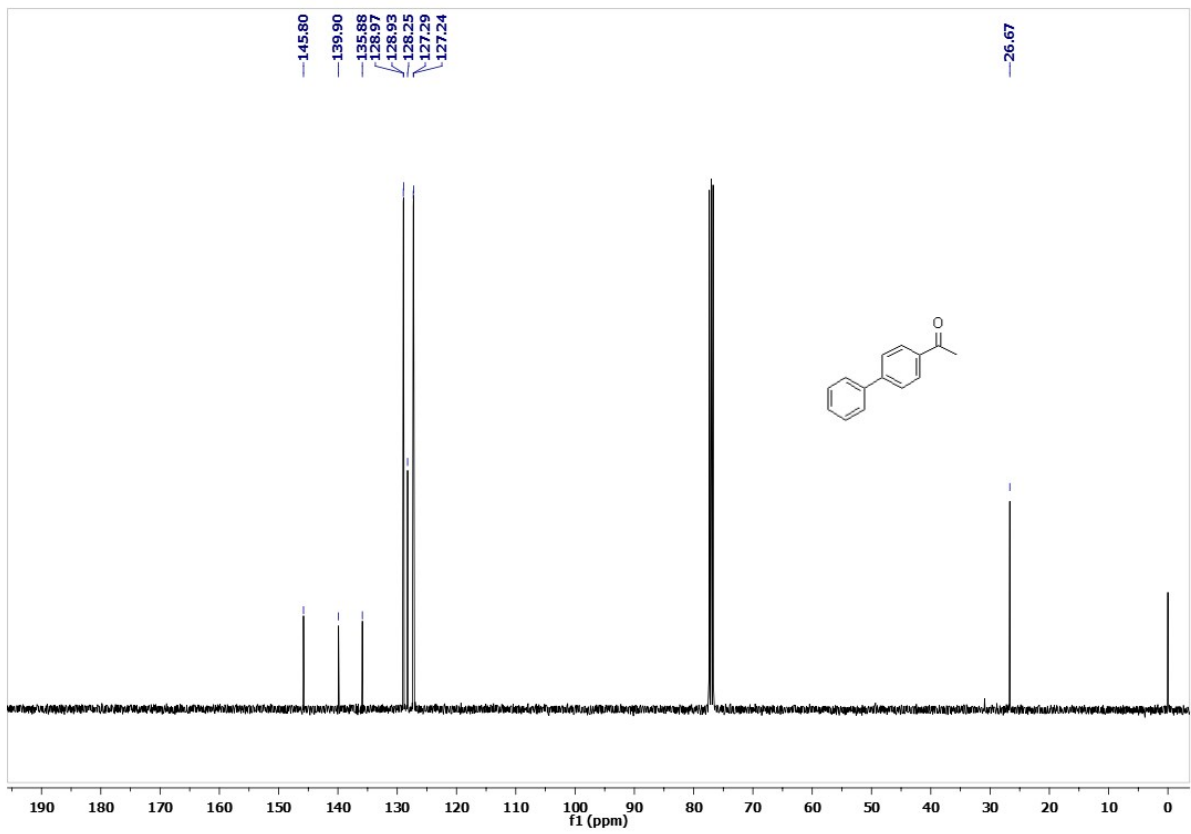

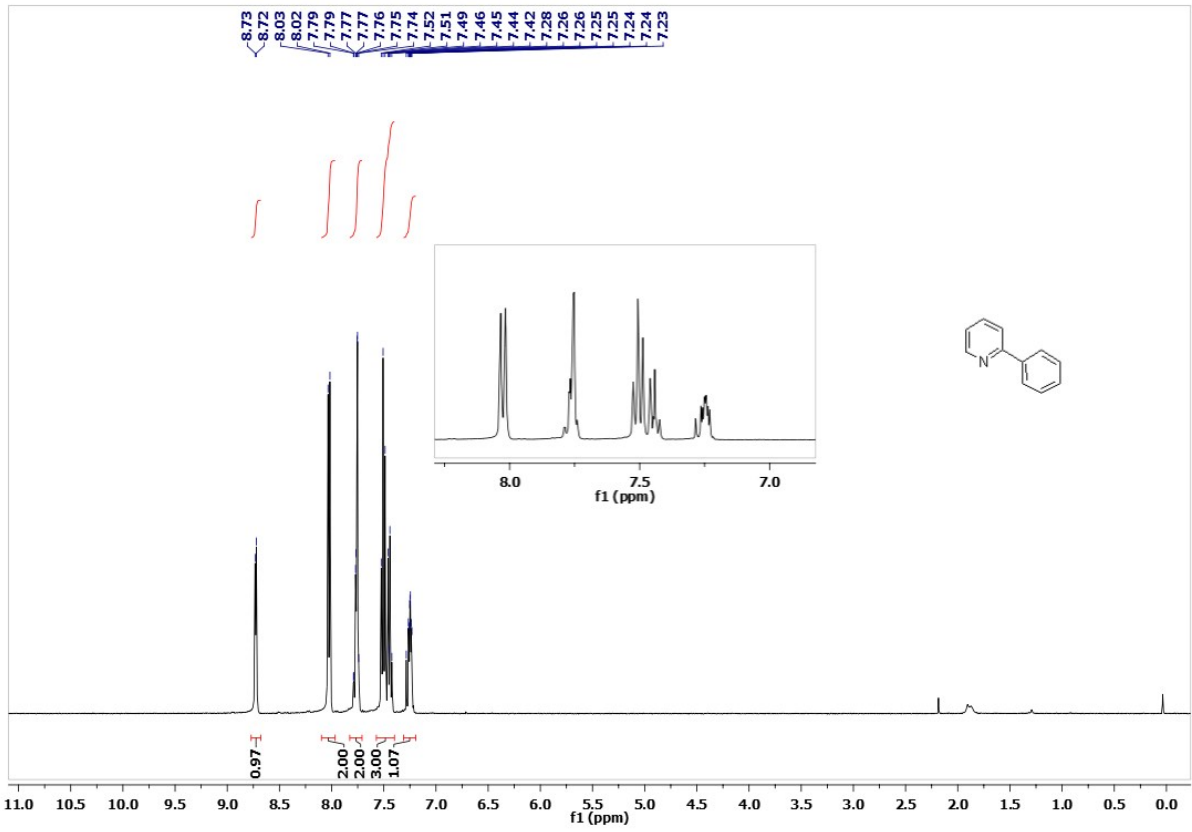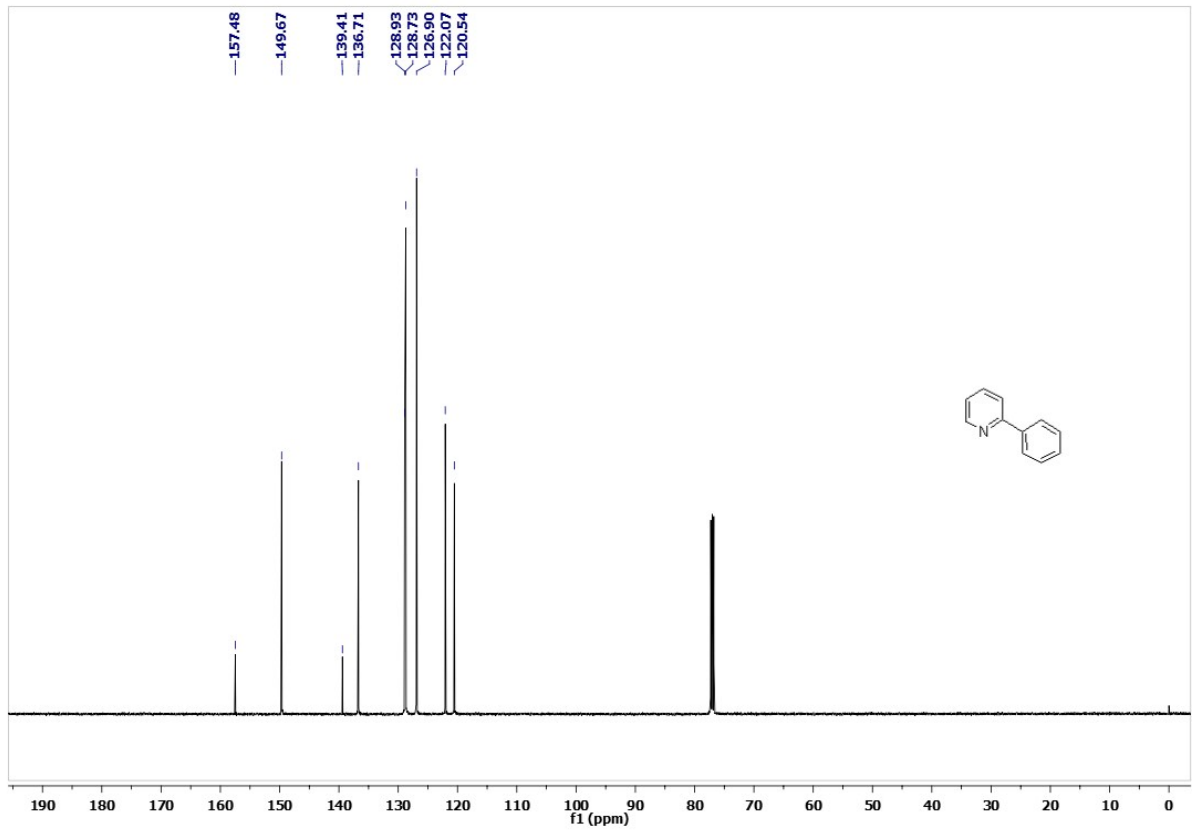

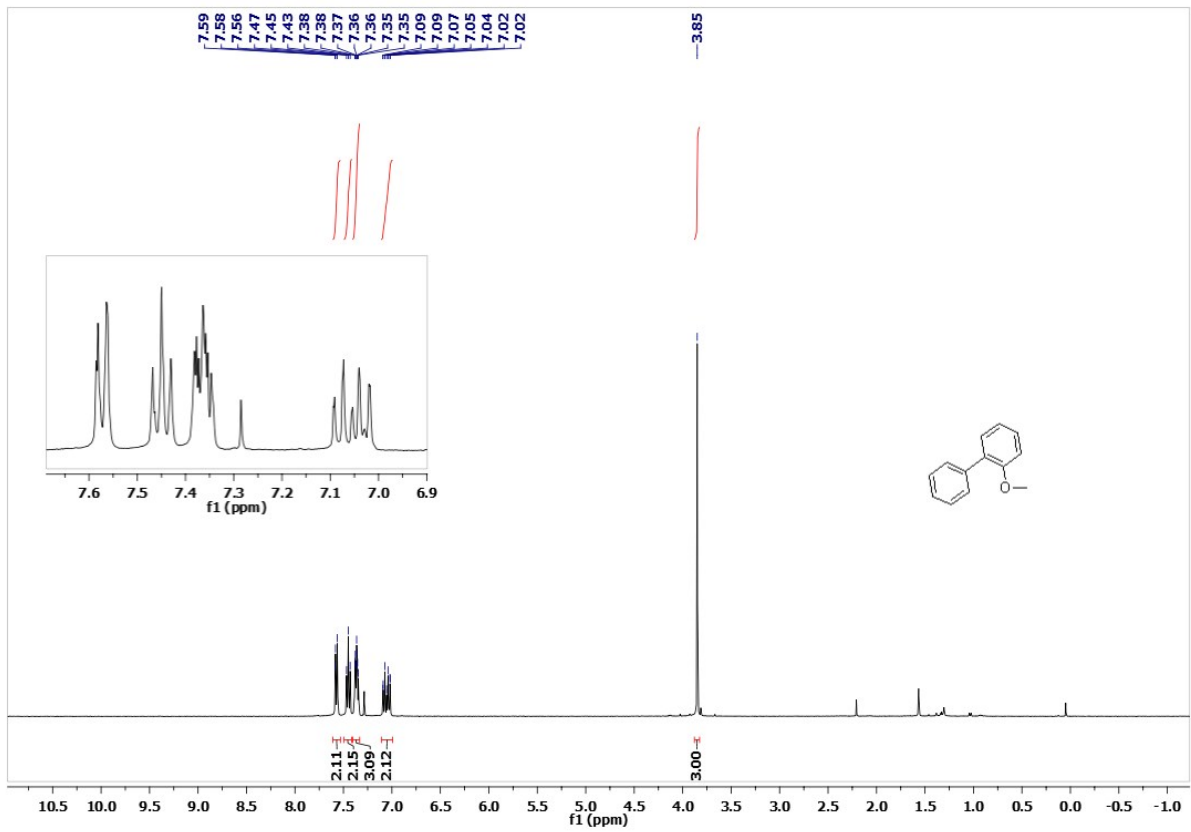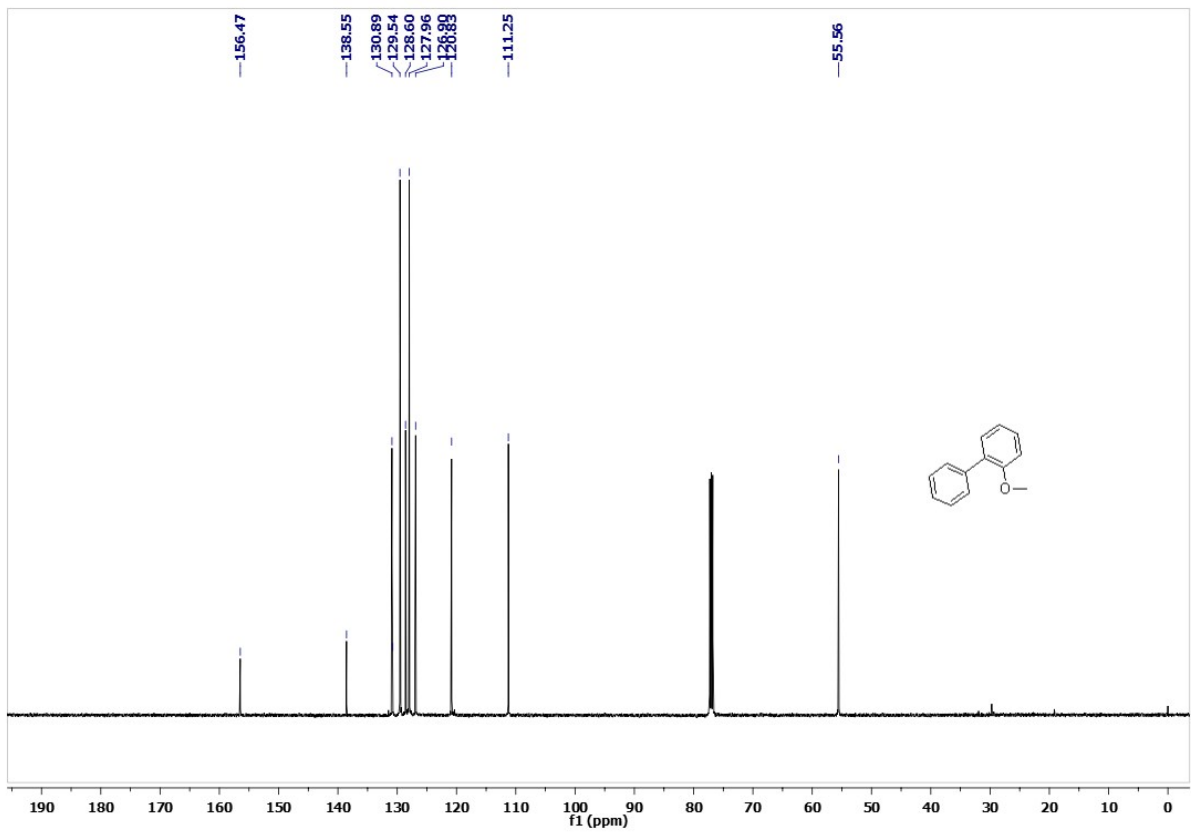



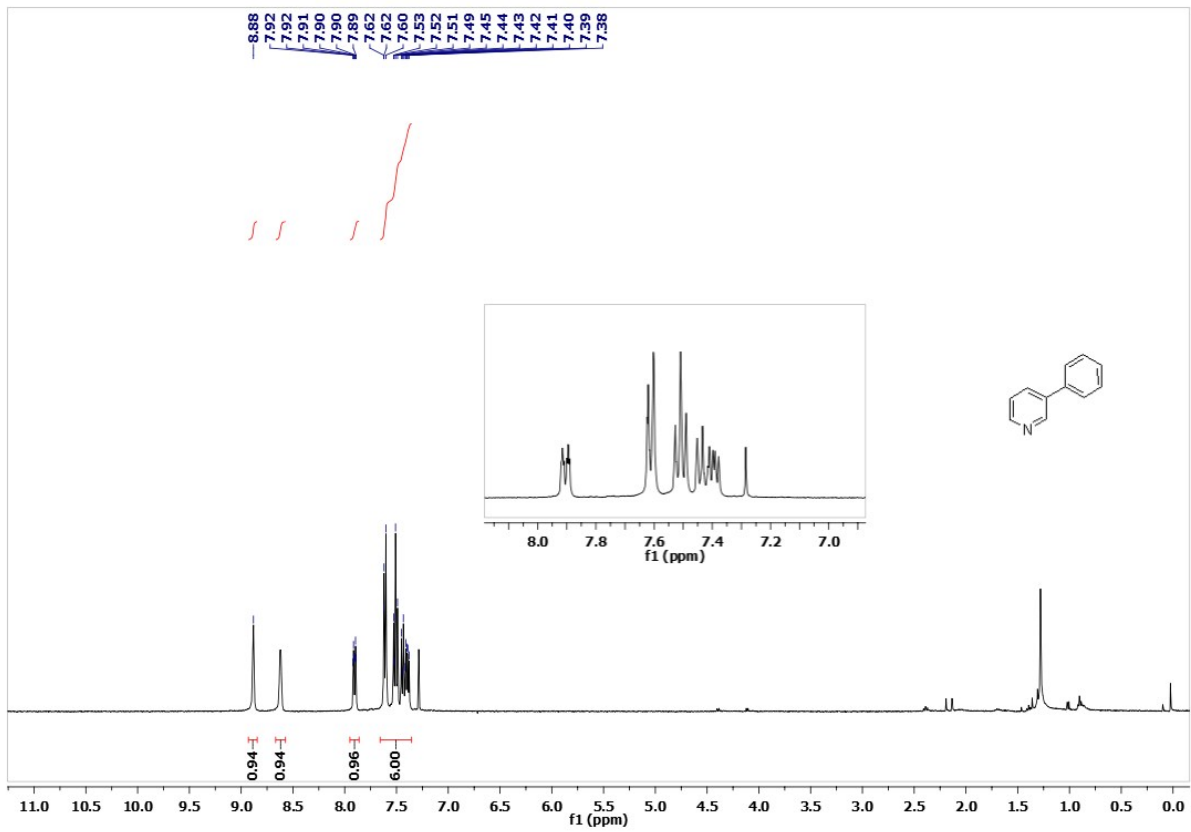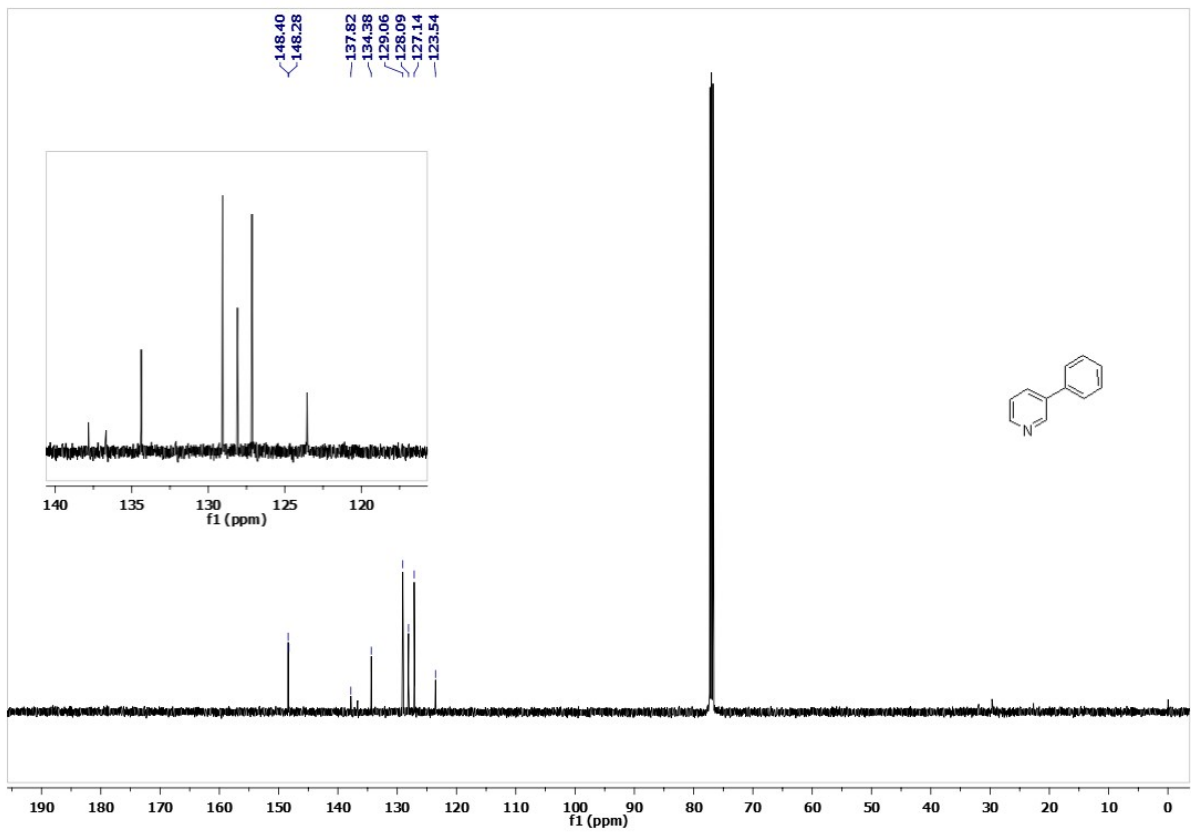

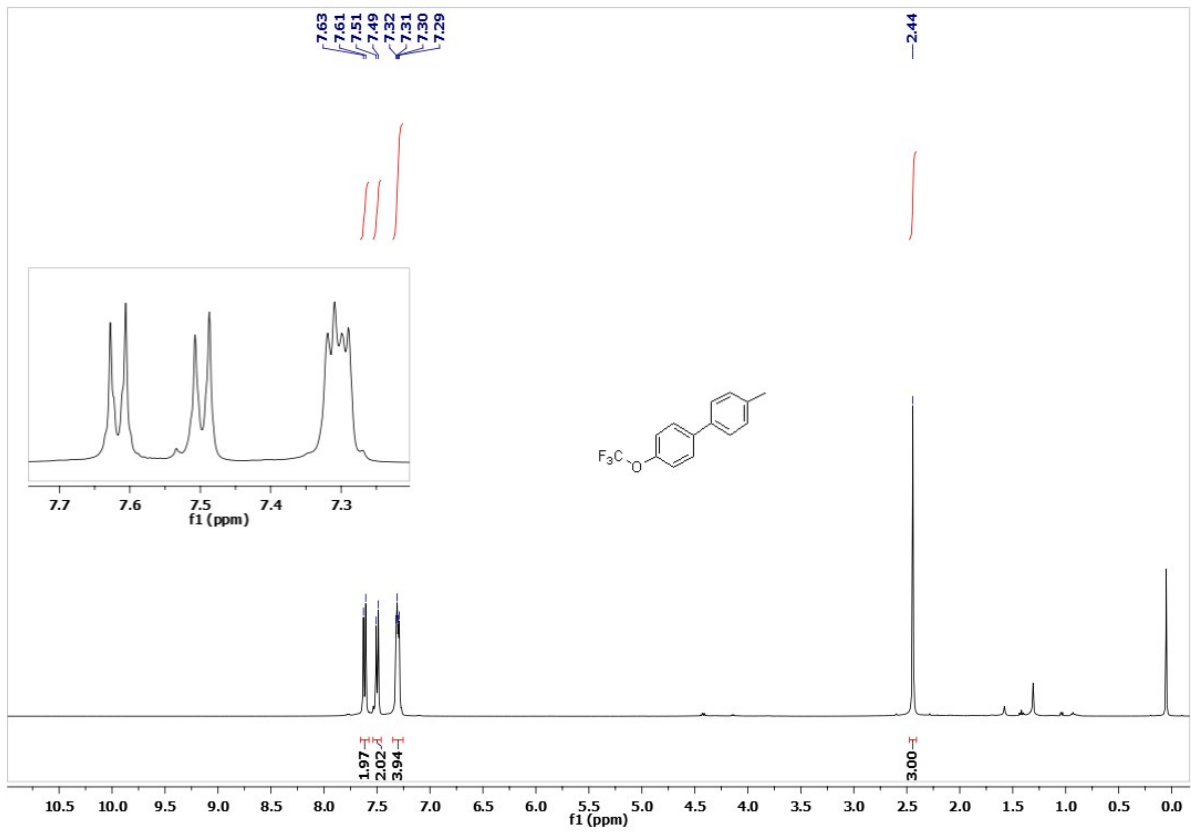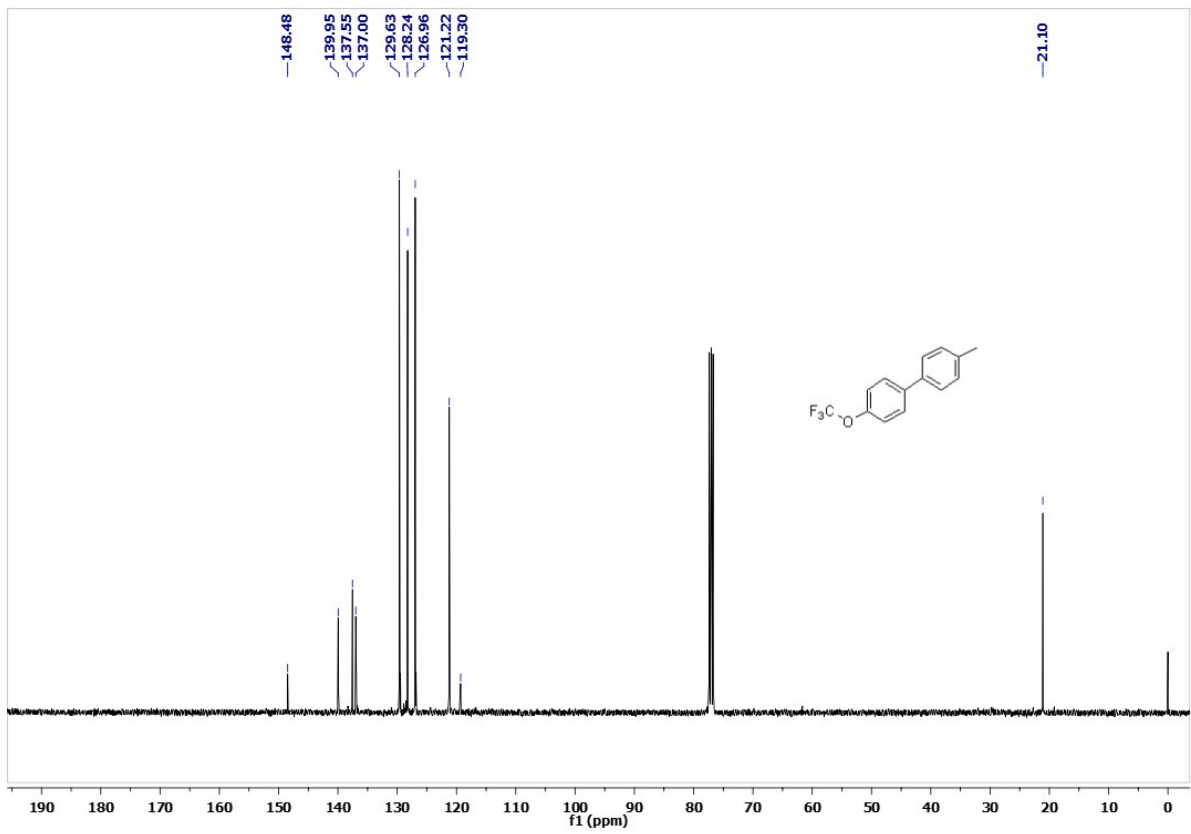

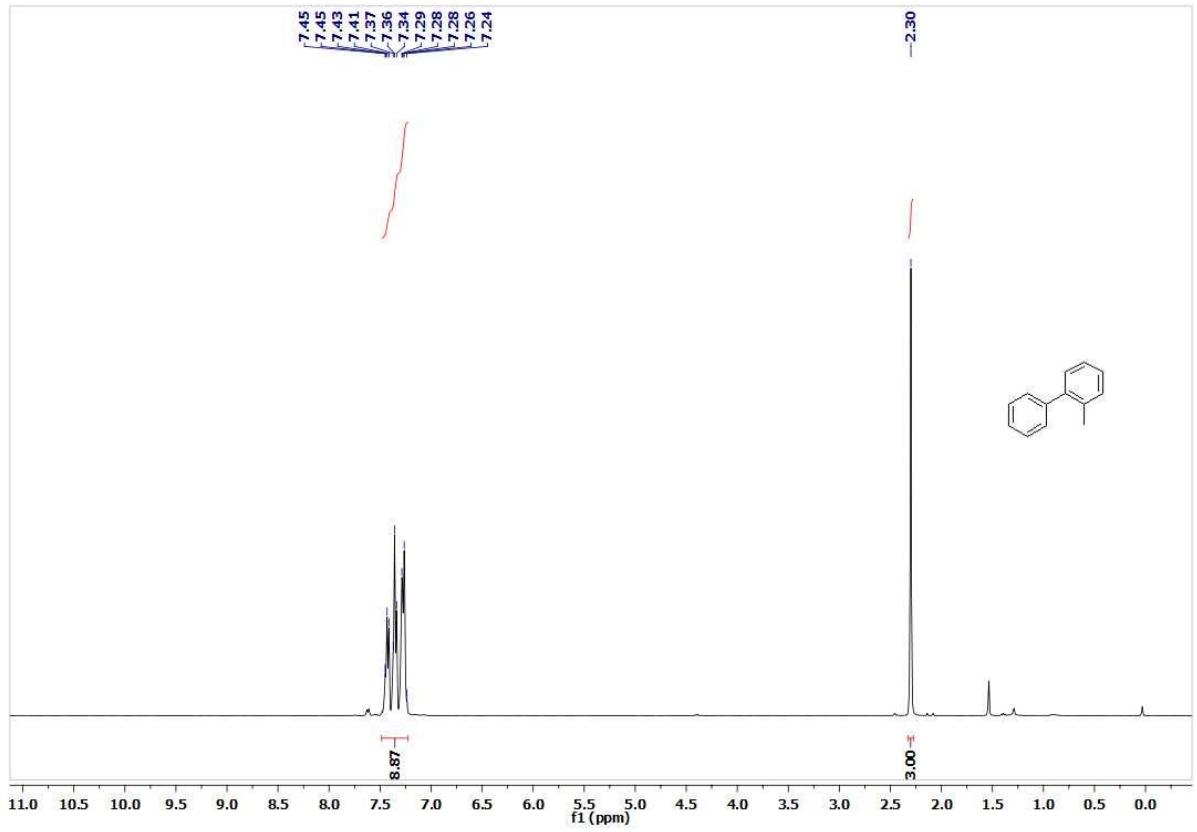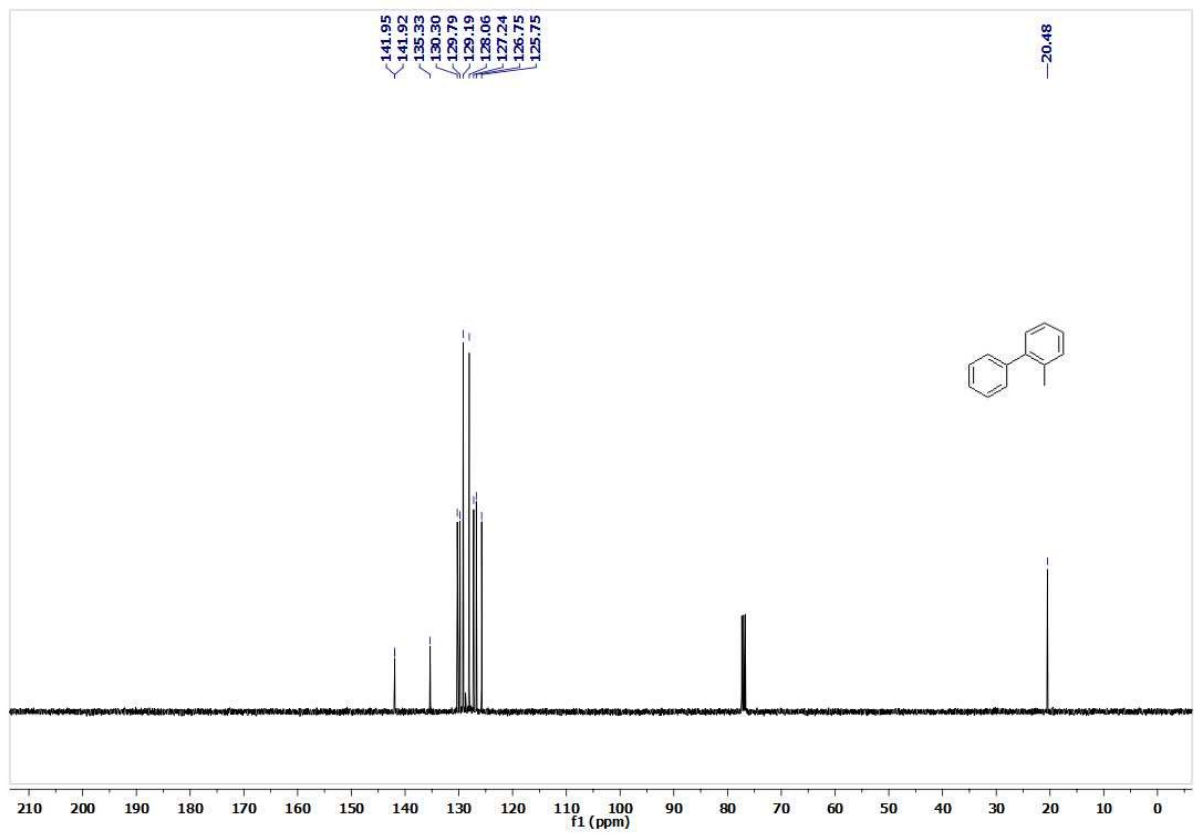

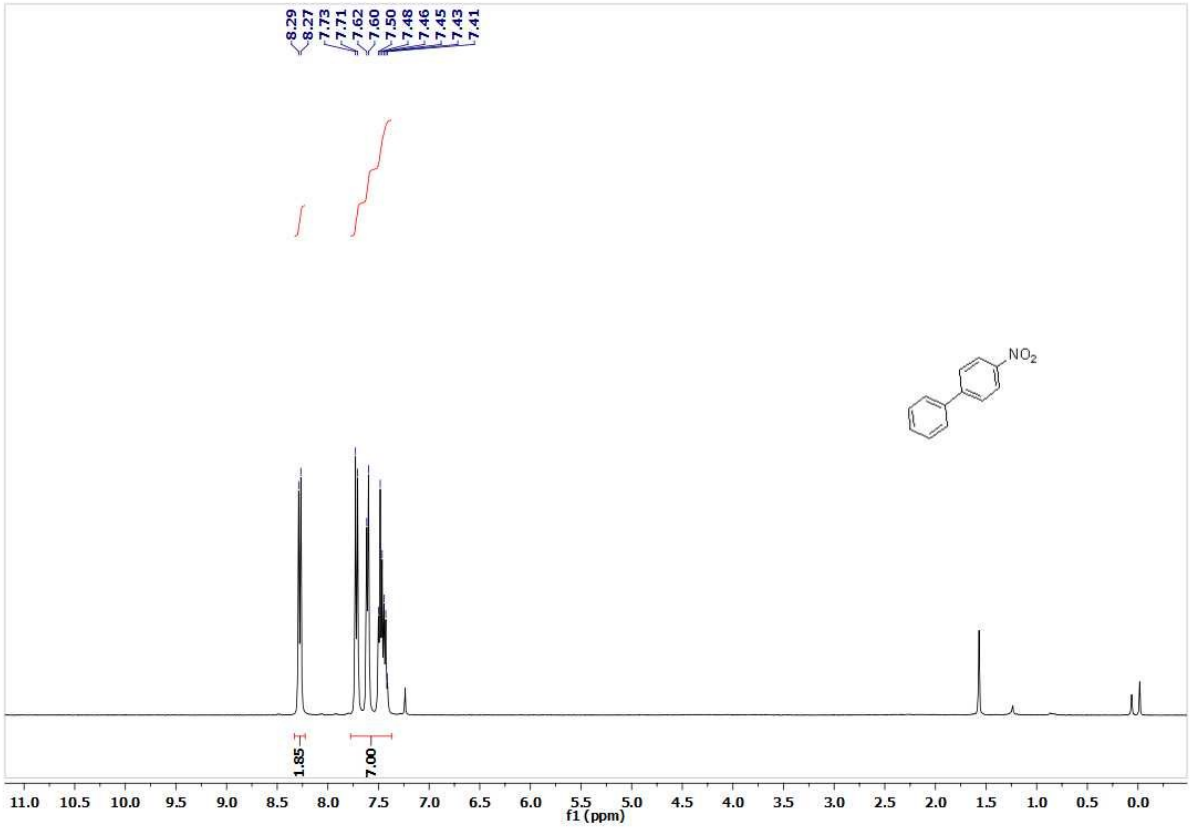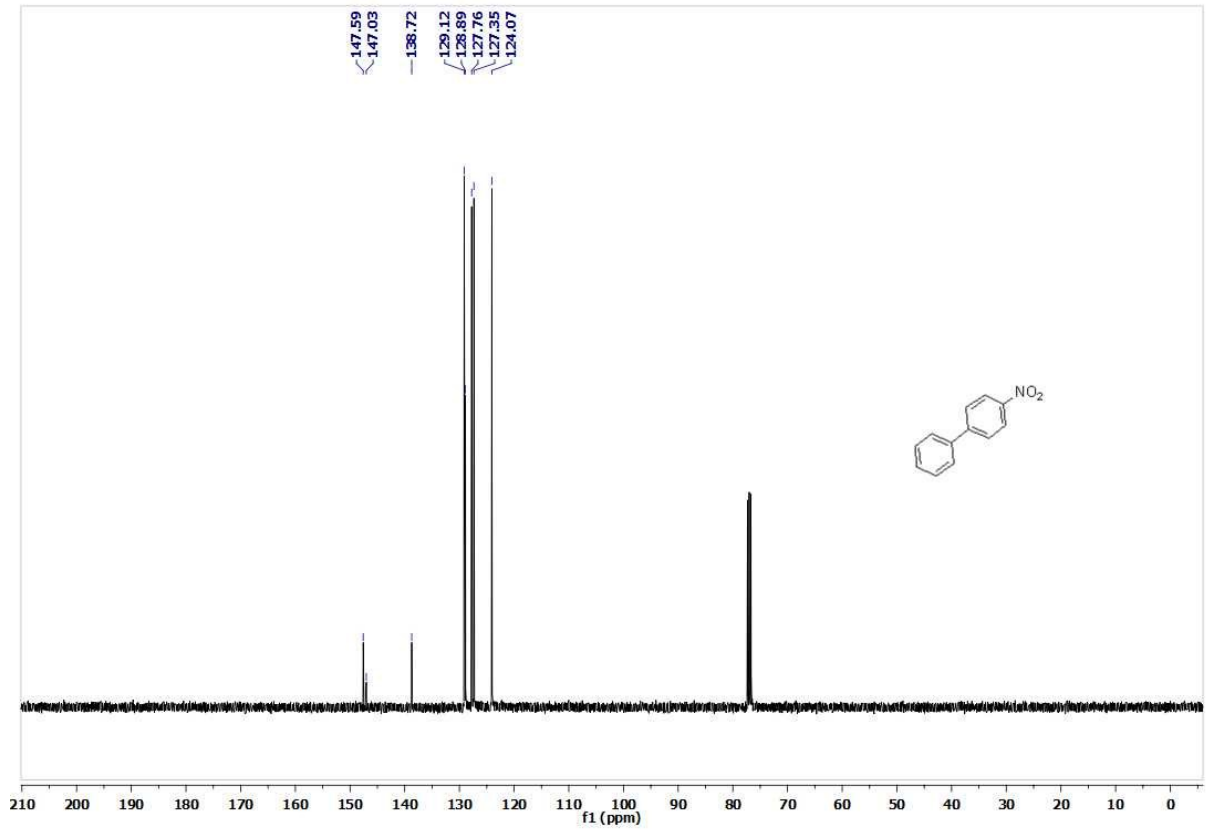

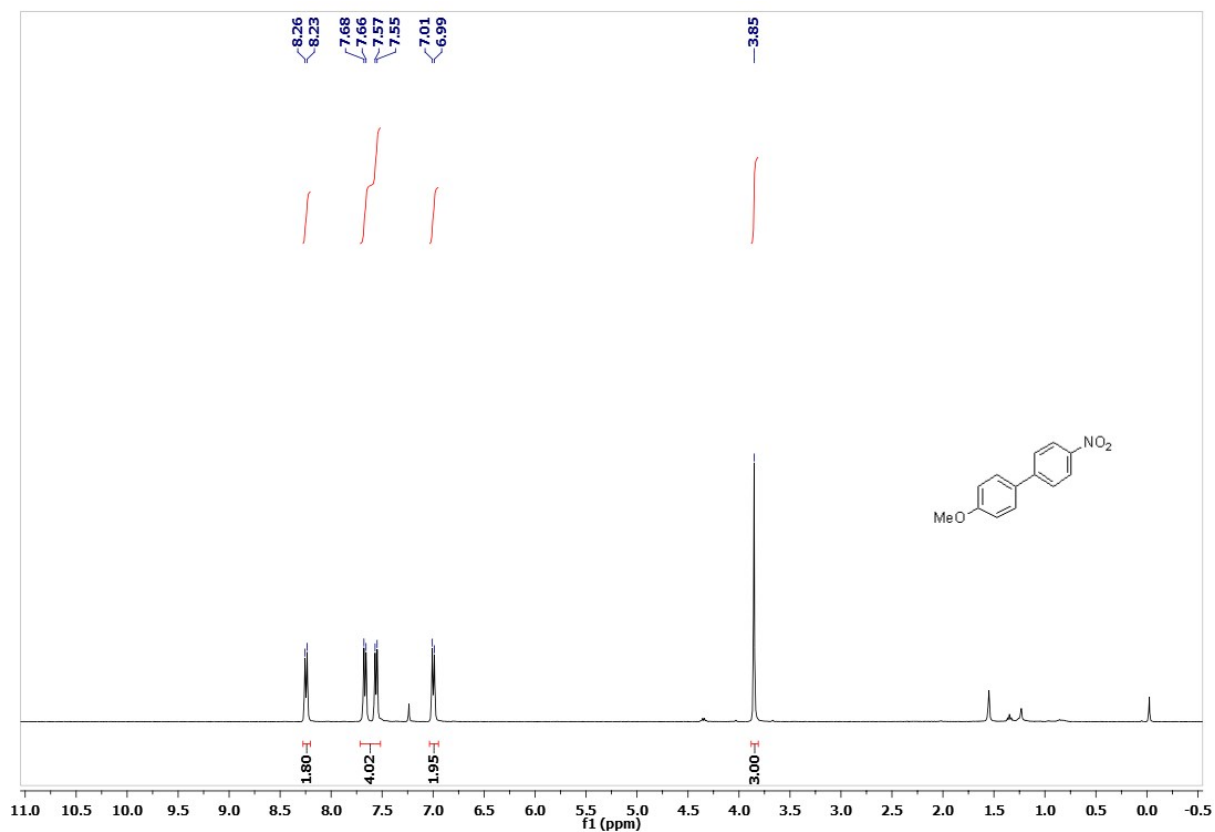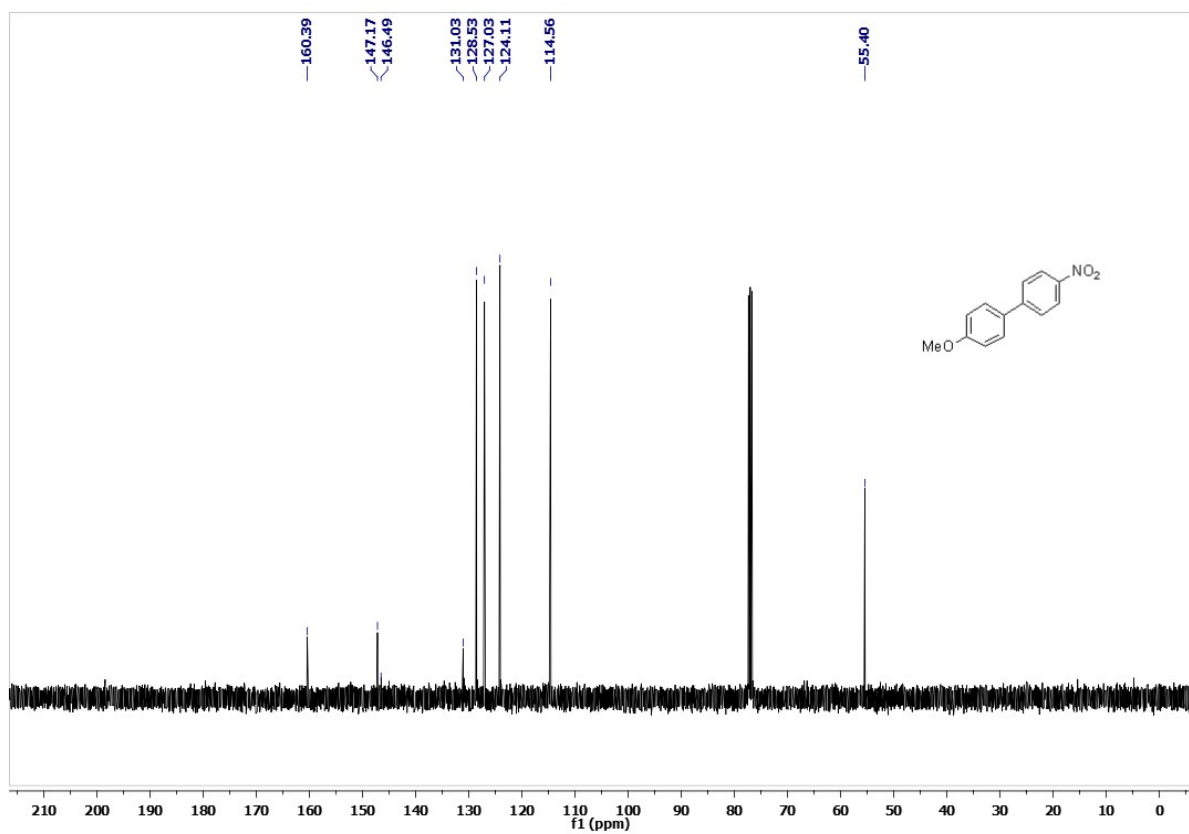

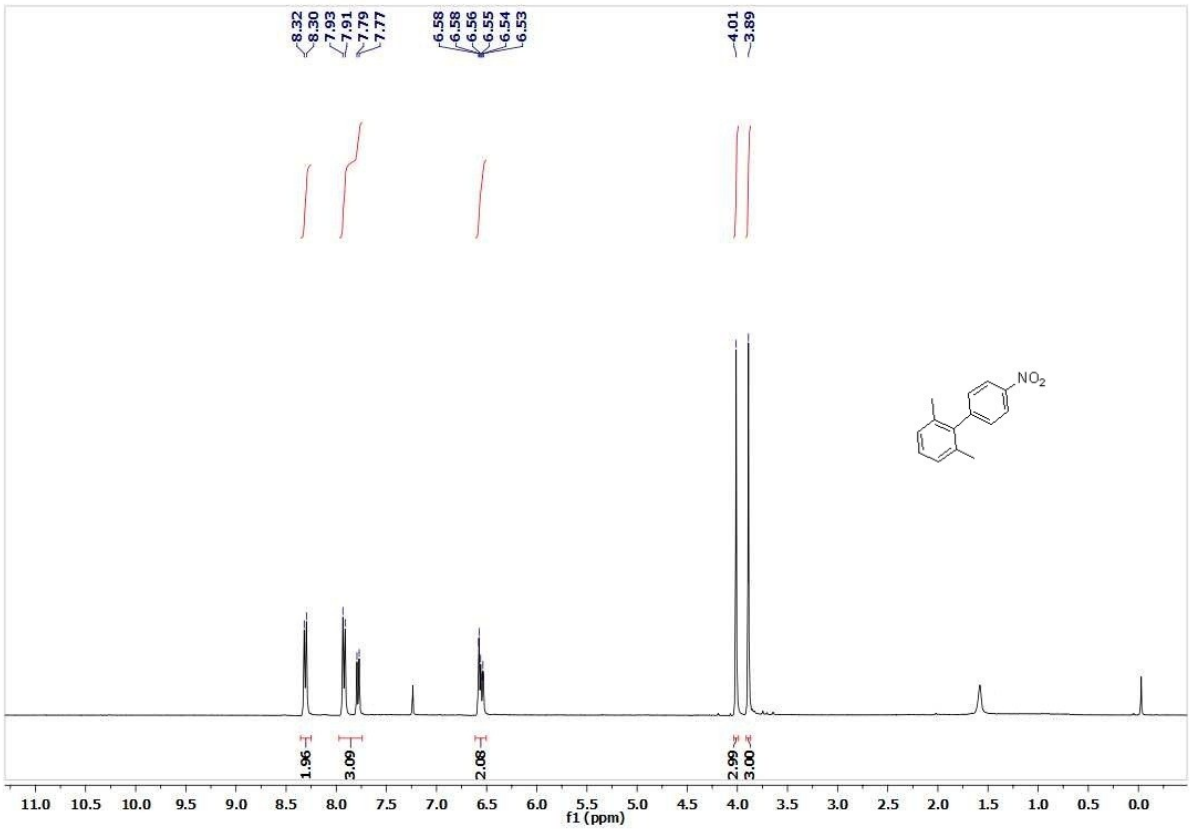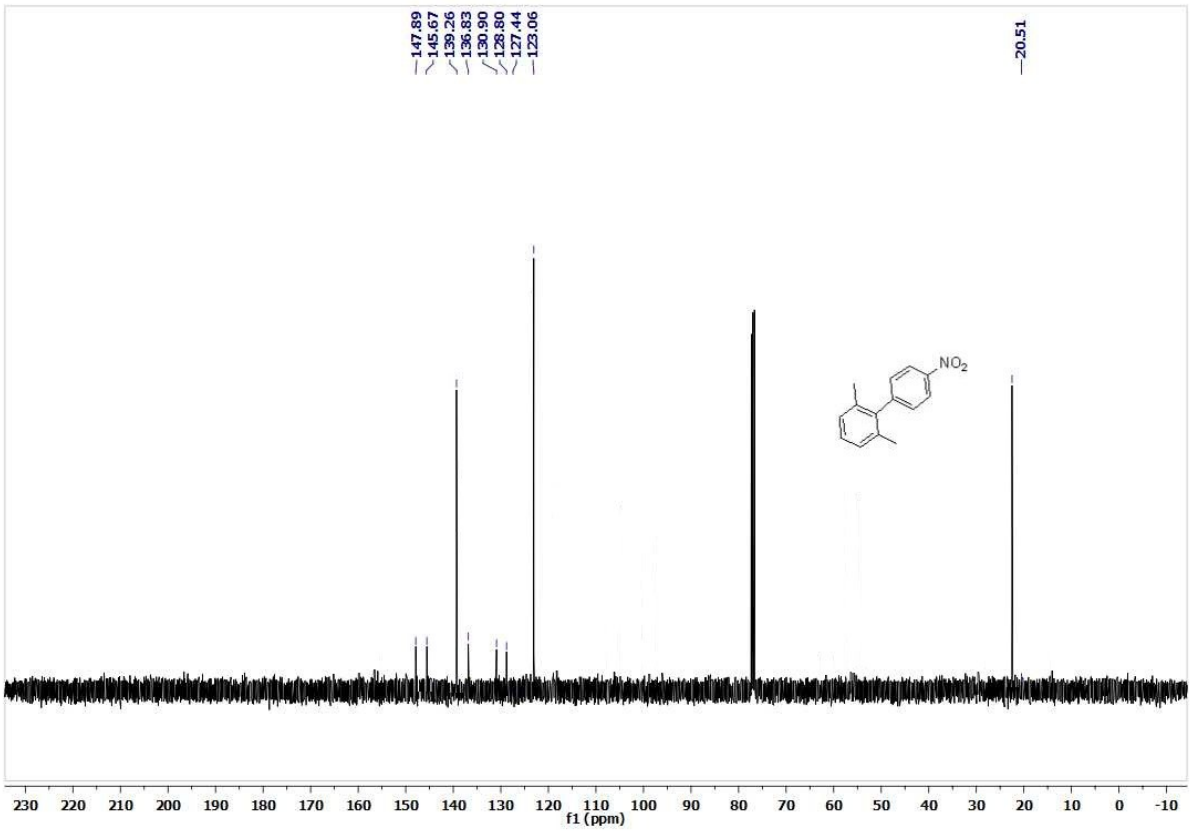

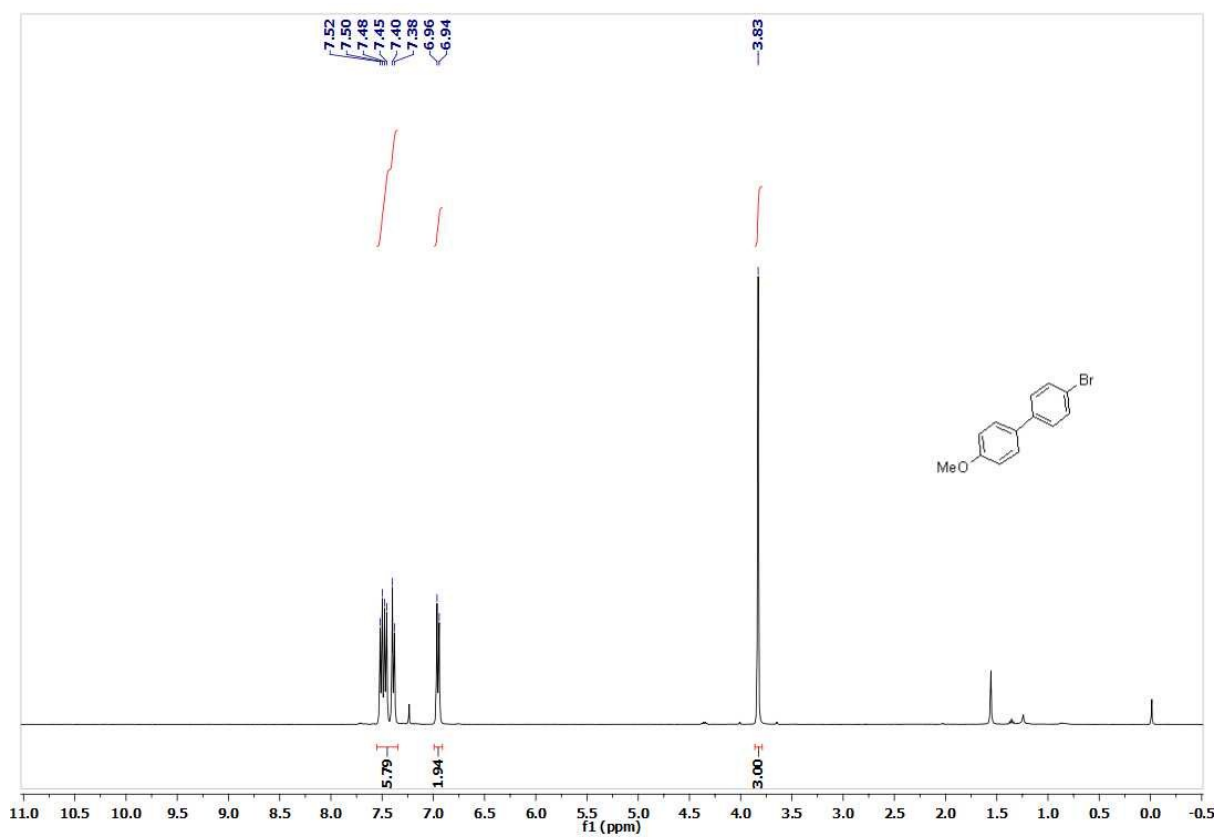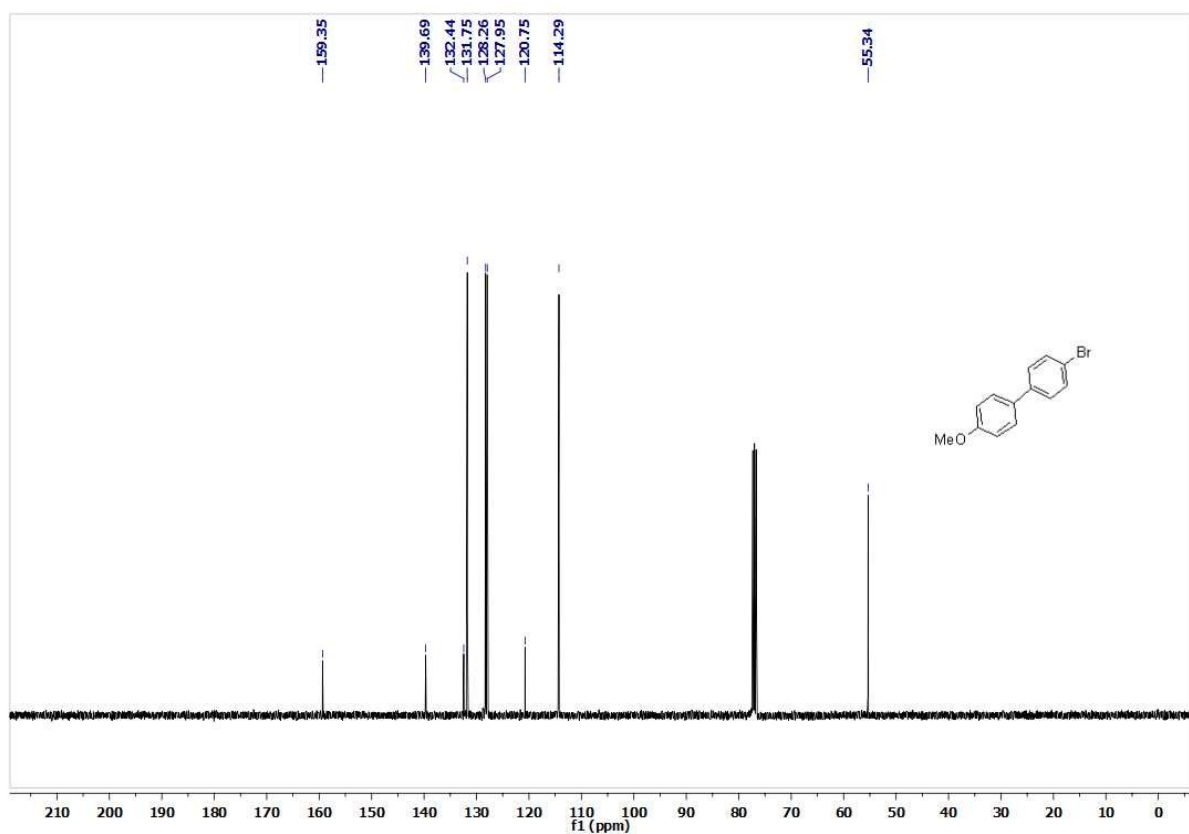

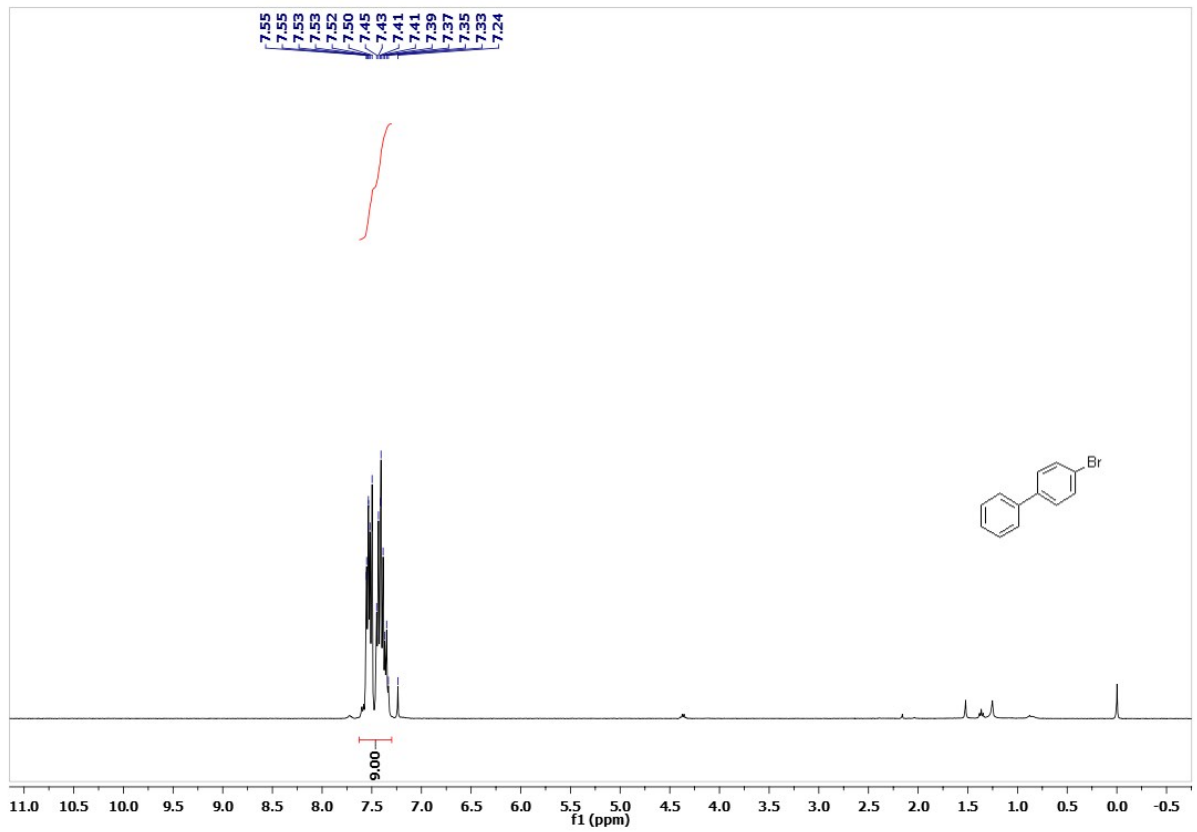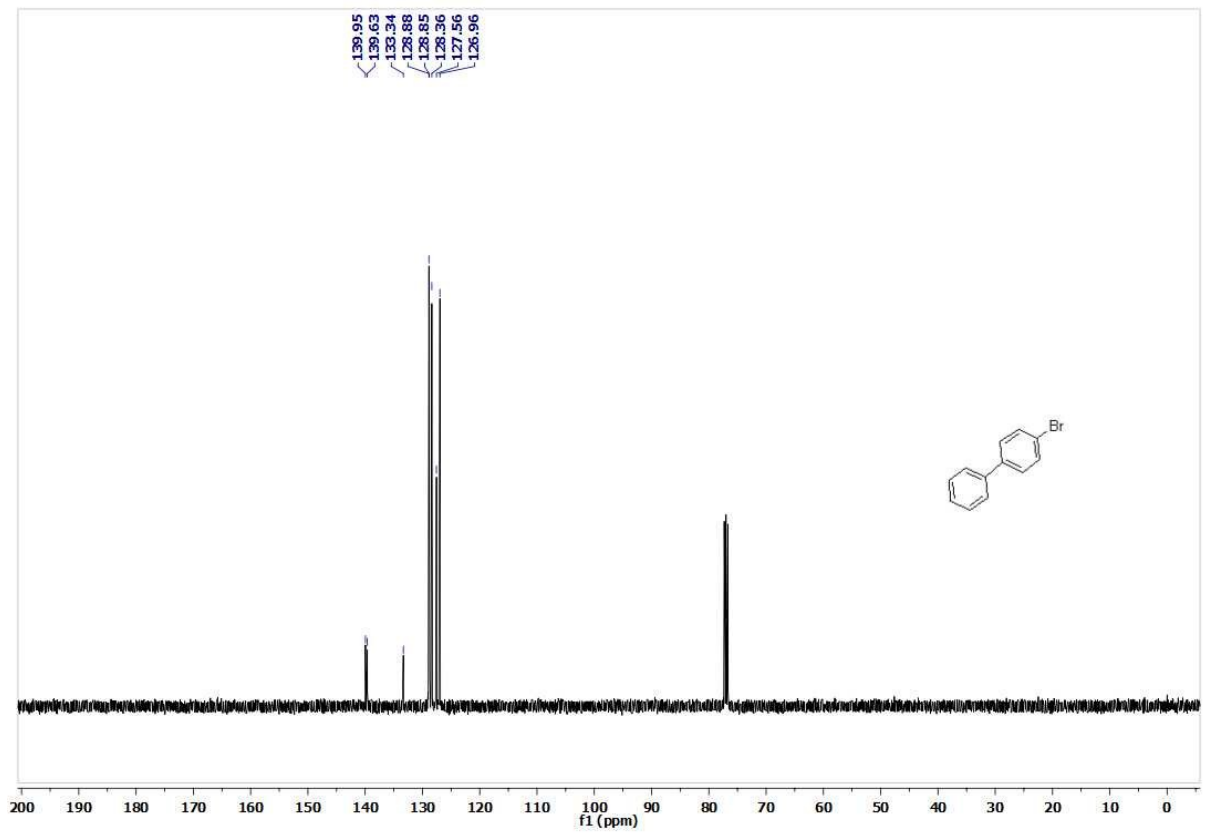



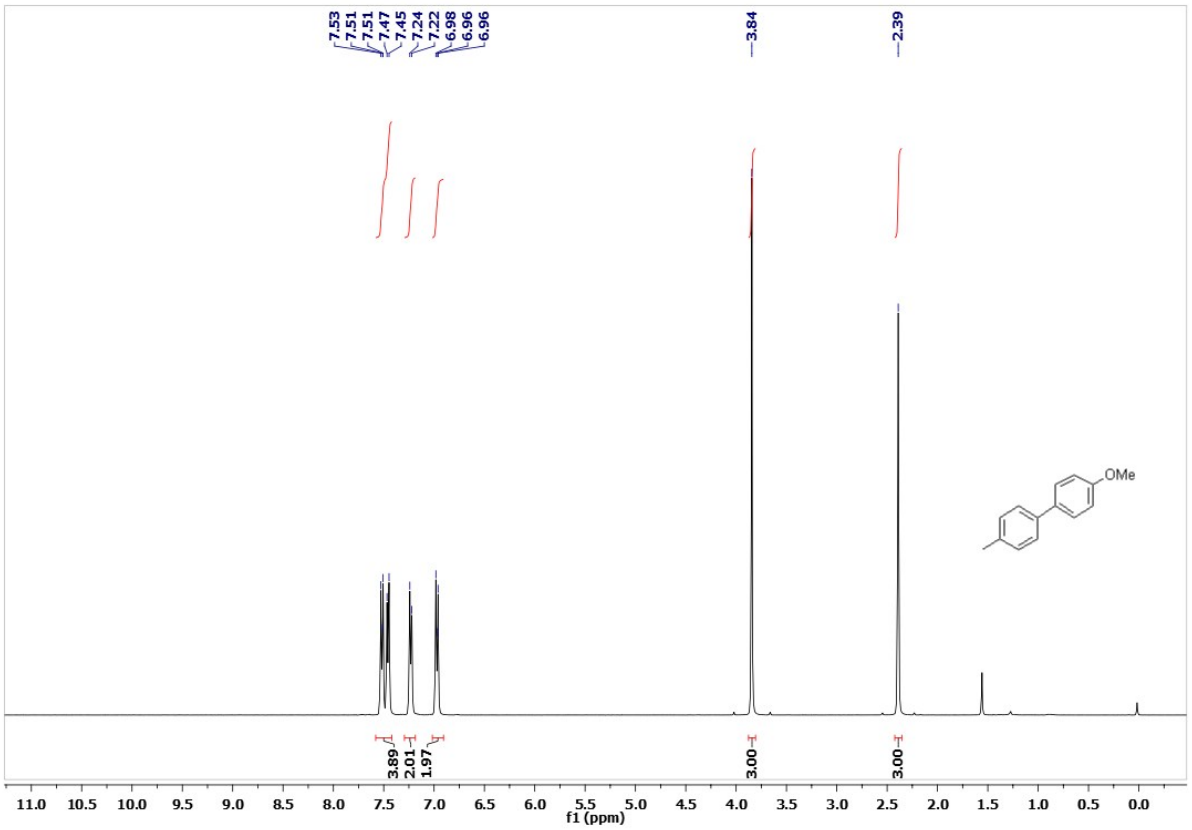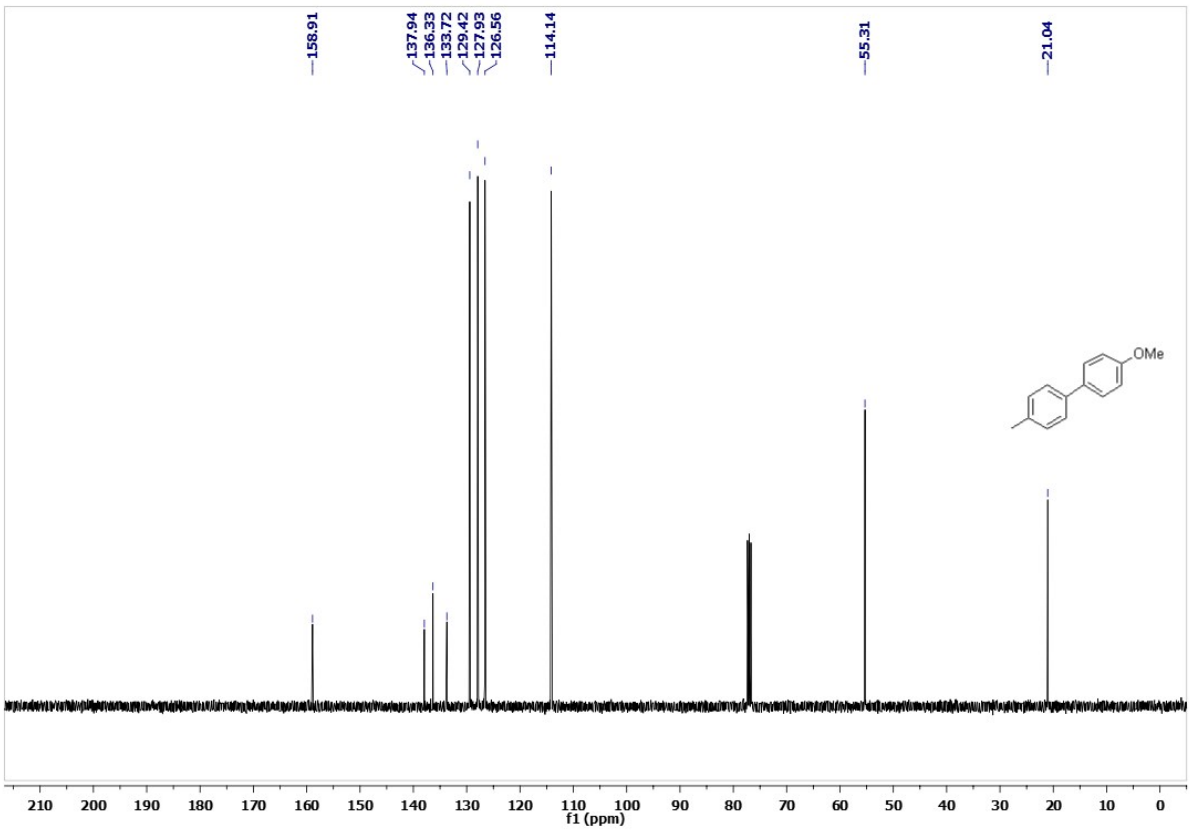

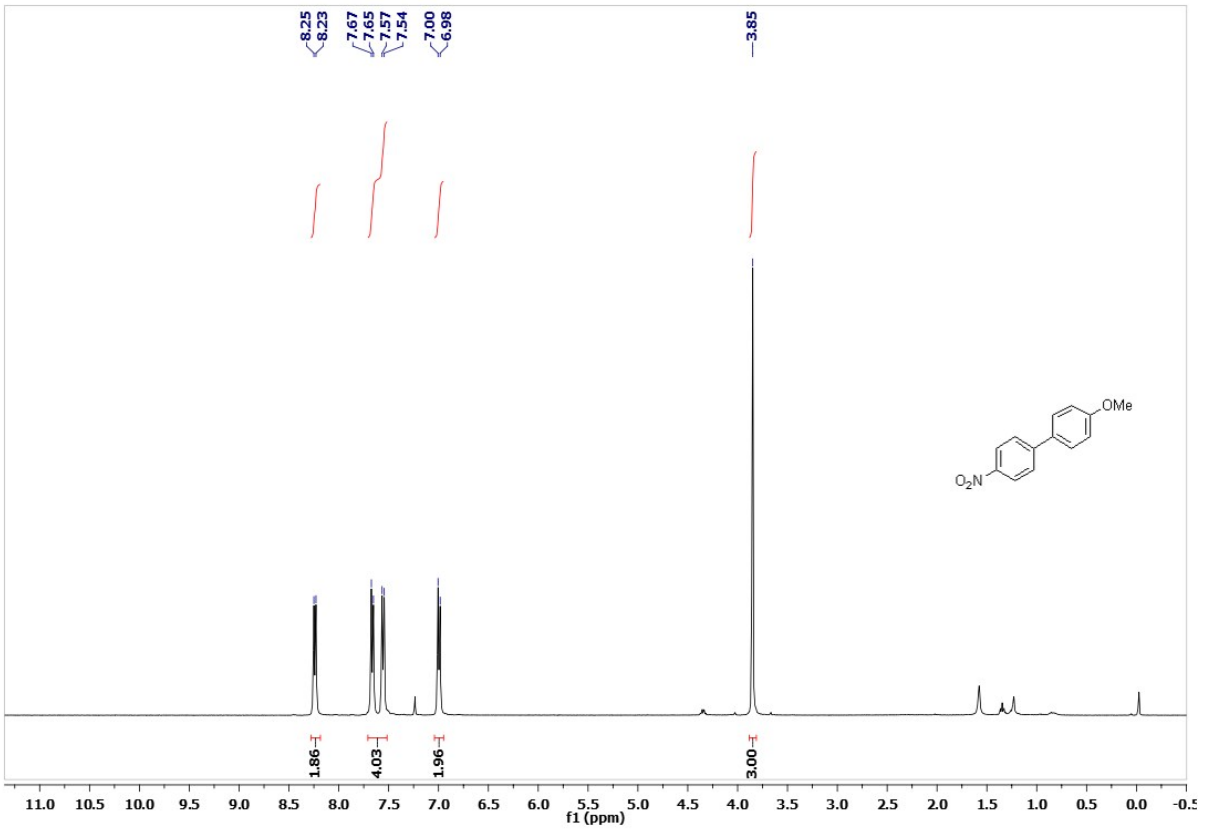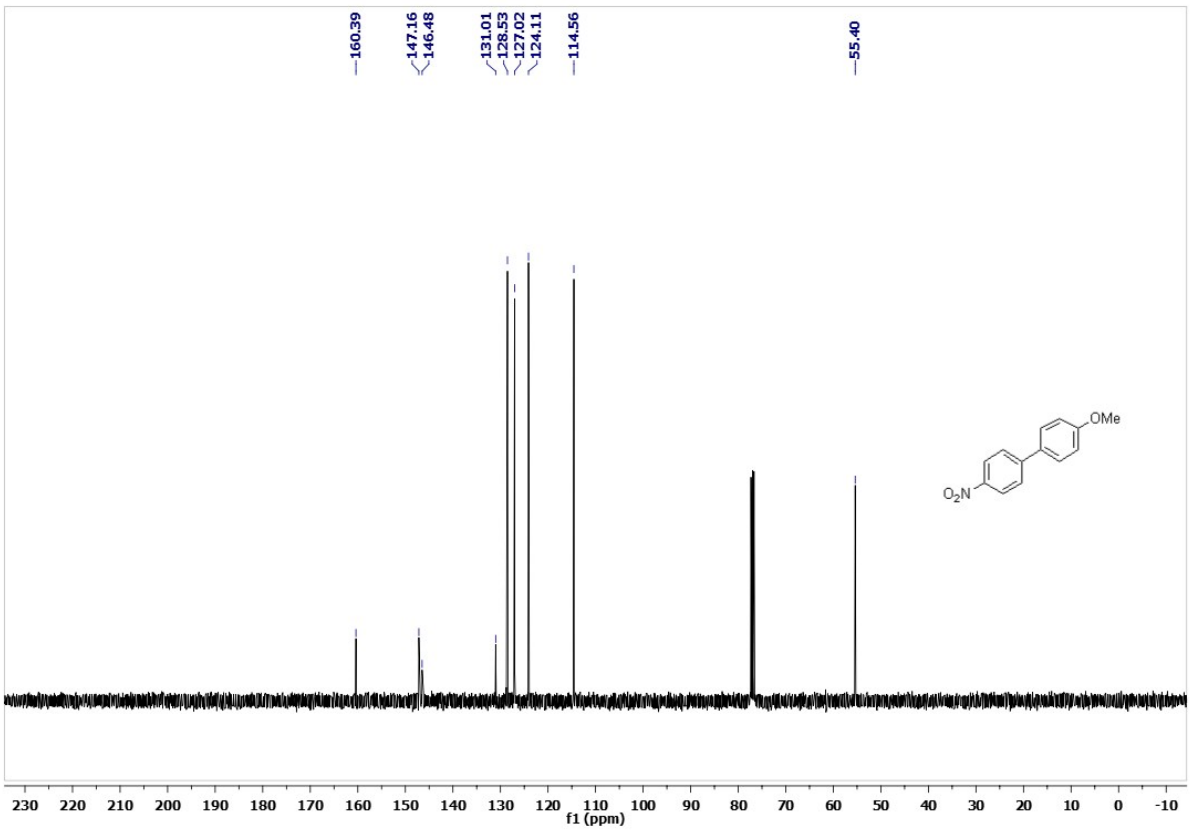

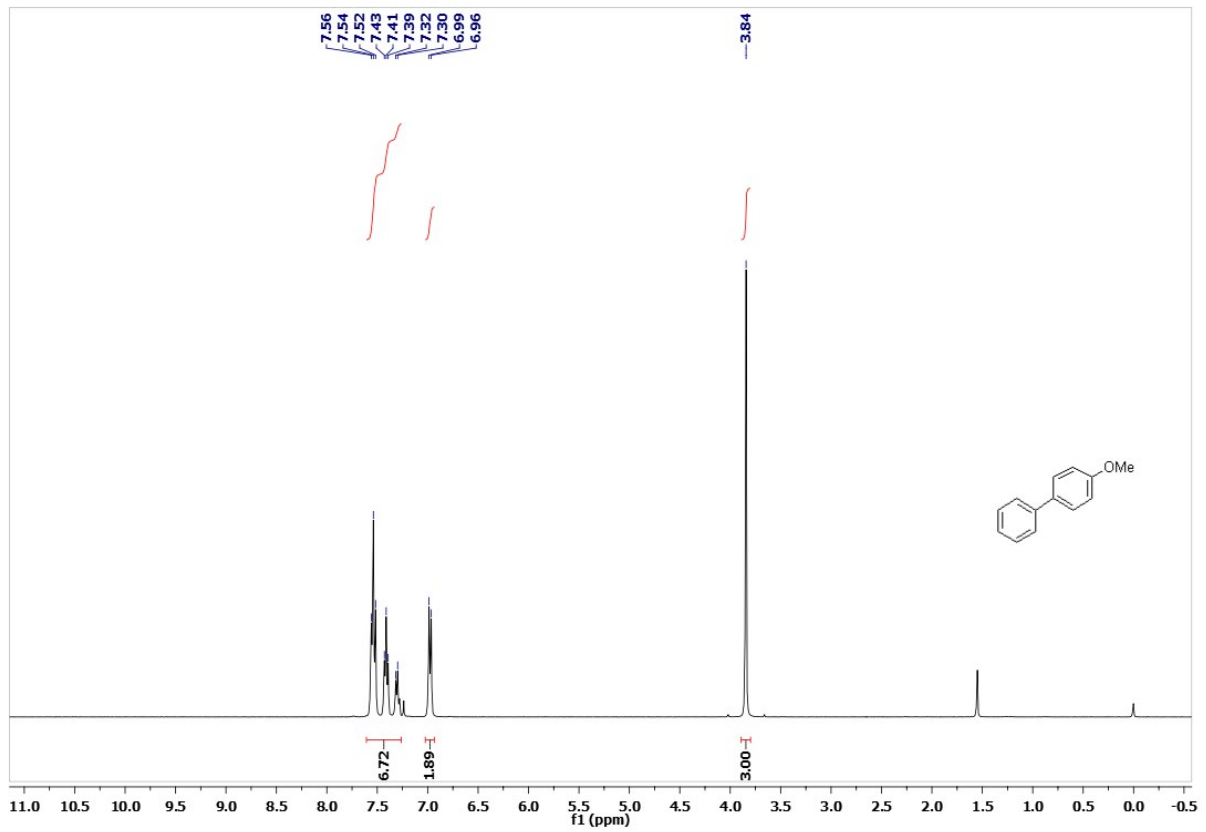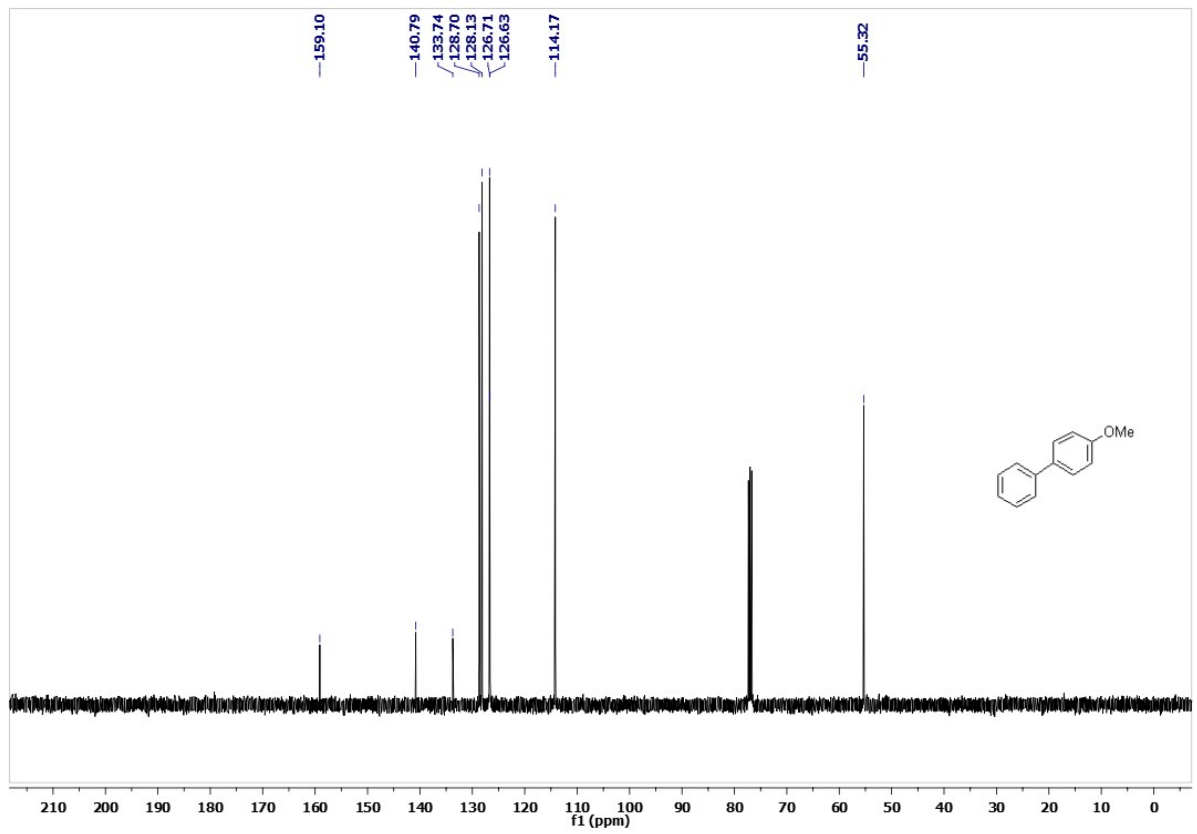

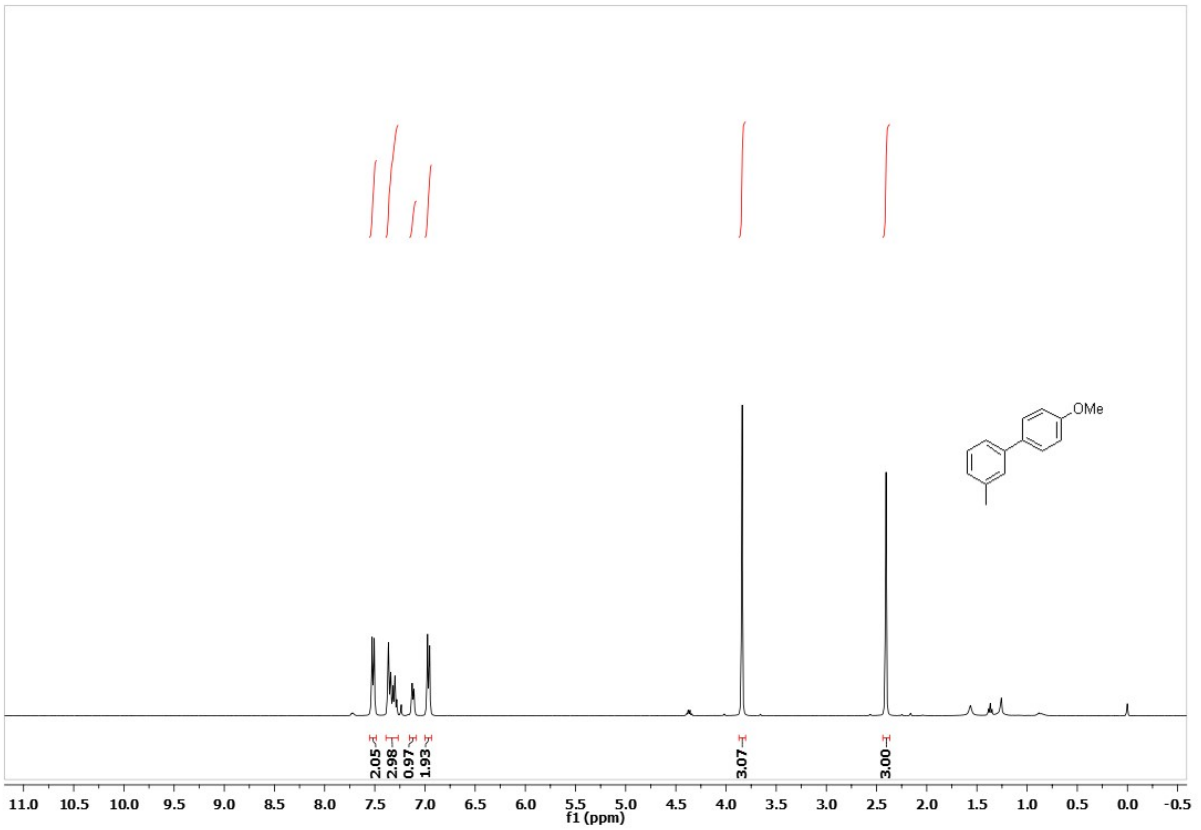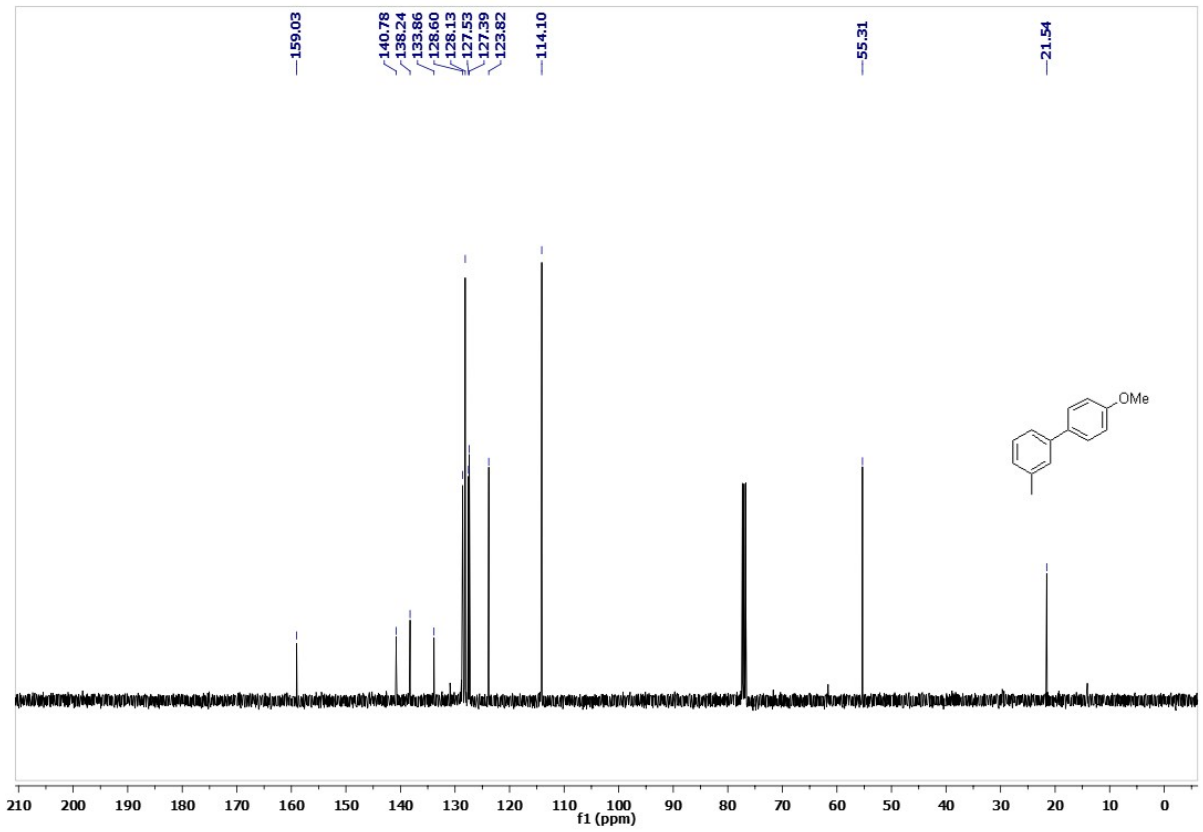

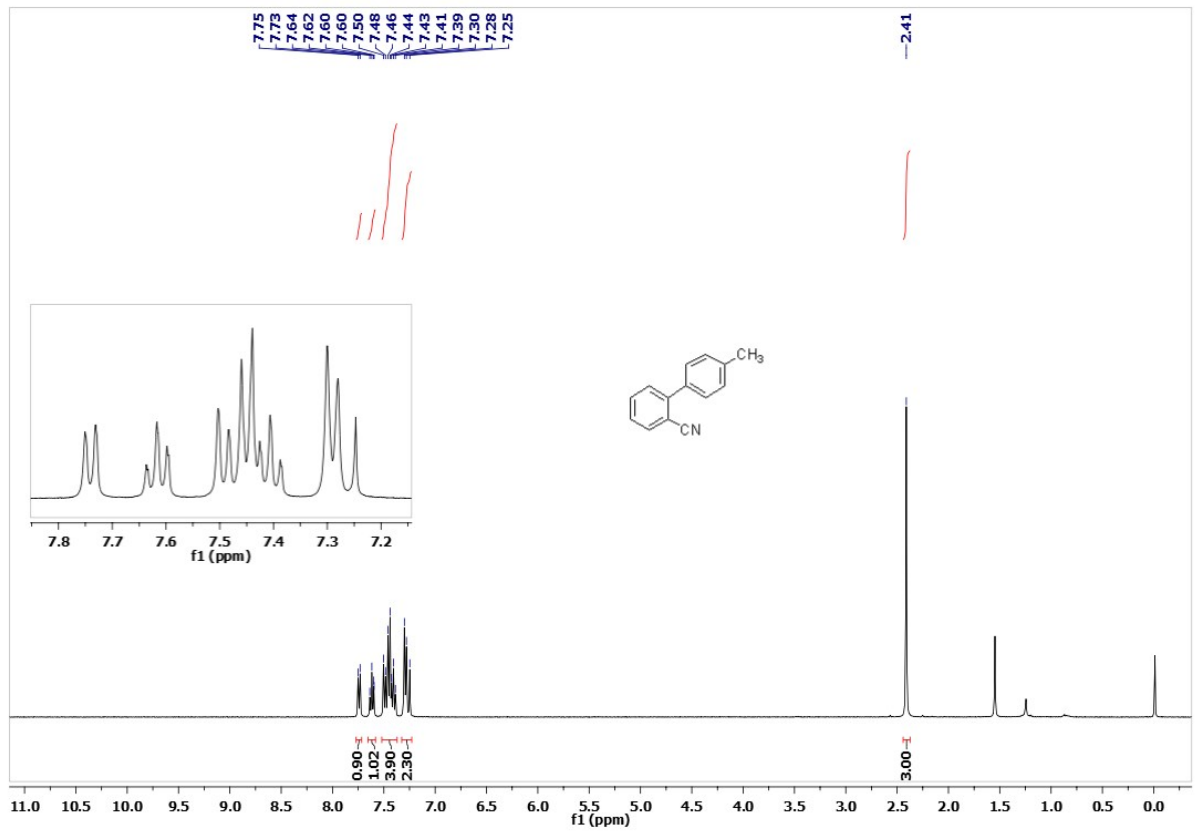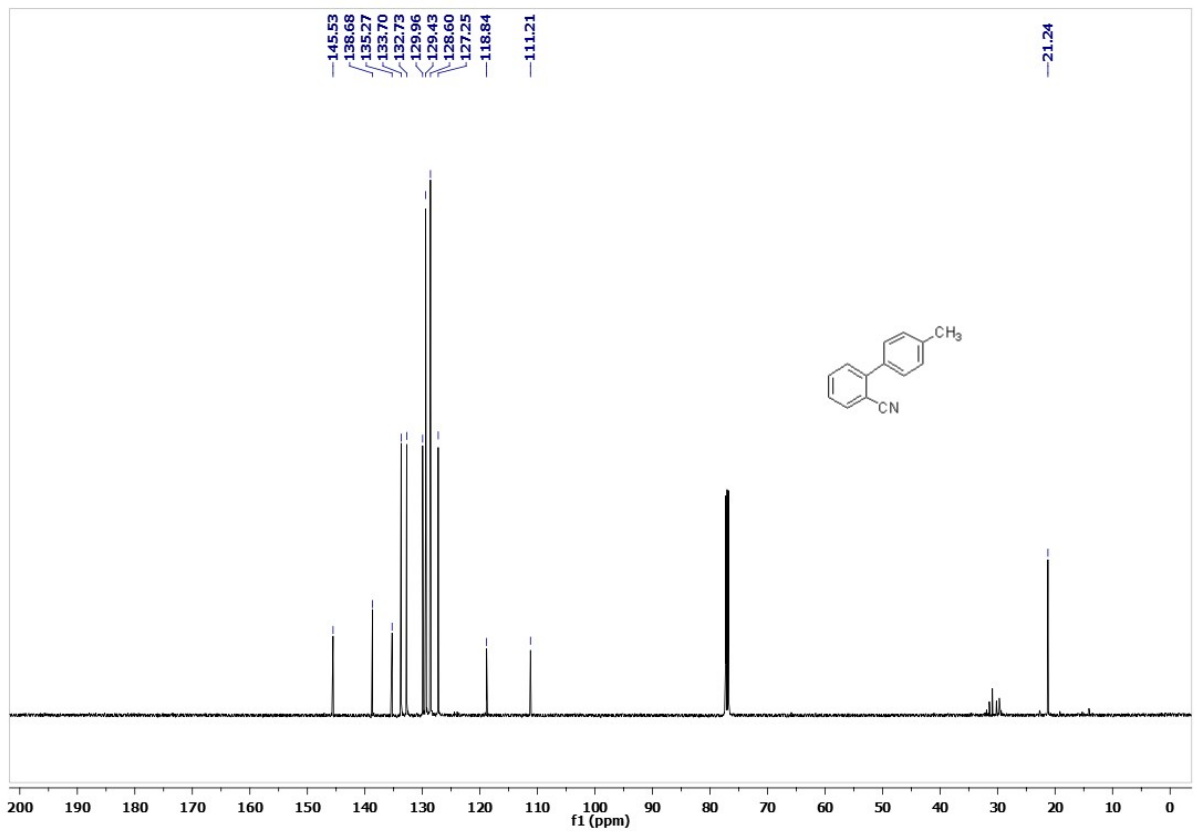

## Reference:

1. R. Mrówczyński, R. Turcu, C. Leostean, H. A. Scheidt and J. Liebscher, *Materials Chemistry and Physics*, 2013, **138**, 295-302.
2. B. Pieber, D. Cantillo, and C. O. Kappe, *Chem. Eur. J.*, 2012, **18**, 5047-5055.
3. C. Zhou, J. Wang, L. Li, R. Wang and M. Hong, *Green Chem.*, 2011, **13**, 2100-2106.
4. X.Q. Zhang and Z.X. Wang, *Synlett*, 2013, **24**, 2081-2084.
5. C. Puttaa and S. Ghosh, *Adv. Synth. Catal.*, 2011, **353**, 1889-1896.
6. N. Yokoyama, Y. Nakayama, H. Nara and N. Sayoa, *Adv. Synth. Catal.*, 2013, **355**, 2083-2088.
7. H. Zhao, J. Shen, J. Guo, R. Ye and H. Zeng, *Chem. Commun.*, 2013, **49**, 2323-2325.
8. V. Gauchot, W. Kroutil and A. R. Schmitzer, *Chem. Eur. J.* 2010, **16**, 6748-6751.
9. O. Y. Yuen, S. M. Wong, K. F. Chan, C. M. So and F. Y. Kwong, *Synthesis* 2014, **46**, 2826-2832.
10. J. Tang, A. Biafora, and L. J. Goossen, *Angew. Chem. Int. Ed.* 2015, **54**, 13130-13133.
11. C. M. So, C. P. Lau and F.Y. Kwong, *Org. Lett.* 2007, **9**, 2795.
12. J.H. Li, Q.M. Zhu and Y.X. Xie, *Tetrahedron*, 2006, **62**, 10888-10895.
13. D. Oesch and N. W. Luedtke, *Chem. Commun.*, 2015, **51**, 12641-12644
14. A. K. Shil, N. R. Guha, D. Sharma and P. Das, *RSC Adv.*, 2013, **3**, 13671-13676.
15. Z.Y. Tang, S. Spinella and Q.S. Hu, *Tetrahedron Letters*, 2006, **47**, 2427-2430.
16. B. T. Guan, X. Y. Lu, Y. Zheng, D. G. Yu, T. Wu, K. L. Li, B. J. Li and Z. J. Shi, *Org. Lett.* 2010, **12**, 396.
